# Supplementary material
Source: HighWire-hosted journal article supplement (https://thorax.bmj.com/content/77/4/378)
Supplement: inline-supplementary-material-1 [file inline-supplementary-material-1.pdf]

## Supplementary materials

### International differences in lung cancer survival by sex, histological type and stage at diagnosis

Marzieh Araghi<sup>1\*</sup>, Miranda M Fidler-Benaoudia<sup>2\*</sup>, Melina Arnold<sup>1</sup>, Mark Rutherford<sup>1,3</sup>, Aude Bardot<sup>1</sup>, Jacques Ferlay<sup>1</sup>, Oliver Bucher<sup>4</sup>, Prithwish De<sup>5</sup>, Gerda Engholm<sup>6</sup>, Anna Gavin<sup>7</sup>, Serena Kozie<sup>8</sup>, Alana Little<sup>9</sup>, Bjørn Møller<sup>10</sup>, Nathalie Saint-Jacques<sup>11</sup>, Hanna Tervonen<sup>9</sup>, Paul Walsh<sup>12</sup>, Ryan Woods<sup>13,14</sup>, (C/ARC), Freddie Bray<sup>1</sup>, Isabelle Soerjomataram<sup>1</sup>

\*Authors have contributed equally to the paper

<sup>1</sup> Section of Cancer Surveillance, International Agency for Research on Cancer, 150 Cours Albert Thomas, Lyon, 69372 CEDEX 08, France

<sup>2</sup> Cancer Epidemiology and Prevention Research, Holy Cross Centre, Calgary AB T2S 3C3, Canada

<sup>3</sup> Department of Health Sciences, University of Leicester, University Road, Leicester, LE1 7RH, U.K.

<sup>4</sup> Department of Epidemiology and Cancer Registry, Cancercare Manitoba, MB, Canada

<sup>5</sup> Analytics and Informatics, Cancer Care Ontario, Toronto, Canada.

<sup>6</sup> Surveillance and Pharmacoepidemiology, Danish Cancer Society Research Center, Copenhagen, Denmark

<sup>7</sup> Northern Ireland Cancer Registry, Queen's University Belfast, Belfast, Northern Ireland

<sup>8</sup> Saskatchewan Cancer Agency 200-4545 Parliament Avenue Regina, SK S4W 0G3

<sup>9</sup> Cancer Institute New South Wales (NSW), PO Box 41, Alexandria NSW 1435, Australia

<sup>10</sup> Department of Registration, Cancer Registry of Norway, Oslo, Norway

<sup>11</sup> Nova Scotia Health Authority Cancer Care Program, Registry & Analytics, 1276 South Street, Halifax, B3H 2Y9, NS, Canada

<sup>12</sup> National Cancer Registry Ireland, Cork Airport Business Park, Kinsale Road, Cork T12 CDF7, Ireland.

<sup>13</sup> BC Cancer, Vancouver, British Columbia, Canada

<sup>14</sup> Faculty of Health Sciences, Simon Fraser University, Burnaby, BC V5A 1S6, Cancer Control Research, BC Cancer, Vancouver, BC V5Z 1L3

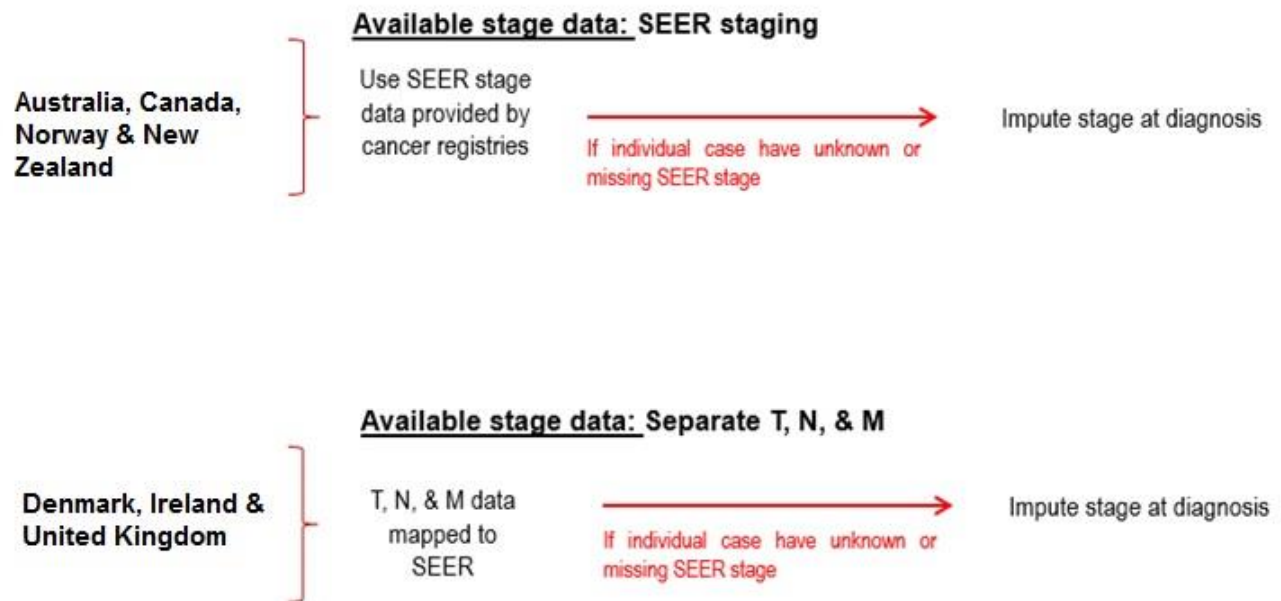

Supplementary Figure 1A. Diagram of processing stage data by country

| Stage Grouping | Single TNM               | SEER             |
|----------------|--------------------------|------------------|
| IV             | M1<br>N3                 | <b>Distant</b>   |
| III, II        | N2, N1<br>T4, T3         | <b>Regional</b>  |
| I              | T2 (2b, 2a), T1 (1b, 1a) | <b>Localised</b> |

Supplementary Figure 1B. Algorithm for mapping TNM stage to SEER stage

**Supplementary Table 1.** Age-standardised\* one- and three-year net survival (%) by stage at diagnosis (without imputation, presenting results of those with missing stage information) and country for non-small cell lung carcinoma patients diagnosed during 2010-2014, both sexes combined

| Stage                                 | Australia <sup>†</sup> | Canada <sup>†</sup> | Denmark            | Ireland <sup>†</sup> | New Zealand        | Norway             | United Kingdom <sup>†</sup> |
|---------------------------------------|------------------------|---------------------|--------------------|----------------------|--------------------|--------------------|-----------------------------|
| All patients                          | 50.4 (49.5 - 51.3)     | 52.9 (52.3 - 53.5)  | 49.3 (48.1 - 50.5) | 47.2 (45.7 - 48.7)   | 45.2 (43.6 - 46.7) | 50.5 (49.0 - 52.0) | 44.2 (43.8 - 44.6)          |
| <b>TNM Stage</b>                      |                        |                     |                    |                      |                    |                    |                             |
| Stage I                               |                        | 93.3 (92.6 - 93.9)  | 92.6 (90.7 - 94.1) | 91.5 (88.6 - 93.7)   |                    | 94.7 (92.7 - 96.2) | 90.8 (90.1 - 91.5)          |
| Stage II                              |                        | 81.9 (80.1 - 83.6)  | 87.2 (85.4 - 88.7) | 75.4 (71.4 - 78.9)   |                    | 85.0 (82.4 - 87.3) | 78.5 (77.3 - 79.6)          |
| Stage III                             |                        | 60.0 (58.6 - 61.3)  | 59.8 (57.3 - 62.2) | 50.0 (46.9 - 52.9)   |                    | 56.2 (52.6 - 59.6) | 52.3 (51.4 - 53.2)          |
| Stage IV                              |                        | 27.3 (26.5 - 28.0)  | 26.2 (24.8 - 27.6) | 22.4 (20.4 - 24.5)   |                    | 25.1 (23.1 - 27.1) | 21.9 (21.4 - 22.4)          |
| Missing                               |                        | 50.8 (48.5 - 53.0)  | 35.8 (29.8 - 41.8) | 41.7 (37.4 - 45.9)   |                    | 38.9 (35.6 - 42.1) | 40.9 (40.0 - 41.9)          |
| <b>Mapped SEER stage</b>              |                        |                     |                    |                      |                    |                    |                             |
| Localised                             | 83.7 (81.8 - 85.5)     | 92.9 (92.1 - 93.7)  | 90.2 (88.7 - 91.4) | 85.9 (83.7 - 87.8)   | 94.0 (90.5 - 96.2) | 84.6 (82.5 - 86.4) | 90.2 (89.6 - 90.8)          |
| Regional                              | 69.0 (66.9 - 71.0)     | 70.5 (69.5 - 71.4)  | 69.2 (67.2 - 71.2) | 53.9 (51.0 - 56.7)   | 66.1 (62.5 - 69.5) | 63.7 (61.4 - 66.0) | 62.4 (61.5 - 63.3)          |
| Distant                               | 27.1 (25.7 - 28.5)     | 27.4 (26.7 - 28.2)  | 27.6 (26.3 - 29.0) | 24.7 (22.8 - 26.7)   | 21.4 (19.6 - 23.4) | 24.1 (22.3 - 26.0) | 23.6 (23.1 - 24.1)          |
| Missing                               | 65.0 (61.7 - 68.0)     | 49.8 (47.3 - 52.1)  | 29.5 (21.0 - 38.4) | 37.9 (31.9 - 43.9)   | 55.1 (52.2 - 57.9) | 53.2 (44.3 - 61.2) | 33.1 (32.1 - 34.2)          |
| <b>1-year NS (95% CI)<sup>‡</sup></b> |                        |                     |                    |                      |                    |                    |                             |
| All patients                          | 26.4 (25.6 - 27.2)     | 31.0 (30.4 - 31.6)  | 26.4 (25.4 - 27.5) | 25.6 (24.4 - 27.0)   | 23.1 (21.7 - 24.4) | 28.1 (26.8 - 29.5) | 22.2 (21.9 - 22.5)          |
| <b>TNM Stage</b>                      |                        |                     |                    |                      |                    |                    |                             |
| Stage I                               |                        | 78.2 (77.1 - 79.4)  | 79.0 (76.0 - 81.7) | 76.5 (72.5 - 80.0)   |                    | 81.1 (77.8 - 84.0) | 71.9 (70.6 - 73.2)          |
| Stage II                              |                        | 57.8 (55.4 - 60.2)  | 66.1 (63.4 - 68.6) | 53.6 (49.9 - 57.2)   |                    | 58.9 (54.4 - 63.2) | 51.8 (50.2 - 53.4)          |
| Stage III                             |                        | 27.9 (26.6 - 29.2)  | 27.0 (24.9 - 29.2) | 20.1 (17.5 - 22.7)   |                    | 22.2 (18.9 - 25.5) | 20.3 (19.4 - 21.2)          |
| Stage IV                              |                        | 8.2 (7.7 - 8.7)     | 6.0 (5.2 - 6.8)    | 6.2 (5.2 - 7.4)      |                    | 5.7 (4.6 - 6.9)    | 5.1 (4.8 - 5.4)             |
| Missing                               |                        | 30.0 (28.1 - 31.9)  | 16.2 (11.1 - 22.2) | 18.7 (15.4 - 22.1)   |                    | 20.8 (18.3 - 23.5) | 20.1 (19.5 - 20.7)          |
| <b>Mapped SEER stage</b>              |                        |                     |                    |                      |                    |                    |                             |
| Localised                             | 65.3 (62.8 - 67.8)     | 78.3 (77.0 - 79.6)  | 74.5 (72.3 - 76.5) | 68.2 (65.4 - 70.8)   | 85.3 (79.6 - 89.5) | 67.6 (64.7 - 70.3) | 72.6 (71.6 - 73.6)          |
| Regional                              | 38.6 (36.5 - 40.8)     | 42.5 (41.4 - 43.6)  | 37.7 (35.4 - 40.0) | 26.5 (23.9 - 29.1)   | 38.0 (34.2 - 41.9) | 31.6 (28.9 - 34.4) | 32.0 (31.1 - 32.8)          |
| Distant                               | 8.0 (7.2 - 8.9)        | 8.3 (7.8 - 8.8)     | 6.8 (6.1 - 7.7)    | 6.8 (5.8 - 8.0)      | 7.0 (5.8 - 8.3)    | 6.4 (5.4 - 7.5)    | 5.6 (5.3 - 5.9)             |
| Missing                               | 28.3 (24.2 - 32.5)     | 29.1 (27.1 - 31.1)  | 14.6 (7.3 - 24.4)  | 15.0 (11.1 - 19.4)   | 22.4 (19.6 - 25.3) | 24.5 (15.4 - 34.9) | 12.2 (11.7 - 12.8)          |
| <b>3-year NS (95% CI)<sup>‡</sup></b> |                        |                     |                    |                      |                    |                    |                             |

<sup>‡</sup>NS = Net Survival; CI = Confidence Interval

<sup>†</sup>Australia includes New South Wales; Canada includes Alberta, British Columbia, New Brunswick, Manitoba, Newfoundland, Nova Scotia, Ontario, Prince Edward Island, and Saskatchewan; Ireland (2010-2013); United Kingdom includes England, Northern Ireland, Scotland, and Wales

\* Standard population used for age-standardisation is International Cancer Survival Standard (ICSS-1) derived in Corazziari et al. (2004)

**Supplementary Table 2.** Age-standardised<sup>o</sup> one- and three-year net survival (%) by stage at diagnosis (without imputation, presenting results of those with missing stage information) and country for small cell lung carcinoma patients diagnosed during 2010-2014, both sexes combined

|                                 | Stage              | Australia <sup>†</sup> | Canada <sup>†</sup> | Denmark            | Ireland <sup>†</sup> | New Zealand        | Norway             | United Kingdom <sup>†</sup> |  |
|---------------------------------|--------------------|------------------------|---------------------|--------------------|----------------------|--------------------|--------------------|-----------------------------|--|
|                                 | All patients       | 34.7 (32.4 - 37.0)     | 33.9 (32.3 - 35.4)  | 35.0 (32.3 - 37.8) | 30.7 (27.3 - 34.2)   | 29.4 (25.8 - 33.1) | 34.1 (30.9 - 37.3) | 28.1 (27.2 - 28.9)          |  |
| 1-year NS (95% CI) <sup>‡</sup> | TNM Stage          |                        |                     |                    |                      |                    |                    |                             |  |
|                                 | Stage I            |                        | 82.9 (76.7 - 87.6)  | 90.8 (71.2 - 97.3) | *                    |                    | 79.9 (60.2 - 90.5) | 76.9 (71.7 - 81.2)          |  |
|                                 | Stage II           |                        | 74.3 (67.4 - 79.9)  | 79.8 (68.7 - 87.3) | 69.8 (53.4 - 81.4)   |                    | 74.9 (60.9 - 84.5) | 66.4 (61.6 - 70.8)          |  |
|                                 | Stage III          |                        | 53.2 (50.5 - 55.8)  | 54.4 (49.3 - 59.3) | 43.6 (36.9 - 50.1)   |                    | 55.4 (48.7 - 61.6) | 46.8 (45.0 - 48.5)          |  |
|                                 | Stage IV           |                        | 20.0 (18.8 - 21.3)  | 24.2 (21.9 - 26.5) | 17.9 (14.7 - 21.2)   |                    | 19.7 (16.6 - 23.0) | 17.1 (16.3 - 17.9)          |  |
|                                 | Missing            |                        | 40.3 (34.0 - 46.5)  | 39.4 (26.8 - 51.8) | 40.5 (31.8 - 48.9)   |                    | 31.7 (27.3 - 36.2) | 27.1 (25.4 - 28.8)          |  |
|                                 | Mapped SEER stage  |                        |                     |                    |                      |                    |                    |                             |  |
|                                 | Localised          | 57.1 (47.7 - 65.3)     | 83.5 (76.2 - 88.7)  | 80.5 (68.6 - 88.3) | 65.4 (49.4 - 77.5)   | *                  | 65.8 (55.7 - 74.1) | 72.1 (67.3 - 76.3)          |  |
|                                 | Regional           | 61.6 (55.6 - 67.1)     | 56.6 (54.1 - 58.9)  | 62.2 (56.2 - 67.7) | 46.2 (39.9 - 52.3)   | 44.3 (34.7 - 53.4) | 57.8 (52.4 - 62.7) | 52.0 (49.9 - 53.9)          |  |
|                                 | Distant            | 21.3 (18.5 - 24.2)     | 20.2 (19.0 - 21.5)  | 26.5 (24.3 - 28.7) | 20.3 (17.2 - 23.7)   | 15.1 (12.0 - 18.5) | 17.8 (15.3 - 20.5) | 20.2 (19.5 - 21.0)          |  |
| Missing                         | 54.9 (45.2 - 63.6) | 34.0 (27.4 - 40.6)     | 32.9 (15.5 - 51.5)  | 39.0 (25.9 - 51.8) | 51.0 (44.1 - 57.4)   | 39.0 (23.1 - 54.6) | 27.2 (25.4 - 29.1) |                             |  |
| 3-year NS (95% CI) <sup>‡</sup> | All patients       | 10.0 (8.5 - 11.6)      | 11.4 (10.2 - 12.7)  | 9.7 (7.9 - 11.8)   | 9.1 (7.2 - 11.3)     | 9.2 (6.9 - 11.7)   | 11.3 (9.0 - 13.8)  | 7.7 (7.2 - 8.2)             |  |
|                                 | TNM Stage          |                        |                     |                    |                      |                    |                    |                             |  |
|                                 | Stage I            |                        | 52.9 (44.5 - 60.7)  | 62.8 (41.4 - 78.2) | *                    |                    | 47.6 (28.4 - 64.6) | 45.1 (38.4 - 51.5)          |  |
|                                 | Stage II           |                        | 36.4 (28.9 - 44.0)  | 49.4 (36.8 - 60.8) | 43.4 (28.8 - 57.1)   |                    | 42.7 (29.9 - 54.9) | 34.2 (29.0 - 39.4)          |  |
|                                 | Stage III          |                        | 20.3 (18.2 - 22.6)  | 21.5 (17.6 - 25.5) | 15.3 (11.2 - 19.9)   |                    | 23.4 (18.1 - 29.1) | 13.3 (12.0 - 14.7)          |  |
|                                 | Stage IV           |                        | 4.2 (3.6 - 4.8)     | 3.8 (2.9 - 4.9)    | 2.3 (1.4 - 3.7)      |                    | 2.1 (1.2 - 3.5)    | 2.7 (2.3 - 3.1)             |  |
|                                 | Missing            |                        | 17.0 (12.6 - 22.1)  | 9.1 (2.9 - 19.8)   | 12.1 (7.5 - 17.9)    |                    | 8.9 (6.5 - 11.8)   | 7.5 (6.8 - 8.3)             |  |
|                                 | Mapped SEER stage  |                        |                     |                    |                      |                    |                    |                             |  |
|                                 | Localised          | 26.5 (18.9 - 34.5)     | 48.0 (38.7 - 56.7)  | 52.1 (39.5 - 63.3) | 38.9 (25.1 - 52.5)   | *                  | 35.5 (26.8 - 44.3) | 41.8 (36.5 - 47.1)          |  |
|                                 | Regional           | 21.6 (17.2 - 26.3)     | 23.7 (21.6 - 25.9)  | 27.7 (22.7 - 33.0) | 19.5 (15.1 - 24.3)   | 17.1 (10.6 - 25.0) | 23.1 (18.9 - 27.6) | 17.5 (15.8 - 19.2)          |  |
| Distant                         | 3.8 (2.6 - 5.3)    | 4.2 (3.6 - 4.9)        | 5.1 (4.1 - 6.3)     | 2.8 (1.8 - 4.2)    | 3.7 (2.3 - 5.6)      | 1.8 (1.1 - 2.8)    | 3.8 (3.3 - 4.2)    |                             |  |
| Missing                         | 16.9 (10.5 - 24.7) | 13.4 (9.1 - 18.6)      | 11.7 (1.8 - 31.6)   | 10.1 (4.1 - 19.3)  | 16.1 (11.5 - 21.5)   | 10.3 (2.2 - 25.7)  | 7.3 (6.6 - 8.1)    |                             |  |

<sup>‡</sup>NS = Net Survival; CI = Confidence Interval

<sup>†</sup>Australia includes New South Wales; Canada includes Alberta, British Columbia, New Brunswick, Manitoba, Newfoundland, Nova Scotia, Ontario, Prince Edward Island, and Saskatchewan; Ireland (2010-2013); United Kingdom includes England, Northern Ireland, Scotland, and Wales

\* <30 patients

<sup>o</sup> Standard population used for age-standardisation is International Cancer Survival Standard (ICSS-1) derived in Corazziari et al. (2004)

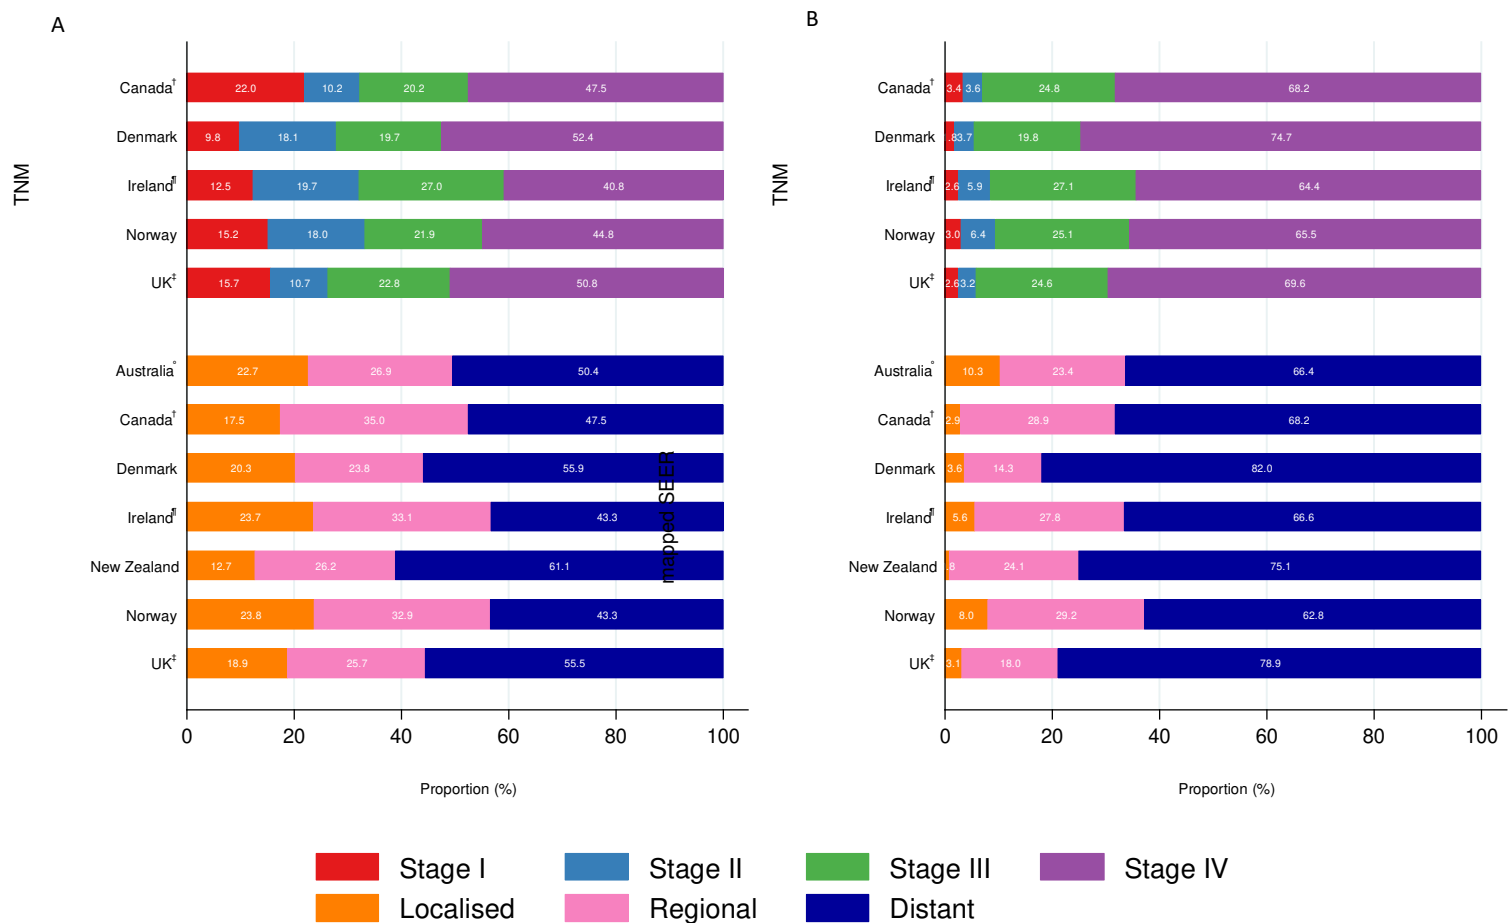

<sup>†</sup> Canadian provinces included: Alberta, British Columbia, New Brunswick, Manitoba, Newfoundland, Nova Scotia, Ontario, Prince Edward Island, and Saskatchewan

<sup>‡</sup> United Kingdom registries included: England, Northern Ireland, Scotland, and Wales

<sup>°</sup> Australia registries included: New South Wales

<sup>¶</sup> Ireland: 2010-2013

**Supplementary Figure 2.** Distribution of (imputed) stage at diagnosis of A) non-small cell lung carcinoma and B) small cell lung carcinoma for both sexes combined by country, 2010-2014

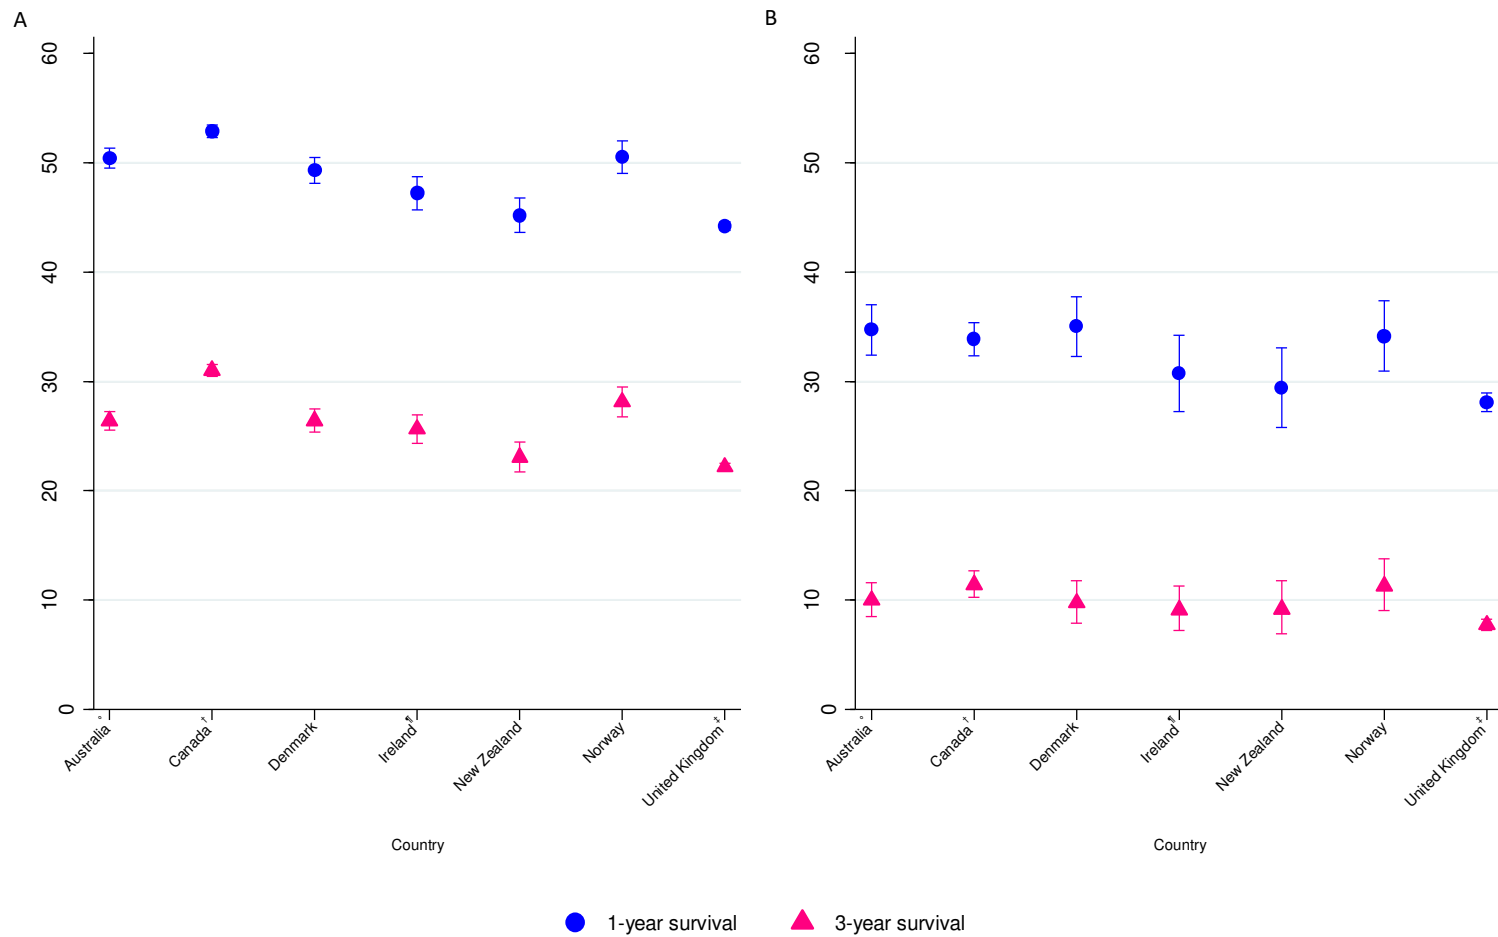

† Canadian provinces included: Alberta, British Columbia, New Brunswick, Manitoba, Newfoundland, Nova Scotia, Ontario, Prince Edward Island, and Saskatchewan

‡ United Kingdom registries included: England, Northern Ireland, Scotland, and Wales

° Australia registries included: New South Wales

¶ Ireland: 2010-2013

\* Standard population used for age-standardisation is International Cancer Survival Standard (ICSS-1) derived in Corazziari et al. (2004)

**Supplementary Figure 3.** One- and three-year overall age-standardised\* net survival of A) non-small cell lung carcinoma and B) small cell lung carcinoma by country for both sexes combined, 2010-2014

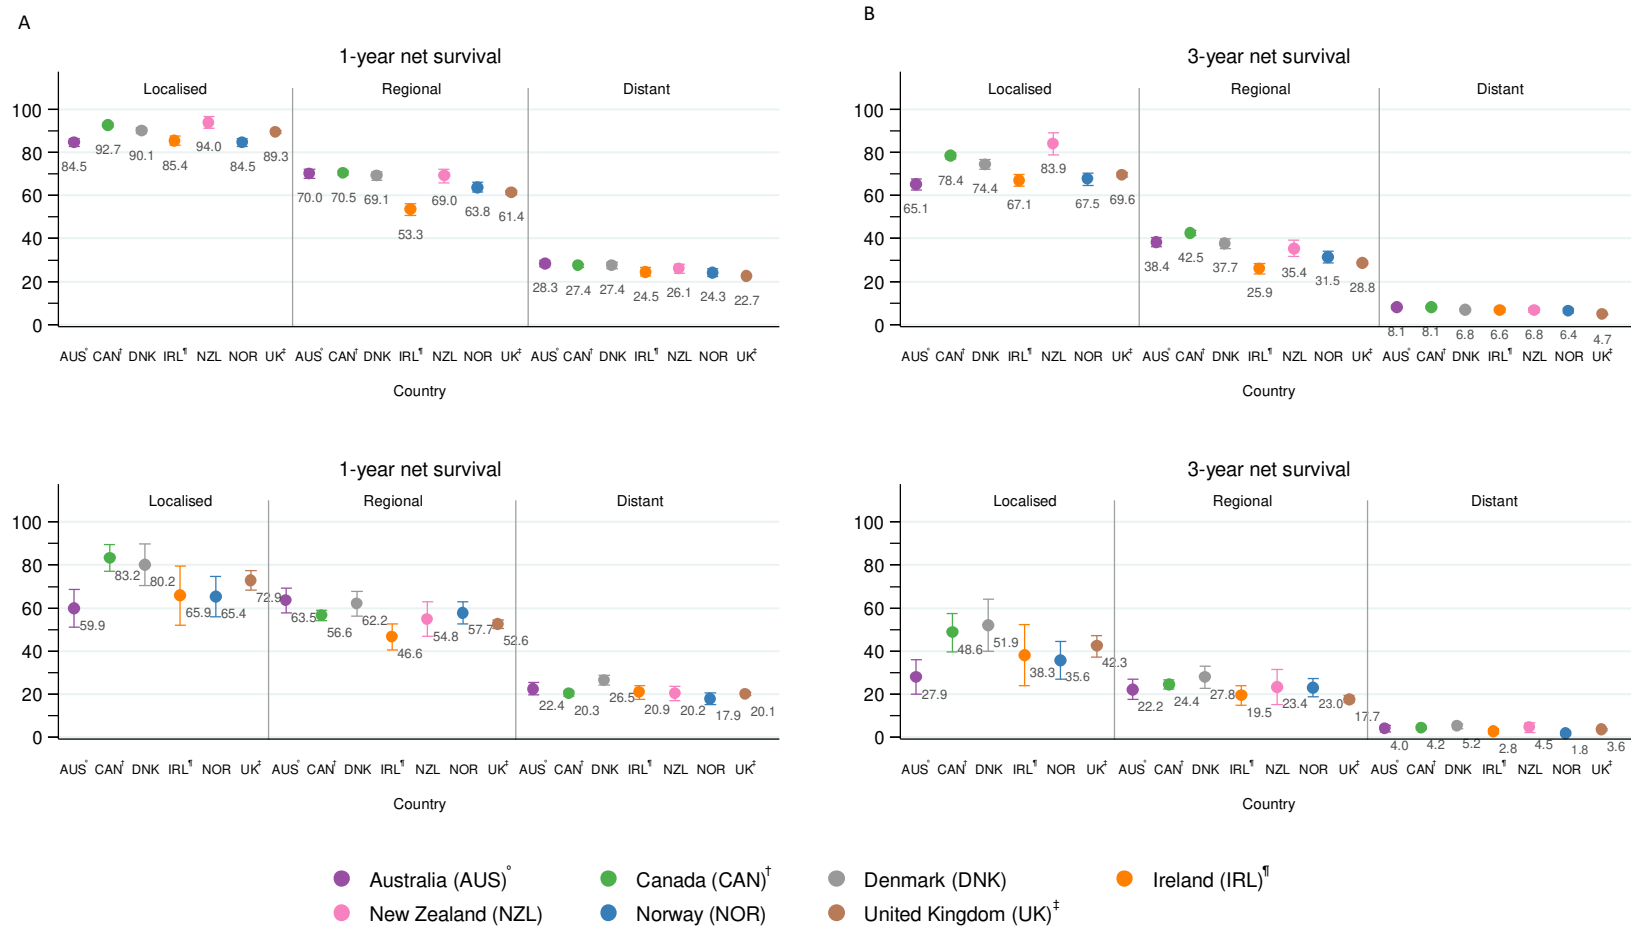

<sup>†</sup> Canadian provinces included: Alberta, British Columbia, New Brunswick, Manitoba, Newfoundland, Nova Scotia, Ontario, Prince Edward Island, and Saskatchewan

<sup>‡</sup> United Kingdom registries included: England, Northern Ireland, Scotland, and Wales

<sup>o</sup> Australia registries included: New South Wales

<sup>¶</sup> Ireland: 2010-2013

\* Standard population used for age-standardisation is International Cancer Survival Standard (ICSS-1) derived in Corazziari et al. (2004)

**Supplementary Figure 4.** One- and three-year age-standardised\* net survival of A) non-small cell lung carcinoma and B) small cell lung carcinoma by (imputed) SEER stage and country for both sexes combined, 2010-2014

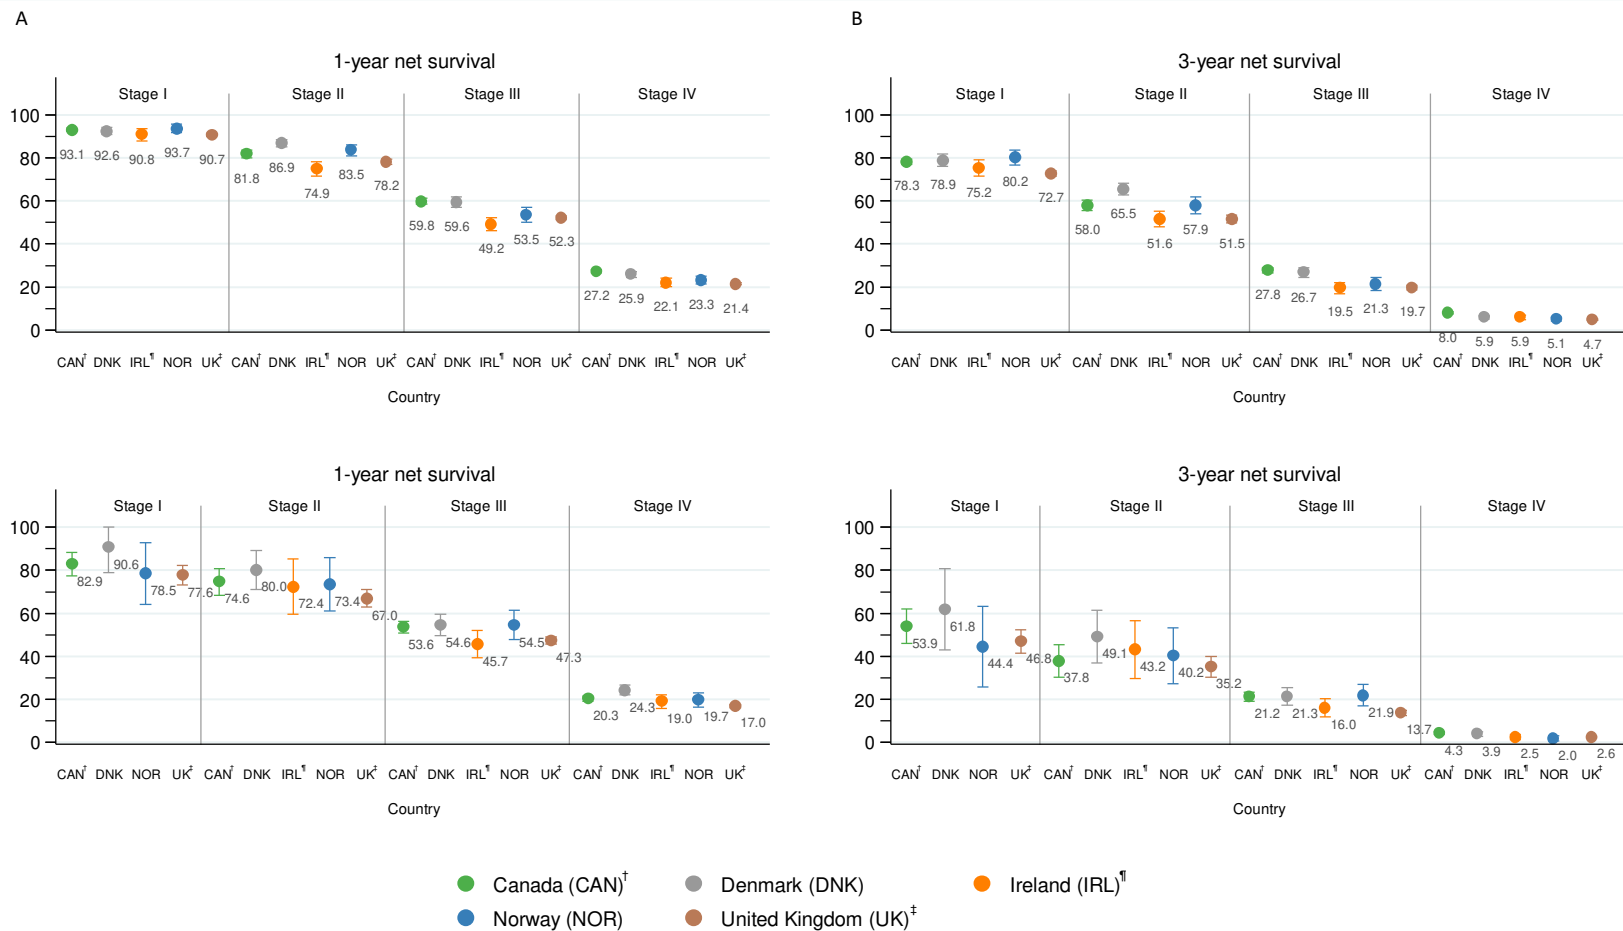

Canadian provinces included: Alberta, British Columbia, New Brunswick, Manitoba, Newfoundland, Nova Scotia, Ontario, Prince Edward Island, and Saskatchewan

<sup>‡</sup> United Kingdom registries included: England, Northern Ireland, Scotland, and Wales

<sup>°</sup> Australia registries included: New South Wales

<sup>¶</sup> Ireland: 2010-2013

\* Standard population used for age-standardisation is International Cancer Survival Standard (ICSS-1) derived in Corazziari et al. (2004)

**Supplementary Figure 5.** One- and three-year age-standardised\* net survival of A) non-small cell lung carcinoma and B) small cell lung carcinoma by (imputed) TNM stage and country for both sexes combined, 2010-2014



**Supplementary Table 3.** Number and proportion of patients with non-small cell lung carcinoma (NSCLC) and small cell lung carcinoma (SCLC) diagnosed during 2010-2014 both sexes combined by country and stage at diagnosis (TNM and SEER), before and after imputation

|                             | TNM stage    |            |                         |          | Mapped SEER      |            |                         |          |                  |              |         |                         |          |                  |        |                         |          |                  |
|-----------------------------|--------------|------------|-------------------------|----------|------------------|------------|-------------------------|----------|------------------|--------------|---------|-------------------------|----------|------------------|--------|-------------------------|----------|------------------|
|                             | NSCLC        |            | %                       |          | SCLC             |            | %                       |          | NSCLC            |              | %       |                         | SCLC     |                  | %      |                         |          |                  |
|                             | Stage        | Number     | Median age at diagnosis | Observed | After imputation | Number     | Median age at diagnosis | Observed | After imputation | Stage        | Number  | Median age at diagnosis | Observed | After imputation | Number | Median age at diagnosis | Observed | After imputation |
| Australia <sup>†</sup>      | All patients |            |                         |          |                  |            |                         |          |                  | All patients | 13,115  | 70 (63-77)              |          |                  | 1,971  | 69 (62-77)              |          |                  |
|                             | Missing      |            |                         |          |                  |            |                         |          |                  | Missing      | 1,356   | 73 (65-81)              | 10.3     |                  | 158    | 71 (62-78)              | 8.0      |                  |
|                             | I            |            |                         |          |                  |            |                         |          |                  | Localised    | 2,514   | 71 (65-78)              | 21.4     | 22.7             | 169    | 71 (61-78)              | 9.3      | 10.3             |
|                             | II           |            |                         |          |                  |            |                         |          |                  | Regional     | 3,145   | 70 (63-77)              | 26.7     | 26.9             | 436    | 69 (62-76)              | 24.0     | 23.4             |
|                             | III          |            |                         |          |                  |            |                         |          |                  | Distant      | 6,100   | 69 (61-77)              | 51.9     | 50.4             | 1,208  | 69 (62-76)              | 66.6     | 66.4             |
| Canada <sup>‡</sup>         | All patients | 59,969     | 70 (62-77)              |          |                  | 9,671      | 69 (61-75)              |          |                  | All patients | 59,969  | 70 (62-77)              |          |                  | 9,671  | 69 (61-75)              |          |                  |
|                             | Missing      | 3,690      | 71 (63-78)              | 6.2      |                  | 391        | 70 (63-76)              | 4.0      |                  | Missing      | 3,220   | 71 (62-78)              | 5.4      |                  | 328    | 69 (63-76)              | 3.4      |                  |
|                             | I            | 11,822     | 71 (64-77)              | 21.0     | 22.0             | 281        | 72 (64-78)              | 3.0      | 3.4              | Localised    | 9,361   | 71 (64-77)              | 16.5     | 17.5             | 236    | 73 (65-78)              | 2.4      | 2.9              |
|                             | II           | 5,714      | 71 (63-77)              | 10.2     | 10.2             | 315        | 70 (63-76)              | 3.4      | 3.6              | Regional     | 19,833  | 70 (63-77)              | 34.9     | 35.0             | 2,595  | 68 (61-75)              | 26.8     | 28.9             |
|                             | III          | 11,387     | 70 (62-76)              | 20.2     | 20.2             | 2,213      | 68 (61-75)              | 23.8     | 24.8             | Distant      | 27,555  | 69 (61-77)              | 48.6     | 47.5             | 6,512  | 68 (61-75)              | 67.3     | 68.2             |
| Denmark                     | All patients | 15,590     | 69 (63-76)              |          |                  | 2,991      | 69 (63-76)              |          |                  | All patients | 15,590  | 69 (63-76)              |          |                  | 2,991  | 69 (63-76)              |          |                  |
|                             | Missing      | 396        | 73 (65-79)              | 2.5      |                  | 84         | 72 (63-81)              | 2.8      |                  | Missing      | 176     | 72 (65-80)              | 1.1      |                  | 34     | 74 (64-82)              | 1.1      |                  |
|                             | I            | 1,348      | 70 (64-76)              | 8.9      | 9.8              | 46         | 68 (59-74)              | 1.6      | 1.8              | Localised    | 2,915   | 70 (64-76)              | 18.9     | 20.3             | 102    | 70 (61-75)              | 3.4      | 3.6              |
|                             | II           | 2,641      | 70 (64-76)              | 17.4     | 18.1             | 107        | 69 (64-76)              | 3.7      | 3.7              | Regional     | 3,729   | 69 (63-76)              | 24.2     | 23.8             | 438    | 69 (62-76)              | 14.8     | 14.3             |
|                             | III          | 3,200      | 69 (63-76)              | 20.6     | 19.7             | 598        | 69 (62-75)              | 20.6     | 19.8             | Distant      | 8,770   | 69 (62-76)              | 56.9     | 55.9             | 2,417  | 69 (63-76)              | 81.7     | 82.0             |
| Ireland <sup>§</sup>        | All patients | 6,006      | 69 (62-76)              |          |                  | 1,089      | 67 (61-75)              |          |                  | All patients | 6,006   | 69 (62-76)              |          |                  | 1,089  | 67 (61-75)              |          |                  |
|                             | Missing      | 803        | 73 (65-80)              | 13.4     |                  | 175        | 71 (62-77)              | 16.1     |                  | Missing      | 406     | 73 (65-80)              | 6.8      |                  | 84     | 73 (62-78)              | 7.7      |                  |
|                             | I            | 644        | 70 (63-76)              | 12.4     | 12.5             | 20         | 65 (58-76)              | 2.2      | 2.6              | Localised    | 1,283   | 70 (64-77)              | 22.9     | 23.7             | 50     | 67 (60-75)              | 5.0      | 5.6              |
|                             | II           | 1,020      | 70 (63-76)              | 19.6     | 19.7             | 51         | 68 (63-80)              | 5.6      | 5.9              | Regional     | 1,888   | 70 (63-76)              | 33.7     | 33.1             | 286    | 69 (62-75)              | 28.5     | 27.8             |
|                             | III          | 1,405      | 69 (62-76)              | 27.0     | 27.0             | 242        | 67 (61-74)              | 26.5     | 27.1             | Distant      | 2,429   | 68 (61-75)              | 43.4     | 43.3             | 669    | 67 (60-74)              | 66.6     | 66.6             |
| New Zealand                 | All patients | 2,134      | 68 (61-75)              | 41.0     | 40.8             | 601        | 67 (61-74)              | 65.8     | 64.4             | All patients | 6,619   | 69 (62-76)              |          |                  | 1,185  | 68 (60-74)              |          |                  |
|                             | Missing      |            |                         |          |                  |            |                         |          |                  | Missing      | 2,085   | 71 (64-78)              | 31.5     |                  | 321    | 68 (60-75)              | 27.1     |                  |
|                             | I            |            |                         |          |                  |            |                         |          |                  | Localised    | 532     | 68 (63-74)              | 11.7     | 12.7             | 6      | 70 (61-77)              | 0.7      | 0.8              |
|                             | II           |            |                         |          |                  |            |                         |          |                  | Regional     | 1,014   | 69 (61-74)              | 22.4     | 26.2             | 153    | 67 (59-74)              | 17.7     | 24.1             |
|                             | III          |            |                         |          |                  |            |                         |          |                  | Distant      | 2,988   | 68 (60-76)              | 65.9     | 61.1             | 705    | 67 (60-74)              | 81.6     | 75.1             |
| Norway                      | All patients | 9,414      | 69 (63-77)              |          |                  | 2,097      | 69 (62-76)              |          |                  | All patients | 9,414   | 69 (62-76)              |          |                  | 2,097  | 69 (62-76)              |          |                  |
|                             | Missing      | 2,062      | 70 (63-78)              | 21.9     |                  | 684        | 68 (62-75)              | 32.6     |                  | Missing      | 202     | 73 (65-80)              | 2.1      |                  | 65     | 73 (67-79)              | 3.1      |                  |
|                             | I            | 1,103      | 69 (64-76)              | 15.0     | 15.2             | 42         | 69 (62-75)              | 3.0      | 3.0              | Localised    | 2,234   | 70 (64-77)              | 24.3     | 23.8             | 165    | 70 (61-77)              | 8.1      | 8.0              |
|                             | II           | 1,411      | 69 (64-76)              | 19.2     | 18.0             | 94         | 69 (62-76)              | 6.7      | 6.4              | Regional     | 2,932   | 69 (63-76)              | 31.8     | 32.9             | 556    | 67 (61-74)              | 27.4     | 29.2             |
|                             | III          | 1,694      | 70 (63-77)              | 23.0     | 21.9             | 353        | 67 (61-74)              | 25.0     | 25.1             | Distant      | 4,046   | 69 (62-76)              | 43.9     | 43.3             | 1,311  | 69 (63-76)              | 64.5     | 62.8             |
| United Kingdom <sup>‡</sup> | All patients | 125,401    | 71 (64-77)              |          |                  | 24,163     | 69 (62-76)              |          |                  | All patients | 125,401 | 71 (64-77)              |          |                  | 24,163 | 69 (62-76)              |          |                  |
|                             | Missing      | 41,801     | 71 (64-78)              | 33.3     |                  | 8,110      | 69 (62-76)              | 33.6     |                  | Missing      | 32,423  | 72 (64-79)              | 25.9     |                  | 7,177  | 69 (62-76)              | 29.7     |                  |
|                             | I            | 12,653     | 71 (65-77)              | 15.1     | 15.7             | 384        | 70 (63-77)              | 2.4      | 2.6              | Localised    | 18,809  | 71 (65-77)              | 20.2     | 18.9             | 540    | 70 (63-77)              | 3.2      | 3.1              |
|                             | II           | 9,186      | 71 (65-77)              | 11.0     | 10.7             | 528        | 70 (64-76)              | 3.3      | 3.2              | Regional     | 24,785  | 71 (64-77)              | 26.7     | 25.7             | 3,119  | 69 (63-75)              | 18.4     | 18.0             |
|                             | III          | 19,280     | 70 (64-77)              | 23.1     | 22.8             | 3,898      | 69 (62-75)              | 24.3     | 24.6             | Distant      | 49,384  | 70 (63-77)              | 53.1     | 55.5             | 13,327 | 69 (62-76)              | 78.5     | 78.9             |
| IV                          | 42,481       | 70 (63-77) | 50.8                    | 50.8     | 11,243           | 69 (62-76) | 70.0                    | 69.6     |                  |              |         |                         |          |                  |        |                         |          |                  |

<sup>†</sup> Canadian provinces included: Alberta, British Columbia, New Brunswick, Manitoba, Newfoundland, Nova Scotia, Ontario, Prince Edward Island, and Saskatchewan<sup>‡</sup> United Kingdom registries included: England, Northern Ireland, Scotland, and Wales<sup>§</sup> Australia registries included: New South Wales<sup>¶</sup> Ireland: 2010-2013

**Supplementary Table 4.** Age-standardised\* one- and three-year net survival (%) by (imputed) stage at diagnosis and country for non-small cell lung carcinoma patients diagnosed during 2010-2014, both sexes combined

| Stage                    | Australia <sup>†</sup> | Canada <sup>†</sup> | Denmark            | Ireland <sup>†</sup> | New Zealand        | Norway             | United Kingdom <sup>†</sup> |
|--------------------------|------------------------|---------------------|--------------------|----------------------|--------------------|--------------------|-----------------------------|
| All patients             | 50.4 (49.5 - 51.3)     | 52.9 (52.3 - 53.5)  | 49.3 (48.1 - 50.5) | 47.2 (45.7 - 48.7)   | 45.2 (43.6 - 46.7) | 50.5 (49.0 - 52.0) | 44.2 (43.8 - 44.6)          |
| <b>TNM Stage</b>         |                        |                     |                    |                      |                    |                    |                             |
| Stage I                  |                        | 93.1 (92.4 - 93.8)  | 92.6 (90.8 - 94.3) | 90.8 (87.9 - 93.6)   |                    | 93.7 (91.7 - 95.8) | 90.7 (90.0 - 91.4)          |
| Stage II                 |                        | 81.8 (80.1 - 83.6)  | 86.9 (85.2 - 88.6) | 74.9 (71.4 - 78.3)   |                    | 83.5 (80.9 - 86.2) | 78.2 (77.0 - 79.4)          |
| Stage III                |                        | 59.8 (58.5 - 61.1)  | 59.6 (57.1 - 62.0) | 49.2 (46.2 - 52.3)   |                    | 53.5 (50.0 - 57.0) | 52.3 (51.5 - 53.2)          |
| Stage IV                 |                        | 27.2 (26.5 - 28.0)  | 25.9 (24.5 - 27.3) | 22.1 (20.2 - 24.1)   |                    | 23.3 (21.5 - 25.1) | 21.4 (21.0 - 21.9)          |
| <b>Mapped SEER stage</b> |                        |                     |                    |                      |                    |                    |                             |
| Localised                | 84.5 (82.7 - 86.3)     | 92.7 (91.8 - 93.5)  | 90.1 (88.7 - 91.5) | 85.4 (83.2 - 87.5)   | 94.0 (91.2 - 96.7) | 84.5 (82.6 - 86.5) | 89.3 (88.7 - 89.9)          |
| Regional                 | 70.0 (68.1 - 72.0)     | 70.5 (69.5 - 71.4)  | 69.1 (67.1 - 71.1) | 53.3 (50.6 - 56.1)   | 69.0 (65.8 - 72.2) | 63.8 (61.5 - 66.1) | 61.4 (60.5 - 62.2)          |
| Distant                  | 28.3 (26.9 - 29.8)     | 27.4 (26.6 - 28.1)  | 27.4 (26.1 - 28.8) | 24.5 (22.5 - 26.4)   | 26.1 (24.0 - 28.2) | 24.3 (22.4 - 26.1) | 22.7 (22.3 - 23.1)          |
| All patients             | 26.4 (25.6 - 27.2)     | 31.0 (30.4 - 31.6)  | 26.4 (25.4 - 27.5) | 25.6 (24.4 - 27.0)   | 23.1 (21.7 - 24.4) | 28.1 (26.8 - 29.5) | 22.2 (21.9 - 22.5)          |
| <b>TNM Stage</b>         |                        |                     |                    |                      |                    |                    |                             |
| Stage I                  |                        | 78.3 (77.1 - 79.6)  | 78.9 (76.0 - 81.8) | 75.2 (71.4 - 79.0)   |                    | 80.2 (76.7 - 83.6) | 72.7 (71.4 - 74.0)          |
| Stage II                 |                        | 58.0 (55.6 - 60.3)  | 65.5 (62.7 - 68.2) | 51.6 (48.0 - 55.3)   |                    | 57.9 (53.9 - 61.9) | 51.5 (49.7 - 53.4)          |
| Stage III                |                        | 27.8 (26.5 - 29.1)  | 26.7 (24.5 - 28.9) | 19.5 (16.9 - 22.1)   |                    | 21.3 (18.3 - 24.4) | 19.7 (18.7 - 20.7)          |
| Stage IV                 |                        | 8.0 (7.5 - 8.5)     | 5.9 (5.1 - 6.7)    | 5.9 (4.8 - 7.0)      |                    | 5.1 (4.1 - 6.1)    | 4.7 (4.4 - 4.9)             |
| <b>Mapped SEER stage</b> |                        |                     |                    |                      |                    |                    |                             |
| Localised                | 65.1 (62.6 - 67.6)     | 78.4 (77.1 - 79.7)  | 74.4 (72.2 - 76.5) | 67.1 (64.4 - 69.9)   | 83.9 (78.7 - 89.2) | 67.5 (64.7 - 70.3) | 69.6 (68.6 - 70.5)          |
| Regional                 | 38.4 (36.3 - 40.5)     | 42.5 (41.4 - 43.7)  | 37.7 (35.4 - 40.0) | 25.9 (23.5 - 28.4)   | 35.4 (31.6 - 39.2) | 31.5 (28.8 - 34.2) | 28.8 (28.0 - 29.6)          |
| Distant                  | 8.1 (7.2 - 8.9)        | 8.1 (7.5 - 8.6)     | 6.8 (6.0 - 7.5)    | 6.6 (5.5 - 7.7)      | 6.8 (5.6 - 7.9)    | 6.4 (5.3 - 7.5)    | 4.7 (4.4 - 4.9)             |

<sup>†</sup>NS = Net Survival; CI = Confidence Interval

<sup>†</sup>Australia includes New South Wales; Canada includes Alberta, British Columbia, New Brunswick, Manitoba, Newfoundland, Nova Scotia, Ontario, Prince Edward Island, and Saskatchewan; Ireland (2010-2013); United Kingdom includes England, Northern Ireland, Scotland, and Wales

\* Standard population used for age-standardisation is International Cancer Survival Standard (ICSS-1) derived in Corazziari et al. (2004)

**Supplementary Table 5.** Age-standardised<sup>o</sup> one- and three-year net survival (%) by (imputed) stage at diagnosis and country for small cell lung carcinoma patients diagnosed during 2010-2014, both sexes combined

|                                 | Stage                           | Australia <sup>†</sup> | Canada <sup>†</sup> | Denmark             | Ireland <sup>†</sup> | New Zealand        | Norway             | United Kingdom <sup>†</sup> |                 |
|---------------------------------|---------------------------------|------------------------|---------------------|---------------------|----------------------|--------------------|--------------------|-----------------------------|-----------------|
|                                 | All patients                    | 34.7 (32.4 - 37.0)     | 33.9 (32.3 - 35.4)  | 35.0 (32.3 - 37.8)  | 30.7 (27.3 - 34.2)   | 29.4 (25.8 - 33.1) | 34.1 (30.9 - 37.3) | 28.1 (27.2 - 28.9)          |                 |
| 1-year NS (95% CI) <sup>‡</sup> | TNM Stage                       |                        |                     |                     |                      |                    |                    |                             |                 |
|                                 | Stage I                         |                        | 82.9 (77.6 - 88.3)  | 90.6 (79.0 - 100.0) | *                    |                    | 78.5 (64.1 - 93.0) | 77.6 (73.0 - 82.1)          |                 |
|                                 | Stage II                        |                        | 74.6 (68.4 - 80.8)  | 80.0 (71.0 - 89.1)  | 72.4 (59.4 - 85.3)   |                    | 73.4 (61.0 - 85.9) | 67.0 (62.8 - 71.2)          |                 |
|                                 | Stage III                       |                        | 53.6 (51.0 - 56.2)  | 54.6 (49.6 - 59.6)  | 45.7 (39.4 - 52.1)   |                    | 54.5 (47.8 - 61.3) | 47.3 (45.7 - 49.0)          |                 |
|                                 | Stage IV                        |                        | 20.3 (19.0 - 21.5)  | 24.3 (22.0 - 26.6)  | 19.0 (15.7 - 22.2)   |                    | 19.7 (16.5 - 22.9) | 17.0 (16.2 - 17.7)          |                 |
|                                 | Mapped SEER stage               |                        |                     |                     |                      |                    |                    |                             |                 |
|                                 | Localised                       | 59.9 (51.1 - 68.7)     | 83.2 (77.1 - 89.4)  | 80.2 (70.4 - 89.9)  | 65.9 (52.1 - 79.7)   | *                  | 65.4 (56.1 - 74.8) | 72.9 (68.5 - 77.4)          |                 |
|                                 | Regional                        | 63.5 (57.8 - 69.2)     | 56.6 (54.2 - 59.0)  | 62.2 (56.4 - 67.9)  | 46.6 (40.5 - 52.7)   | 54.8 (46.9 - 62.8) | 57.7 (52.7 - 62.8) | 52.6 (50.6 - 54.6)          |                 |
|                                 | Distant                         | 22.4 (19.6 - 25.3)     | 20.3 (19.1 - 21.5)  | 26.5 (24.3 - 28.7)  | 20.9 (17.7 - 24.1)   | 20.2 (16.9 - 23.5) | 17.9 (15.3 - 20.5) | 20.1 (19.4 - 20.8)          |                 |
|                                 | 3-year NS (95% CI) <sup>‡</sup> | All patients           | 10.0 (8.5 - 11.6)   | 11.4 (10.2 - 12.7)  | 9.7 (7.9 - 11.8)     | 9.1 (7.2 - 11.3)   | 9.2 (6.9 - 11.7)   | 11.3 (9.0 - 13.8)           | 7.7 (7.2 - 8.2) |
| TNM Stage                       |                                 |                        |                     |                     |                      |                    |                    |                             |                 |
| Stage I                         |                                 |                        | 53.9 (45.9 - 61.9)  | 61.8 (42.9 - 80.7)  | *                    |                    | 44.4 (25.7 - 63.2) | 46.8 (41.4 - 52.3)          |                 |
| Stage II                        |                                 |                        | 37.8 (30.4 - 45.3)  | 49.1 (37.0 - 61.2)  | 43.2 (29.7 - 56.7)   |                    | 40.2 (27.1 - 53.2) | 35.2 (30.4 - 39.9)          |                 |
| Stage III                       |                                 |                        | 21.2 (19.0 - 23.4)  | 21.3 (17.4 - 25.3)  | 16.0 (11.7 - 20.3)   |                    | 21.9 (16.9 - 26.9) | 13.7 (12.5 - 14.8)          |                 |
| Stage IV                        |                                 |                        | 4.3 (3.7 - 4.9)     | 3.9 (2.8 - 4.9)     | 2.5 (1.3 - 3.7)      |                    | 2.0 (0.8 - 3.2)    | 2.6 (2.2 - 2.9)             |                 |
| Mapped SEER stage               |                                 |                        |                     |                     |                      |                    |                    |                             |                 |
| Localised                       |                                 | 27.9 (20.0 - 35.9)     | 48.6 (39.7 - 57.5)  | 51.9 (39.9 - 64.0)  | 38.3 (24.1 - 52.4)   | *                  | 35.6 (26.8 - 44.4) | 42.3 (37.2 - 47.3)          |                 |
| Regional                        |                                 | 22.2 (17.6 - 26.9)     | 24.4 (22.3 - 26.6)  | 27.8 (22.6 - 32.9)  | 19.5 (15.0 - 23.9)   | 23.4 (15.1 - 31.6) | 23.0 (18.7 - 27.3) | 17.7 (16.1 - 19.3)          |                 |
| Distant                         |                                 | 4.0 (2.5 - 5.4)        | 4.2 (3.6 - 4.8)     | 5.2 (4.1 - 6.2)     | 2.8 (1.6 - 4.0)      | 4.5 (2.3 - 6.6)    | 1.8 (1.0 - 2.7)    | 3.6 (3.2 - 4.0)             |                 |

<sup>‡</sup>NS = Net Survival; CI = Confidence Interval

<sup>†</sup>Australia includes New South Wales; Canada includes Alberta, British Columbia, New Brunswick, Manitoba, Newfoundland, Nova Scotia, Ontario, Prince Edward Island, and Saskatchewan; Ireland (2010-2013); United Kingdom includes England, Northern Ireland, Scotland, and Wales

\* <30 patients

<sup>o</sup> Standard population used for age-standardisation is International Cancer Survival Standard (ICSS-1) derived in Corazziari et al. (2004)

**Supplementary Table 6.** Number and proportion of patients with non-small cell lung carcinoma (NSCLC) and small cell lung carcinoma (SCLC) diagnosed during 2010-2014 by jurisdiction and stage at diagnosis (TNM and map SEER) for both sexes combined, before and after imputation

|                              | TNM stage    | NSCLC      |            |                         |          | SCLC       |                  |                         |        | Mapped SEER  |          |                  |        |                         |          |                  |                         |          |
|------------------------------|--------------|------------|------------|-------------------------|----------|------------|------------------|-------------------------|--------|--------------|----------|------------------|--------|-------------------------|----------|------------------|-------------------------|----------|
|                              |              | Stage      | Number     | %                       |          | Number     | %                |                         | Stage  | Number       | %        |                  | Number | %                       |          |                  |                         |          |
|                              |              |            |            | Median age at diagnosis | Observed |            | After imputation | Median age at diagnosis |        |              | Observed | After imputation |        | Median age at diagnosis | Observed | After imputation | Median age at diagnosis | Observed |
| Canada, Alberta              | All patients | 6,817      | 69 (62-76) |                         |          | 1,197      | 68 (61-76)       |                         |        | All patients | 6,817    | 69 (62-76)       |        |                         | 1,197    | 68 (61-76)       |                         |          |
|                              | Missing      | 65         | 75 (67-82) | 1.0                     |          | 6          | 79 (77-84)       | 0.5                     |        | Missing      | 13       | 70 (60-84)       | 0.2    |                         | 2        | 77 (76-77)       | 0.2                     |          |
|                              | I            | 1,373      | 70 (63-77) | 20.3                    | 21.4     | 50         | 72 (62-78)       | 4.2                     | 5.1    | Localised    | 991      | 71 (64-77)       | 14.6   | 15.2                    | 36       | 71 (63-76)       | 3.0                     | 3.6      |
|                              | II           | 616        | 71 (63-77) | 9.1                     | 9.3      | 44         | 72 (64-78)       | 3.7                     | 4.4    | Regional     | 2,288    | 70 (63-76)       | 33.6   | 34.0                    | 313      | 68 (60-76)       | 26.2                    | 29.8     |
|                              | III          | 1,242      | 70 (63-76) | 18.4                    | 18.2     | 251        | 67 (60-74)       | 21.1                    | 23.8   | Distant      | 3,525    | 69 (61-76)       | 51.8   | 50.8                    | 846      | 68 (61-76)       | 70.8                    | 66.6     |
| IV                           | 3,521        | 69 (61-76) | 52.1       | 51.0                    | 846      | 68 (61-76) | 71.0             | 66.7                    |        |              |          |                  |        |                         |          |                  |                         |          |
| Canada, British Columbia     | All patients | 10,262     | 70 (63-78) |                         |          | 1,510      | 69 (62-76)       |                         |        | All patients | 10,262   | 70 (63-78)       |        |                         | 1,510    | 69 (62-76)       |                         |          |
|                              | Missing      | 484        | 75 (67-82) | 4.7                     |          | 51         | 72 (64-78)       | 3.4                     |        | Missing      | 317      | 76 (69-82)       | 3.1    |                         | 40       | 72 (65-78)       | 2.6                     |          |
|                              | I            | 1,759      | 71 (64-77) | 18.0                    | 19.8     | 34         | 66 (61-76)       | 2.3                     | 2.4    | Localised    | 1,168    | 71 (64-78)       | 11.7   | 12.8                    | 21       | 75 (62-79)       | 1.4                     | 1.4 *    |
|                              | II           | 892        | 71 (64-77) | 9.1                     | 9.2      | 52         | 69 (63-76)       | 3.6                     | 3.1    | Regional     | 3,740    | 71 (64-78)       | 37.6   | 37.5                    | 474      | 69 (62-76)       | 32.2                    | 32.2 *   |
|                              | III          | 2,099      | 71 (63-78) | 21.5                    | 20.8     | 398        | 69 (62-76)       | 27.3                    | 26.7   | Distant      | 5,037    | 69 (61-77)       | 50.6   | 49.6                    | 975      | 69 (62-76)       | 66.3                    | 66.3 *   |
| IV                           | 5,028        | 69 (61-77) | 51.4       | 50.2                    | 975      | 69 (62-76) | 66.8             | 67.9                    |        |              |          |                  |        |                         |          |                  |                         |          |
| Canada, Manitoba             | All patients | 2,464      | 69 (62-76) |                         |          | 439        | 68 (61-74)       |                         |        | All patients | 2,464    | 69 (62-76)       |        |                         | 439      | 68 (61-74)       |                         |          |
|                              | Missing      | 14         | 69 (54-79) | 0.6                     |          | 15         | 73 (66-79)       | 3.4                     |        | Missing      | 1        | 54 (54-54)       | 0.0    |                         | 1        | 65 (65-65)       | 0.2                     |          |
|                              | I            | 368        | 70 (63-76) | 15.0                    | 15.4     | 13         | 72 (67-77)       | 3.1                     | 3.1 *  | Localised    | 537      | 70 (63-76)       | 21.8   | 23.0                    | 19       | 74 (69-77)       | 4.3                     | 4.3 *    |
|                              | II           | 522        | 70 (64-76) | 21.3                    | 19.5     | 22         | 73 (69-77)       | 5.2                     | 5.2 *  | Regional     | 679      | 70 (62-76)       | 27.6   | 26.1                    | 103      | 70 (62-76)       | 23.5                    | 23.5 *   |
|                              | III          | 452        | 69 (61-77) | 18.4                    | 19.0     | 105        | 68 (59-74)       | 24.8                    | 24.8 * | Distant      | 1,247    | 67 (60-75)       | 50.6   | 51.0                    | 316      | 67 (60-74)       | 72.1                    | 72.1 *   |
| IV                           | 1,108        | 67 (60-75) | 45.2       | 46.1                    | 284      | 67 (60-74) | 67.0             | 67.0 *                  |        |              |          |                  |        |                         |          |                  |                         |          |
| Canada, New Brunswick        | All patients | 2,389      | 69 (62-76) |                         |          | 439        | 68 (60-74)       |                         |        | All patients | 2,389    | 69 (62-76)       |        |                         | 439      | 68 (60-74)       |                         |          |
|                              | Missing      | 26         | 72 (67-79) | 1.1                     |          | 5          | 59 (52-71)       | 1.1                     |        | Missing      | 4        | 75 (72-84)       | 0.2    |                         | 2        | 56 (52-59)       | 0.5                     |          |
|                              | I            | 672        | 70 (63-77) | 28.4                    | 27.9     | 12         | 71 (66-74)       | 2.8                     | 2.8 *  | Localised    | 496      | 70 (64-77)       | 20.8   | 21.2                    | 9        | 70 (68-75)       | 2.1                     | 2.1 *    |
|                              | II           | 252        | 70 (64-75) | 10.7                    | 10.7     | 27         | 66 (59-71)       | 6.2                     | 6.2 *  | Regional     | 944      | 69 (62-76)       | 39.6   | 38.5                    | 142      | 67 (60-73)       | 32.5                    | 32.5 *   |
|                              | III          | 494        | 68 (61-76) | 20.9                    | 20.8     | 109        | 67 (60-74)       | 25.1                    | 25.1 * | Distant      | 945      | 68 (61-75)       | 39.6   | 40.4                    | 286      | 68 (61-74)       | 65.4                    | 65.4 *   |
| IV                           | 945          | 68 (61-75) | 40.0       | 40.6                    | 286      | 68 (61-74) | 65.9             | 65.9 *                  |        |              |          |                  |        |                         |          |                  |                         |          |
| Canada, Newfoundland         | All patients | 1,420      | 68 (62-74) |                         |          | 271        | 67 (60-73)       |                         |        | All patients | 1,420    | 68 (62-74)       |        |                         | 271      | 67 (60-73)       |                         |          |
|                              | Missing      | 22         | 70 (64-79) | 1.5                     |          | 14         | 69 (58-73)       | 5.2                     |        | Missing      | 7        | 77 (68-83)       | 0.5    |                         | 1        | 68 (68-68)       | 0.4                     |          |
|                              | I            | 248        | 70 (64-76) | 17.7                    | 18.0     | 10         | 77 (69-81)       | 3.9                     | 3.9 *  | Localised    | 302      | 70 (64-76)       | 21.4   | 23.5                    | 13       | 76 (68-79)       | 4.8                     | 4.8 *    |
|                              | II           | 218        | 69 (63-75) | 15.6                    | 15.9     | 8          | 68 (55-71)       | 3.1                     | 3.1 *  | Regional     | 457      | 68 (62-74)       | 32.3   | 28.9                    | 68       | 68 (58-72)       | 25.2                    | 25.2 *   |
|                              | III          | 324        | 67 (61-73) | 23.2                    | 22.1     | 59         | 69 (60-74)       | 23.0                    | 23.0 * | Distant      | 654      | 67 (60-74)       | 46.3   | 47.6                    | 189      | 67 (60-72)       | 70.0                    | 70.0 *   |
| IV                           | 608          | 67 (60-74) | 43.5       | 44.0                    | 180      | 67 (60-72) | 70.0             | 70.0 *                  |        |              |          |                  |        |                         |          |                  |                         |          |
| Canada, Nova Scotia          | All patients | 2,890      | 69 (62-76) |                         |          | 507        | 68 (61-75)       |                         |        | All patients | 2,890    | 69 (62-76)       |        |                         | 507      | 68 (61-75)       |                         |          |
|                              | Missing      | 26         | 76 (68-86) | 0.9                     |          | 1          | 73 (73-73)       | 0.2                     |        | Missing      | 12       | 75 (69-87)       | 0.4    |                         | 1        | 73 (73-73)       | 0.2                     |          |
|                              | I            | 740        | 70 (63-76) | 25.8                    | 26.8     | 9          | 73 (65-78)       | 1.8                     | 1.8 *  | Localised    | 636      | 70 (63-76)       | 22.1   | 23.3                    | 8        | 71 (63-77)       | 1.6                     | 1.6 *    |
|                              | II           | 273        | 71 (64-76) | 9.5                     | 9.5      | 12         | 67 (64-72)       | 2.4                     | 2.4 *  | Regional     | 929      | 70 (63-76)       | 32.3   | 31.8                    | 109      | 68 (61-76)       | 21.5                    | 21.5 *   |
|                              | III          | 538        | 69 (63-76) | 18.8                    | 18.6     | 96         | 68 (61-76)       | 19.0                    | 19.0 * | Distant      | 1,313    | 68 (61-75)       | 45.6   | 44.9                    | 389      | 68 (61-75)       | 76.9                    | 76.9 *   |
| IV                           | 1,313        | 68 (61-75) | 45.8       | 45.2                    | 389      | 68 (61-75) | 76.9             | 76.9 *                  |        |              |          |                  |        |                         |          |                  |                         |          |
| Canada, Ontario              | All patients | 30,975     | 70 (62-77) |                         |          | 4,739      | 69 (61-75)       |                         |        | All patients | 30,975   | 70 (62-77)       |        |                         | 4,739    | 69 (61-75)       |                         |          |
|                              | Missing      | 3,030      | 70 (62-78) | 9.8                     |          | 292        | 69 (62-76)       | 6.2                     |        | Missing      | 2,856    | 70 (62-78)       | 9.2    |                         | 279      | 69 (62-75)       | 5.9                     |          |
|                              | I            | 6,130      | 71 (64-77) | 21.9                    | 23.0     | 144        | 73 (64-79)       | 3.2                     | 3.5    | Localised    | 4,831    | 71 (64-77)       | 17.2   | 18.3                    | 121      | 73 (65-79)       | 2.7                     | 2.9      |
|                              | II           | 2,718      | 70 (63-77) | 9.7                     | 9.9      | 133        | 70 (64-76)       | 3.0                     | 3.4    | Regional     | 9,886    | 70 (63-77)       | 35.2   | 35.6                    | 1,250    | 68 (61-75)       | 28.0                    | 29.9     |
|                              | III          | 5,695      | 69 (62-76) | 20.4                    | 20.7     | 1,081      | 68 (61-74)       | 24.3                    | 25.7   | Distant      | 13,402   | 69 (61-77)       | 47.7   | 46.1                    | 2,027    | 68 (61-76)       | 69.3                    | 67.2     |
| IV                           | 13,402       | 69 (61-77) | 48.0       | 46.5                    | 3,089    | 68 (61-76) | 69.5             | 67.4                    |        |              |          |                  |        |                         |          |                  |                         |          |
| Canada, Prince Edward Island | All patients | 400        | 68 (62-75) |                         |          | 81         | 70 (64-76)       |                         |        | All patients | 400      | 68 (62-75)       |        |                         | 81       | 70 (64-76)       |                         |          |
|                              | Missing      | 6          | 77 (70-83) | 1.5                     |          | 1          | 70 (70-70)       | 1.2                     |        | Missing      | 4        | 77 (57-80)       | 1.0    |                         | 1        | 70 (70-70)       | 1.2                     |          |
|                              | I            | 74         | 71 (62-76) | 18.8                    | 19.6     | 3          | 77 (73-77)       | 3.8                     | 3.8 *  | Localised    | 64       | 72 (62-77)       | 16.2   | 17.5                    | 2        | 75 (73-77)       | 2.5                     | 2.5 *    |
|                              | II           | 36         | 65 (61-75) | 9.1                     | 8.6      | 6          | 76 (60-78)       | 7.5                     | 7.5 *  | Regional     | 142      | 69 (63-74)       | 35.9   | 34.2                    | 16       | 67 (63-77)       | 20.0                    | 20.0 *   |
|                              | III          | 94         | 70 (64-74) | 23.9                    | 22.9     | 9          | 67 (63-68)       | 11.3                    | 11.3 * | Distant      | 190      | 67 (61-75)       | 48.0   | 48.3                    | 62       | 71 (64-75)       | 77.5                    | 77.5 *   |
| IV                           | 190          | 67 (61-75) | 48.2       | 48.9                    | 62       | 71 (64-75) | 77.5             | 77.5 *                  |        |              |          |                  |        |                         |          |                  |                         |          |
| Canada, Saskatchewan         | All patients | 2,352      | 71 (64-77) |                         |          | 488        | 68 (61-74)       |                         |        | All patients | 2,352    | 71 (64-77)       |        |                         | 488      | 68 (61-74)       |                         |          |
|                              | Missing      | 17         | 74 (71-81) | 0.7                     |          | 6          | 71 (58-79)       | 1.2                     |        | Missing      | 6        | 76 (69-82)       | 0.3    |                         | 1        | 58 (58-58)       | 0.2                     |          |
|                              | I            | 458        | 70 (64-76) | 19.6                    | 18.8     | 6          | 72 (65-76)       | 1.2                     | 1.2 *  | Localised    | 336      | 69 (64-76)       | 14.3   | 14.3                    | 7        | 73 (66-75)       | 1.4                     | 1.4 *    |
|                              | II           | 187        | 73 (68-78) | 8.0                     | 8.1      | 11         | 71 (65-81)       | 2.3                     | 2.3 *  | Regional     | 768      | 71 (64-77)       | 32.7   | 32.8                    | 120      | 70 (60-77)       | 24.6                    | 24.6 *   |
|                              | III          | 449        | 71 (63-76) | 19.2                    | 19.9     | 105        | 69 (60-77)       | 21.8                    | 21.8 * | Distant      | 1,242    | 70 (63-77)       | 52.9   | 52.9                    | 360      | 67 (61-73)       | 73.9                    | 73.9 *   |
| IV                           | 1,241        | 70 (63-77) | 53.1       | 53.2                    | 360      | 67 (61-73) | 74.7             | 74.7 *                  |        |              |          |                  |        |                         |          |                  |                         |          |
| UK, England                  | All patients | 102,433    | 71 (64-78) |                         |          | 18,904     | 69 (63-76)       |                         |        | All patients | 102,433  | 71 (64-78)       |        |                         | 18,904   | 69 (63-76)       |                         |          |
|                              | Missing      | 39,619     | 71 (64-78) | 38.7                    |          | 7,406      | 69 (62-76)       | 39.2                    |        | Missing      | 30,740   | 72 (64-79)       | 30.0   |                         | 6,603    | 69 (62-76)       | 34.9                    |          |
|                              | I            | 10,287     | 72 (65-78) | 16.4                    | 16.7     | 305        | 71 (64-78)       | 2.7                     | 2.7    | Localised    | 15,022   | 71 (65-77)       | 21.0   | 19.0                    | 401      | 71 (64-77)       | 3.3                     | 3.1      |
|                              | II           | 6,141      | 72 (65-78) | 9.8                     | 9.6      | 369        | 70 (64-76)       | 3.2                     | 3.2    | Regional     | 18,089   | 71 (64-77)       | 25.2   | 24.3                    | 2,027    | 69 (63-76)       | 16.5                    | 16.2     |
|                              | III          | 14,130     | 71 (64-77) | 22.5                    | 22.2     | 2,790      | 69 (62-75)       | 24.3                    | 24.2   | Distant      | 38,582   | 70 (63-77)       | 53.8   | 56.7                    | 9,873    | 69 (62-76)       | 80.3                    | 80.7     |
| IV                           | 32,256       | 70 (63-77) | 51.4       | 51.5                    | 8,034    | 69 (63-76) | 69.9             | 69.9                    |        |              |          |                  |        |                         |          |                  |                         |          |
| UK, Northern Ireland         | All patients | 3,085      | 69 (62-76) |                         |          | 711        | 68 (61-74)       |                         |        | All patients | 3,085    | 69 (62-76)       |        |                         | 711      | 68 (61-74)       |                         |          |
|                              | Missing      | 135        | 73 (65-81) | 4.4                     |          | 116        | 69 (63-77)       | 16.3                    |        | Missing      | 103      | 73 (65-80)       | 3.3    |                         | 107      | 69 (64-77)       | 15.0                    |          |
|                              | I            | 424        | 71 (64-76) | 14.4                    | 15.7     | 16         | 68 (63-75)       | 2.7                     | 3.4    | Localised    | 434      | 71 (64-76)       | 14.6   | 15.7                    | 17       | 68 (60-75)       | 2.8                     | 3.5      |
|                              | II           | 320        | 70 (63-77) | 10.8                    | 10.6     | 25         | 69 (63-77)       | 4.2                     | 4.4    | Regional     | 1,135    | 69 (63-76)       | 38.1   | 37.8                    | 188      | 68 (60-74)       | 31.1                    | 32.7     |
|                              | III          | 799        | 69 (62-76) | 27.1                    | 26.8     | 156        | 66 (60-74)       | 26.2                    | 27.8   | Distant      | 1,413    | 68 (61-75)       | 47.4   | 46.6                    | 399      | 67 (61-73)       | 66.1                    | 63.9     |
| IV                           | 1,407        | 68 (61-75) | 47.7       | 46.9                    | 398      | 67 (61-73) | 66.9             | 64.3                    |        |              |          |                  |        |                         |          |                  |                         |          |
| UK, Scotland                 | All patients | 13,466     | 70 (63-76) |                         |          | 3,182      | 69 (62-75)       |                         |        | All patients | 13,466   | 70 (63-76)       |        |                         |          |                  |                         |          |

**Supplementary Table 7.** Age-standardised<sup>o</sup> one- and three-year net survival (%) by stage at diagnosis (without imputation, presenting results of those with missing stage information) and jurisdiction for non-small cell lung carcinoma patients diagnosed during 2010-2014, both sexes combined

| Stage                                 | Canada, Alberta    | Canada, British Columbia | Canada, Manitoba   | Canada, New Brunswick | Canada, Newfoundland and Labrador | Canada, Nova Scotia | Canada, Ontario    | Canada, Prince Edward Island | Canada, Saskatchewan | UK, England        | UK, Northern Ireland | UK, Scotland       | UK, Wales          |
|---------------------------------------|--------------------|--------------------------|--------------------|-----------------------|-----------------------------------|---------------------|--------------------|------------------------------|----------------------|--------------------|----------------------|--------------------|--------------------|
| All patients                          | 52.2 (50.7 - 53.7) | 51.6 (50.2 - 53.0)       | 53.3 (50.5 - 56.0) | 58.5 (55.9 - 61.0)    | 53.1 (48.7 - 57.4)                | 52.4 (49.8 - 54.8)  | 53.1 (52.2 - 53.9) | 47.5 (39.7 - 54.9)           | 52.8 (50.1 - 55.5)   | 44.2 (43.8 - 44.6) | 42.2 (39.7 - 44.7)   | 45.3 (44.0 - 46.5) | 42.2 (40.2 - 44.1) |
| <b>TNM Stage</b>                      |                    |                          |                    |                       |                                   |                     |                    |                              |                      |                    |                      |                    |                    |
| Stage I                               | 93.7 (91.7 - 95.2) | 93.6 (92.0 - 94.8)       | 97.8 (93.8 - 99.2) | 92.9 (89.9 - 95.0)    | 89.9 (83.4 - 93.9)                | 93.9 (91.0 - 95.9)  | 93.0 (92.0 - 93.9) | 90.2 (77.6 - 95.9)           | 90.4 (85.9 - 93.6)   | 90.8 (90.0 - 91.5) | 84.1 (78.7 - 88.2)   | 95.0 (92.8 - 96.6) | 88.1 (85.1 - 90.6) |
| Stage II                              | 82.4 (78.4 - 85.8) | 80.6 (76.5 - 84.1)       | 87.8 (83.6 - 91.0) | 86.1 (79.9 - 90.6)    | 79.5 (67.0 - 87.8)                | 79.3 (72.5 - 84.7)  | 81.1 (78.0 - 83.8) | 85.4 (61.4 - 95.0)           | 81.2 (73.0 - 87.1)   | 76.5 (75.0 - 78.0) | 78.6 (72.6 - 83.5)   | 85.5 (83.6 - 87.3) | 75.2 (70.5 - 79.2) |
| Stage III                             | 59.6 (56.1 - 62.8) | 57.6 (54.0 - 61.1)       | 63.4 (57.9 - 68.4) | 62.0 (56.6 - 66.9)    | 60.9 (50.5 - 69.8)                | 61.6 (56.2 - 66.6)  | 58.6 (56.6 - 60.6) | 54.3 (38.9 - 67.3)           | 67.6 (62.0 - 72.6)   | 51.7 (50.7 - 52.8) | 48.5 (43.6 - 53.3)   | 58.4 (55.7 - 60.9) | 50.9 (46.5 - 55.1) |
| Stage IV                              | 24.7 (23.0 - 26.5) | 29.2 (27.5 - 31.0)       | 21.9 (18.8 - 25.1) | 21.6 (18.5 - 24.8)    | 27.4 (22.4 - 32.6)                | 21.6 (18.9 - 24.4)  | 27.5 (26.4 - 28.6) | 18.2 (11.8 - 25.7)           | 28.5 (25.4 - 31.7)   | 22.7 (22.2 - 23.2) | 18.4 (15.8 - 21.2)   | 18.5 (17.2 - 19.8) | 20.0 (17.8 - 22.2) |
| Missing                               | 44.1 (20.8 - 65.2) | 54.3 (47.3 - 60.8)       | *                  | *                     | *                                 | *                   | 50.8 (48.3 - 53.2) | *                            | *                    | 41.1 (40.1 - 42.0) | 43.1 (30.6 - 55.0)   | 39.3 (34.1 - 44.5) | 37.5 (29.3 - 45.7) |
| <b>Mapped SEER stage</b>              |                    |                          |                    |                       |                                   |                     |                    |                              |                      |                    |                      |                    |                    |
| Localised                             | 93.8 (91.4 - 95.6) | 93.7 (91.7 - 95.2)       | 96.4 (93.4 - 98.1) | 93.1 (89.7 - 95.4)    | 89.8 (84.0 - 93.6)                | 94.1 (90.9 - 96.2)  | 92.4 (91.0 - 93.6) | 89.0 (75.7 - 95.2)           | 89.3 (82.5 - 93.6)   | 90.3 (89.6 - 90.9) | 84.1 (78.7 - 88.2)   | 91.7 (90.2 - 93.0) | 88.1 (85.1 - 90.6) |
| Regional                              | 71.9 (69.5 - 74.1) | 69.9 (67.6 - 72.1)       | 74.8 (70.5 - 78.5) | 76.0 (72.6 - 79.1)    | 66.7 (58.3 - 73.8)                | 70.9 (67.2 - 74.3)  | 69.0 (67.4 - 70.5) | 64.0 (52.0 - 73.7)           | 74.4 (70.4 - 78.0)   | 62.8 (61.8 - 63.8) | 56.8 (52.6 - 60.8)   | 65.5 (63.2 - 67.7) | 57.7 (54.3 - 60.9) |
| Distant                               | 24.8 (23.1 - 26.5) | 29.3 (27.6 - 31.0)       | 24.7 (21.7 - 27.9) | 25.5 (22.2 - 28.9)    | 29.4 (24.4 - 34.7)                | 21.6 (18.9 - 24.4)  | 27.5 (26.4 - 28.6) | 19.4 (10.7 - 29.9)           | 31.1 (27.9 - 34.4)   | 24.4 (23.9 - 24.9) | 18.5 (15.9 - 21.2)   | 20.6 (19.3 - 21.9) | 20.0 (17.8 - 22.2) |
| Missing                               | *                  | 42.7 (32.9 - 52.2)       | *                  | *                     | *                                 | *                   | 50.6 (48.1 - 53.1) | *                            | *                    | 33.1 (32.0 - 34.2) | 44.0 (29.2 - 57.8)   | 25.9 (21.3 - 30.7) | 37.5 (29.3 - 45.7) |
| <b>1-year NS (95% CI)<sup>†</sup></b> |                    |                          |                    |                       |                                   |                     |                    |                              |                      |                    |                      |                    |                    |
| All patients                          | 30.6 (29.1 - 32.1) | 29.3 (27.9 - 30.7)       | 34.7 (32.0 - 37.3) | 37.7 (34.8 - 40.6)    | 29.1 (25.0 - 33.4)                | 32.1 (29.8 - 34.4)  | 30.9 (30.1 - 31.8) | 20.9 (14.5 - 28.2)           | 30.5 (27.8 - 33.2)   | 22.3 (21.9 - 22.6) | 20.7 (18.7 - 22.7)   | 22.8 (21.8 - 23.8) | 20.5 (18.9 - 22.2) |
| <b>TNM Stage</b>                      |                    |                          |                    |                       |                                   |                     |                    |                              |                      |                    |                      |                    |                    |
| Stage I                               | 75.8 (72.6 - 78.6) | 77.9 (75.3 - 80.3)       | 83.9 (77.3 - 88.6) | 76.7 (72.0 - 80.7)    | 76.5 (66.0 - 84.1)                | 74.3 (69.9 - 78.2)  | 79.6 (77.9 - 81.2) | 71.7 (55.3 - 82.9)           | 79.4 (73.8 - 84.0)   | 71.5 (69.9 - 73.0) | 63.9 (57.5 - 69.6)   | 78.7 (75.0 - 81.8) | 68.7 (64.3 - 72.6) |
| Stage II                              | 57.7 (52.5 - 62.5) | 57.0 (51.9 - 61.8)       | 69.4 (64.0 - 74.2) | 56.4 (48.2 - 63.8)    | 57.6 (44.5 - 68.7)                | 55.7 (47.9 - 62.7)  | 57.1 (54.0 - 60.2) | 31.0 (13.1 - 50.9)           | 55.7 (44.8 - 65.3)   | 50.8 (48.8 - 52.7) | 50.0 (42.8 - 56.7)   | 57.7 (54.6 - 60.6) | 44.8 (38.3 - 51.0) |
| Stage III                             | 26.2 (23.2 - 29.2) | 26.7 (23.5 - 29.9)       | 28.6 (20.8 - 37.0) | 32.1 (27.0 - 37.3)    | 26.6 (19.1 - 34.8)                | 29.7 (24.2 - 35.4)  | 26.7 (24.7 - 28.8) | 16.8 (7.8 - 28.7)            | 31.3 (25.9 - 36.7)   | 19.9 (18.9 - 21.0) | 18.4 (14.6 - 22.5)   | 23.8 (21.2 - 26.5) | 19.8 (16.3 - 23.4) |
| Stage IV                              | 7.7 (6.7 - 8.8)    | 9.4 (8.1 - 10.7)         | 6.1 (4.5 - 8.1)    | 6.6 (4.8 - 8.8)       | 4.5 (1.4 - 10.6)                  | 7.2 (5.6 - 9.0)     | 7.8 (7.0 - 8.6)    | 5.2 (2.3 - 9.8)              | 7.8 (6.0 - 9.8)      | 5.4 (5.1 - 5.8)    | 3.3 (2.2 - 4.7)      | 3.5 (2.9 - 4.2)    | 5.0 (3.7 - 6.4)    |
| Missing                               | 28.9 (12.6 - 47.5) | 39.8 (33.9 - 45.7)       | *                  | *                     | *                                 | *                   | 29.5 (27.4 - 31.6) | *                            | *                    | 20.2 (19.6 - 20.9) | 30.7 (20.5 - 41.5)   | 14.4 (11.0 - 18.2) | 19.4 (14.0 - 25.4) |
| <b>Mapped SEER stage</b>              |                    |                          |                    |                       |                                   |                     |                    |                              |                      |                    |                      |                    |                    |
| Localised                             | 76.5 (72.7 - 79.8) | 79.1 (75.9 - 81.9)       | 83.0 (77.4 - 87.3) | 75.7 (70.2 - 80.4)    | 77.1 (67.7 - 84.1)                | 74.4 (69.6 - 78.6)  | 78.9 (76.9 - 80.8) | 74.3 (53.5 - 86.9)           | 79.1 (71.7 - 84.7)   | 73.4 (72.3 - 74.5) | 63.7 (57.4 - 69.3)   | 70.7 (68.0 - 73.3) | 68.7 (64.3 - 72.6) |
| Regional                              | 43.2 (40.6 - 45.7) | 42.7 (40.1 - 45.2)       | 46.3 (37.7 - 54.5) | 48.8 (43.8 - 53.5)    | 36.3 (29.2 - 43.5)                | 41.7 (36.5 - 46.7)  | 41.1 (39.3 - 42.9) | 23.8 (15.0 - 33.7)           | 46.7 (42.3 - 51.0)   | 33.1 (32.1 - 34.2) | 26.7 (22.9 - 30.6)   | 31.7 (29.2 - 34.3) | 26.3 (23.1 - 29.5) |
| Distant                               | 7.7 (6.7 - 8.9)    | 9.4 (8.1 - 10.7)         | 7.8 (6.0 - 9.8)    | 8.6 (6.1 - 11.7)      | 5.2 (1.7 - 11.8)                  | 7.2 (5.6 - 9.0)     | 7.8 (7.0 - 8.6)    | 4.3 (0.7 - 13.2)             | 9.0 (6.6 - 11.8)     | 6.0 (5.6 - 6.3)    | 3.4 (2.3 - 4.8)      | 4.1 (3.5 - 4.8)    | 5.0 (3.7 - 6.4)    |
| Missing                               | *                  | 31.1 (23.3 - 39.1)       | *                  | *                     | *                                 | *                   | 29.3 (27.2 - 31.4) | *                            | *                    | 12.1 (11.5 - 12.6) | 33.4 (20.9 - 46.3)   | 9.0 (6.8 - 11.5)   | 19.4 (14.0 - 25.4) |

<sup>†</sup>NS = Net Survival; CI = Confidence Interval

\* <30 patients

<sup>o</sup> Standard population used for age-standardisation is International Cancer Survival Standard (ICSS-1) derived in Corazzari et al. (2004)

**Supplementary Table 8.** Age-standardised\* one- and three-year net survival (%) by (imputed) stage at diagnosis and jurisdiction for non-small cell lung carcinoma patients diagnosed during 2010-2014, both sexes combined

| Stage                    | Canada, Alberta    | Canada, British Columbia | Canada, Manitoba    | Canada, New Brunswick | Canada, Newfoundland and Labrador | Canada, Nova Scotia | Canada, Ontario    | Canada, Prince Edward Island | Canada, Saskatchewan | UK, England        | UK, Northern Ireland | UK, Scotland       | UK, Wales          |
|--------------------------|--------------------|--------------------------|---------------------|-----------------------|-----------------------------------|---------------------|--------------------|------------------------------|----------------------|--------------------|----------------------|--------------------|--------------------|
| All patients             | 52.2 (50.7 - 53.7) | 51.6 (50.2 - 53.0)       | 53.3 (50.5 - 56.0)  | 58.5 (55.9 - 61.0)    | 53.1 (48.7 - 57.4)                | 52.4 (49.8 - 54.8)  | 53.1 (52.2 - 53.9) | 47.5 (39.7 - 54.9)           | 52.8 (50.1 - 55.5)   | 44.2 (43.8 - 44.6) | 42.2 (39.7 - 44.7)   | 45.3 (44.0 - 46.5) | 42.2 (40.2 - 44.1) |
| <b>TNM Stage</b>         |                    |                          |                     |                       |                                   |                     |                    |                              |                      |                    |                      |                    |                    |
| Stage I                  | 94.2 (92.6 - 95.8) | 93.6 (92.2 - 95.0)       | 97.7 (95.4 - 100.0) | 92.8 (90.2 - 95.3)    | 89.9 (84.9 - 95.0)                | 93.9 (91.4 - 96.3)  | 92.8 (91.9 - 93.8) | 89.9 (81.4 - 98.4)           | 90.4 (86.7 - 94.2)   | 90.7 (90.0 - 91.5) | 84.2 (79.6 - 88.8)   | 94.8 (92.9 - 96.7) | 87.9 (85.2 - 90.7) |
| Stage II                 | 83.2 (79.6 - 86.9) | 80.9 (77.2 - 84.6)       | 87.7 (84.0 - 91.4)  | 86.1 (80.8 - 91.4)    | 79.4 (69.2 - 89.6)                | 79.3 (73.2 - 85.4)  | 80.8 (77.8 - 83.7) | 85.3 (70.1 - 100.0)          | 81.1 (74.2 - 88.1)   | 76.7 (75.3 - 78.0) | 79.2 (73.9 - 84.5)   | 85.1 (83.3 - 86.9) | 75.1 (70.8 - 79.3) |
| Stage III                | 61.8 (58.6 - 65.1) | 58.0 (54.6 - 61.4)       | 63.1 (57.8 - 68.3)  | 62.0 (56.8 - 67.1)    | 60.9 (51.2 - 70.6)                | 61.6 (56.4 - 66.8)  | 58.6 (56.6 - 60.6) | 55.6 (41.4 - 69.8)           | 67.6 (62.3 - 72.9)   | 52.0 (51.0 - 53.1) | 48.8 (43.9 - 53.7)   | 58.1 (55.5 - 60.7) | 50.5 (46.2 - 54.9) |
| Stage IV                 | 26.8 (25.0 - 28.6) | 29.2 (27.5 - 30.9)       | 21.7 (18.6 - 24.9)  | 21.6 (18.5 - 24.7)    | 27.4 (22.3 - 32.5)                | 21.5 (18.8 - 24.3)  | 27.5 (26.4 - 28.6) | 18.9 (11.9 - 25.9)           | 28.5 (25.4 - 31.7)   | 22.1 (21.6 - 22.6) | 18.4 (15.7 - 21.0)   | 18.2 (16.9 - 19.5) | 19.8 (17.7 - 21.9) |
| <b>Mapped SEER stage</b> |                    |                          |                     |                       |                                   |                     |                    |                              |                      |                    |                      |                    |                    |
| Localised                | 94.4 (92.6 - 96.2) | 93.6 (91.9 - 95.4)       | 96.4 (94.2 - 98.6)  | 93.1 (90.4 - 95.9)    | 89.8 (85.2 - 94.5)                | 94.0 (91.5 - 96.6)  | 92.2 (91.0 - 93.4) | 89.0 (80.0 - 98.0)           | 89.4 (84.0 - 94.7)   | 89.1 (88.4 - 89.9) | 84.1 (79.4 - 88.8)   | 91.4 (89.9 - 92.8) | 88.2 (85.5 - 90.9) |
| Regional                 | 73.5 (71.3 - 75.6) | 69.8 (67.5 - 72.0)       | 74.8 (70.8 - 78.8)  | 76.0 (72.8 - 79.3)    | 66.7 (58.9 - 74.4)                | 70.9 (67.3 - 74.4)  | 69.0 (67.6 - 70.5) | 64.9 (54.4 - 75.3)           | 74.5 (70.6 - 78.3)   | 61.7 (60.7 - 62.6) | 57.0 (52.9 - 61.1)   | 65.0 (62.8 - 67.2) | 57.4 (54.0 - 60.7) |
| Distant                  | 26.8 (24.9 - 28.6) | 29.0 (27.3 - 30.7)       | 24.7 (21.6 - 27.8)  | 25.5 (22.1 - 28.8)    | 29.6 (24.5 - 34.8)                | 21.6 (18.8 - 24.3)  | 27.4 (26.4 - 28.5) | 19.4 (9.6 - 29.3)            | 31.0 (27.8 - 34.3)   | 23.3 (22.8 - 23.8) | 18.4 (15.7 - 21.1)   | 20.1 (18.8 - 21.4) | 19.7 (17.6 - 21.9) |
| All patients             | 30.6 (29.1 - 32.1) | 29.3 (27.9 - 30.7)       | 34.7 (32.0 - 37.3)  | 37.7 (34.8 - 40.6)    | 29.1 (25.0 - 33.4)                | 32.1 (29.8 - 34.4)  | 30.9 (30.1 - 31.8) | 20.9 (14.5 - 28.2)           | 30.5 (27.8 - 33.2)   | 22.3 (21.9 - 22.6) | 20.7 (18.7 - 22.7)   | 22.8 (21.8 - 23.8) | 20.5 (18.9 - 22.2) |
| <b>TNM Stage</b>         |                    |                          |                     |                       |                                   |                     |                    |                              |                      |                    |                      |                    |                    |
| Stage I                  | 76.4 (72.0 - 80.9) | 78.5 (76.1 - 80.9)       | 83.9 (78.3 - 89.4)  | 76.0 (71.7 - 80.4)    | 75.9 (66.8 - 85.0)                | 74.3 (70.2 - 78.5)  | 79.8 (78.3 - 81.4) | 71.2 (57.5 - 85.0)           | 79.2 (74.1 - 84.3)   | 72.8 (71.5 - 74.0) | 64.6 (58.7 - 70.5)   | 77.8 (74.3 - 81.2) | 68.7 (64.6 - 72.7) |
| Stage II                 | 57.1 (50.7 - 63.5) | 57.7 (53.0 - 62.3)       | 69.4 (64.3 - 74.6)  | 55.5 (47.7 - 63.3)    | 57.2 (45.1 - 69.4)                | 55.6 (48.1 - 63.0)  | 56.9 (53.1 - 60.7) | 31.8 (11.8 - 51.7)           | 55.4 (45.1 - 65.7)   | 50.5 (48.5 - 52.5) | 51.6 (44.7 - 58.6)   | 56.5 (53.5 - 59.4) | 44.6 (38.3 - 51.0) |
| Stage III                | 28.7 (25.7 - 31.8) | 27.3 (24.1 - 30.4)       | 28.5 (20.3 - 36.7)  | 31.3 (26.3 - 36.4)    | 25.9 (18.2 - 33.7)                | 29.8 (24.1 - 35.4)  | 27.0 (25.1 - 28.9) | 17.1 (6.4 - 27.8)            | 31.1 (25.7 - 36.6)   | 19.7 (18.7 - 20.7) | 18.9 (14.9 - 22.9)   | 22.8 (20.3 - 25.3) | 19.7 (16.2 - 23.2) |
| Stage IV                 | 8.7 (7.4 - 9.9)    | 9.6 (8.3 - 10.9)         | 6.1 (4.3 - 7.9)     | 6.6 (4.6 - 8.5)       | 4.4 (0.0 - 8.7)                   | 7.1 (5.4 - 8.9)     | 7.3 (6.6 - 8.1)    | 5.3 (1.6 - 8.9)              | 7.7 (5.8 - 9.6)      | 5.0 (4.7 - 5.3)    | 3.4 (2.1 - 4.6)      | 3.2 (2.7 - 3.8)    | 4.9 (3.6 - 6.2)    |
| <b>Mapped SEER stage</b> |                    |                          |                     |                       |                                   |                     |                    |                              |                      |                    |                      |                    |                    |
| Localised                | 80.4 (77.3 - 83.5) | 79.1 (76.2 - 82.0)       | 83.0 (78.1 - 87.8)  | 75.4 (70.4 - 80.4)    | 77.0 (68.9 - 85.1)                | 74.4 (69.9 - 78.9)  | 79.0 (77.1 - 80.9) | 74.2 (57.7 - 90.6)           | 79.1 (72.7 - 85.6)   | 69.6 (68.4 - 70.8) | 64.6 (58.7 - 70.5)   | 69.8 (67.2 - 72.4) | 69.1 (65.0 - 73.1) |
| Regional                 | 44.6 (41.9 - 47.4) | 42.9 (40.4 - 45.4)       | 46.3 (37.8 - 54.8)  | 48.7 (43.9 - 53.6)    | 36.1 (28.9 - 43.2)                | 41.6 (36.5 - 46.7)  | 41.4 (39.7 - 43.0) | 23.7 (14.6 - 32.8)           | 46.7 (42.4 - 51.1)   | 29.1 (28.2 - 29.9) | 27.4 (23.6 - 31.3)   | 30.8 (28.3 - 33.2) | 26.2 (23.0 - 29.3) |
| Distant                  | 8.7 (7.5 - 10.0)   | 9.4 (8.2 - 10.7)         | 7.8 (5.9 - 9.7)     | 8.8 (6.0 - 11.7)      | 5.1 (0.3 - 9.9)                   | 7.2 (5.4 - 8.9)     | 7.4 (6.7 - 8.1)    | 4.4 (0.0 - 10.4)             | 9.0 (6.4 - 11.5)     | 4.8 (4.5 - 5.0)    | 3.4 (2.2 - 4.7)      | 3.9 (3.3 - 4.5)    | 4.9 (3.6 - 6.2)    |

\*NS = Net Survival; CI = Confidence Interval

\* Standard population used for age-standardisation is International Cancer Survival Standard (ICSS-1) derived in Corazzari et al. (2004)

**Supplementary Table 9.** Age-standardised<sup>o</sup> one- and three-year net survival (%) by stage at diagnosis (without imputation, presenting results of those with missing stage information) and jurisdiction for small cell lung carcinoma patients diagnosed during 2010-2014, both sexes combined

| Stage                    | Canada, Alberta    | Canada, British Columbia | Canada, Manitoba   | Canada, New Brunswick | Canada, Newfoundland and Labrador | Canada, Nova Scotia | Canada, Ontario    | Canada, Prince Edward Island | Canada, Saskatchewan | UK, England        | UK, Northern Ireland | UK, Scotland       | UK, Wales          |
|--------------------------|--------------------|--------------------------|--------------------|-----------------------|-----------------------------------|---------------------|--------------------|------------------------------|----------------------|--------------------|----------------------|--------------------|--------------------|
| All patients             | 34.6 (31.1 - 38.0) | 31.0 (26.6 - 35.5)       | 31.4 (26.3 - 36.6) | 33.8 (28.1 - 39.6)    | 32.6 (25.7 - 39.7)                | 25.2 (20.4 - 30.3)  | 34.4 (32.1 - 36.8) | 31.9 (18.7 - 45.9)           | 34.2 (27.9 - 40.6)   | 28.5 (27.5 - 29.4) | 23.7 (19.7 - 27.9)   | 28.0 (25.8 - 30.3) | 24.8 (21.4 - 28.4) |
| <b>TNM Stage</b>         |                    |                          |                    |                       |                                   |                     |                    |                              |                      |                    |                      |                    |                    |
| Stage I                  | 79.6 (63.7 - 89.1) | 90.7 (68.9 - 97.5)       | *                  | *                     | *                                 | *                   | 82.4 (72.6 - 88.9) | *                            | *                    | 72.2 (57.1 - 82.8) | *                    | 80.3 (54.3 - 92.4) | *                  |
| Stage II                 | 77.3 (59.3 - 88.0) | 77.5 (58.1 - 88.7)       | *                  | *                     | *                                 | *                   | 71.8 (58.6 - 81.4) | *                            | *                    | 69.0 (63.7 - 73.7) | *                    | 67.7 (54.2 - 78.0) | 39.8 (16.2 - 62.8) |
| Stage III                | 58.0 (50.4 - 64.8) | 48.7 (42.5 - 54.6)       | 50.1 (38.3 - 60.8) | 56.0 (42.2 - 67.8)    | 52.9 (33.3 - 69.2)                | 42.1 (29.8 - 53.8)  | 53.5 (47.9 - 58.8) | *                            | 56.2 (43.7 - 66.9)   | 46.9 (44.4 - 49.3) | 37.8 (28.4 - 47.1)   | 48.4 (43.7 - 53.0) | 44.4 (37.9 - 50.7) |
| Stage IV                 | 18.1 (15.0 - 21.3) | 18.4 (15.5 - 21.6)       | 16.0 (11.3 - 21.4) | 19.9 (14.5 - 26.0)    | 19.3 (12.9 - 26.7)                | 16.7 (12.6 - 21.2)  | 22.5 (20.0 - 25.2) | 25.6 (13.3 - 39.8)           | 21.5 (16.4 - 27.2)   | 18.4 (17.4 - 19.5) | 13.7 (9.5 - 18.7)    | 15.9 (14.0 - 18.0) | 13.6 (10.9 - 16.6) |
| Missing                  | *                  | 25.7 (10.2 - 44.6)       | *                  | *                     | *                                 | *                   | 35.2 (26.4 - 44.2) | *                            | *                    | 27.8 (25.7 - 30.0) | 22.3 (13.6 - 32.3)   | 34.3 (27.8 - 41.0) | 30.0 (18.5 - 42.3) |
| <b>Mapped SEER stage</b> |                    |                          |                    |                       |                                   |                     |                    |                              |                      |                    |                      |                    |                    |
| Localised                | 85.6 (64.3 - 94.6) | *                        | *                  | *                     | *                                 | *                   | 80.8 (69.3 - 88.3) | *                            | *                    | 69.7 (59.8 - 77.5) | *                    | 65.9 (52.7 - 76.2) | *                  |
| Regional                 | 60.9 (54.3 - 66.8) | 54.7 (47.7 - 61.3)       | 56.9 (45.4 - 66.8) | 60.5 (47.8 - 71.0)    | 56.8 (36.8 - 72.7)                | 47.1 (35.4 - 58.0)  | 56.4 (51.4 - 61.1) | 63.2 (31.8 - 83.2)           | 58.4 (46.5 - 68.5)   | 53.8 (50.8 - 56.6) | 39.7 (30.9 - 48.3)   | 51.0 (45.7 - 56.1) | 44.0 (36.5 - 51.2) |
| Distant                  | 18.1 (15.0 - 21.3) | 17.1 (11.7 - 23.3)       | 19.2 (14.3 - 24.7) | 19.9 (14.5 - 26.0)    | 20.8 (14.3 - 28.3)                | 16.7 (12.6 - 21.2)  | 22.5 (20.0 - 25.2) | 24.6 (11.6 - 40.1)           | 21.5 (16.4 - 27.2)   | 21.7 (20.7 - 22.8) | 14.0 (9.7 - 19.0)    | 19.4 (17.4 - 21.4) | 13.1 (10.1 - 16.5) |
| Missing                  | *                  | 11.5 (2.0 - 30.5)        | *                  | *                     | *                                 | *                   | 34.0 (25.2 - 43.0) | *                            | *                    | 28.6 (26.3 - 30.9) | 19.6 (11.0 - 30.1)   | 33.9 (25.7 - 42.3) | 29.9 (16.8 - 44.2) |
| All patients             | 11.1 (8.6 - 13.9)  | 10.9 (8.0 - 14.4)        | 10.9 (7.8 - 14.6)  | 13.0 (9.4 - 17.2)     | 11.4 (6.8 - 17.3)                 | 7.7 (5.0 - 11.2)    | 12.2 (10.4 - 14.1) | 10.5 (3.5 - 21.9)            | 9.5 (5.9 - 14.1)     | 7.8 (7.2 - 8.4)    | 6.2 (4.0 - 9.2)      | 7.7 (6.5 - 9.0)    | 7.7 (5.8 - 10.1)   |
| <b>TNM Stage</b>         |                    |                          |                    |                       |                                   |                     |                    |                              |                      |                    |                      |                    |                    |
| Stage I                  | 39.9 (23.1 - 56.3) | 59.3 (37.2 - 75.8)       | *                  | *                     | *                                 | *                   | 62.5 (49.4 - 73.2) | *                            | *                    | 42.0 (32.0 - 51.7) | *                    | 51.5 (24.3 - 73.3) | *                  |
| Stage II                 | 50.8 (30.0 - 68.3) | 37.4 (20.3 - 54.5)       | *                  | *                     | *                                 | *                   | 38.2 (25.4 - 50.8) | *                            | *                    | 34.8 (28.0 - 41.8) | *                    | 30.1 (20.0 - 41.0) | 32.7 (12.6 - 54.7) |
| Stage III                | 20.4 (14.7 - 26.9) | 17.6 (13.1 - 22.6)       | 15.7 (8.9 - 24.4)  | 27.1 (16.5 - 38.8)    | 18.9 (7.2 - 34.9)                 | 15.9 (8.7 - 25.1)   | 20.8 (16.0 - 26.0) | 29.3 (3.4 - 64.0)            | 23.3 (14.0 - 34.0)   | 13.1 (10.9 - 15.4) | 11.0 (5.9 - 18.0)    | 14.1 (10.9 - 17.7) | 11.1 (7.5 - 15.4)  |
| Stage IV                 | 3.5 (2.3 - 5.1)    | 4.2 (2.8 - 6.2)          | 4.5 (2.3 - 7.7)    | 4.1 (1.9 - 7.6)       | 7.4 (3.4 - 13.4)                  | 3.3 (1.7 - 5.9)     | 4.7 (3.6 - 5.9)    | 3.6 (0.2 - 16.2)             | 3.9 (1.8 - 7.1)      | 3.5 (2.9 - 4.1)    | 1.5 (0.4 - 4.2)      | 2.1 (1.4 - 3.0)    | 3.3 (2.0 - 5.1)    |
| Missing                  | *                  | 16.3 (5.6 - 31.9)        | *                  | *                     | *                                 | *                   | 15.8 (10.4 - 22.2) | *                            | *                    | 7.5 (6.6 - 8.5)    | 5.3 (2.0 - 11.3)     | 11.0 (7.6 - 15.1)  | 17.4 (9.1 - 27.9)  |
| <b>Mapped SEER stage</b> |                    |                          |                    |                       |                                   |                     |                    |                              |                      |                    |                      |                    |                    |
| Localised                | 39.7 (20.6 - 58.2) | *                        | *                  | *                     | *                                 | *                   | 56.0 (41.1 - 68.5) | *                            | *                    | 40.8 (33.3 - 48.0) | *                    | 37.1 (24.6 - 49.5) | *                  |
| Regional                 | 25.5 (19.7 - 31.7) | 21.5 (15.3 - 28.3)       | 23.1 (14.2 - 33.3) | 29.7 (20.0 - 40.1)    | 20.4 (6.8 - 39.0)                 | 19.4 (11.8 - 28.5)  | 24.1 (19.6 - 29.0) | 31.6 (6.3 - 61.9)            | 25.0 (16.0 - 35.1)   | 17.1 (14.5 - 19.9) | 13.9 (8.3 - 20.9)    | 17.7 (13.8 - 21.9) | 13.8 (9.3 - 19.2)  |
| Distant                  | 3.5 (2.3 - 5.1)    | 3.9 (2.3 - 6.1)          | 5.4 (3.1 - 8.6)    | 4.1 (1.9 - 7.6)       | 6.1 (2.7 - 11.5)                  | 3.3 (1.7 - 5.9)     | 4.7 (3.6 - 5.9)    | 5.1 (0.6 - 17.4)             | 3.9 (1.8 - 7.1)      | 4.7 (4.0 - 5.4)    | 1.6 (0.4 - 4.3)      | 2.8 (2.0 - 3.8)    | 2.8 (1.5 - 4.8)    |
| Missing                  | *                  | 11.9 (2.0 - 31.4)        | *                  | *                     | *                                 | *                   | 14.3 (9.2 - 20.4)  | *                            | *                    | 7.5 (6.6 - 8.6)    | 5.5 (1.9 - 11.8)     | 11.7 (7.6 - 16.8)  | 18.3 (9.2 - 30.0)  |

<sup>1</sup>NS = Net Survival; CI = Confidence Interval

\* &lt;30 patients

<sup>o</sup> Standard population used for age-standardisation is International Cancer Survival Standard (ICSS-1) derived in Corazzini et al. (2004)

**Supplementary Table 10.** Age-standardised<sup>a</sup> one- and three-year net survival (%) by (imputed) stage at diagnosis and jurisdiction for small cell lung carcinoma patients diagnosed during 2010-2014, both sexes combined

| Stage                    | Canada, Alberta    | Canada, British Columbia | Canada, Manitoba     | Canada, New Brunswick | Canada, Newfoundland and Labrador | Canada, Nova Scotia  | Canada, Ontario    | Canada, Prince Edward Island | Canada, Saskatchewan | UK, England        | UK, Northern Ireland | UK, Scotland       | UK, Wales            |
|--------------------------|--------------------|--------------------------|----------------------|-----------------------|-----------------------------------|----------------------|--------------------|------------------------------|----------------------|--------------------|----------------------|--------------------|----------------------|
| All patients             | 34.6 (31.1 - 38.0) | 31.0 (26.6 - 35.5)       | 31.4 (26.3 - 36.6)   | 33.8 (28.1 - 39.6)    | 32.6 (25.7 - 39.7)                | 25.2 (20.4 - 30.3)   | 34.4 (32.1 - 36.8) | 31.9 (18.7 - 45.9)           | 34.2 (27.9 - 40.6)   | 28.5 (27.5 - 29.4) | 23.7 (19.7 - 27.9)   | 28.0 (25.8 - 30.3) | 24.8 (21.4 - 28.4)   |
| <b>TNM Stage</b>         |                    |                          |                      |                       |                                   |                      |                    |                              |                      |                    |                      |                    |                      |
| Stage I                  | 79.5 (67.1 - 91.8) | 89.6 (76.8 - 100.0)      | *                    | *                     | *                                 | *                    | 83.1 (75.1 - 91.1) | *                            | *                    | 76.9 (71.8 - 81.9) | 64.3 (37.7 - 90.9)   | 81.5 (64.5 - 98.4) | *                    |
| Stage II                 | 77.0 (63.0 - 91.1) | 77.8 (63.0 - 92.6)       | *                    | *                     | *                                 | *                    | 73.2 (63.2 - 83.2) | *                            | *                    | 67.9 (62.5 - 73.4) | 57.5 (33.2 - 81.9)   | 70.3 (59.1 - 81.6) | 39.8 (16.2 - 62.8)** |
| Stage III                | 58.0 (50.8 - 65.2) | 48.9 (42.8 - 55.0)       | 50.1 (38.3 - 60.8)** | 56.0 (42.2 - 67.8)**  | 52.9 (33.3 - 69.2)**              | 42.1 (29.8 - 53.8)** | 54.7 (50.8 - 58.6) | 42.8 (7.0 - 76.3)**°         | 56.2 (43.7 - 66.9)** | 47.8 (45.9 - 49.7) | 36.7 (27.0 - 46.4)   | 49.1 (44.3 - 53.8) | 44.4 (37.9 - 50.7)** |
| Stage IV                 | 18.2 (15.0 - 21.3) | 18.3 (15.2 - 21.3)       | 16.0 (11.3 - 21.4)** | 19.9 (14.5 - 26.0)**  | 19.3 (12.9 - 26.7)**              | 16.7 (12.6 - 21.2)** | 21.8 (19.9 - 23.8) | 25.6 (13.3 - 39.8)**°        | 21.5 (16.4 - 27.2)** | 17.5 (16.6 - 18.3) | 12.7 (8.6 - 16.9)    | 16.4 (14.4 - 18.4) | 13.6 (10.9 - 16.6)** |
| <b>Mapped SEER stage</b> |                    |                          |                      |                       |                                   |                      |                    |                              |                      |                    |                      |                    |                      |
| Localised                | 85.3 (71.3 - 99.3) | *                        | *                    | *                     | *                                 | *                    | 80.9 (71.3 - 90.5) | *                            | *                    | 73.5 (68.6 - 78.4) | 59.7 (33.8 - 85.6)   | 67.9 (56.5 - 79.4) | *                    |
| Regional                 | 60.9 (54.6 - 67.1) | 54.7 (47.7 - 61.3)**     | 56.9 (45.4 - 66.8)** | 60.5 (47.8 - 71.0)**  | 56.8 (36.8 - 72.7)**              | 47.1 (35.4 - 58.0)** | 57.4 (53.8 - 61.0) | 63.2 (31.8 - 83.2)**         | 58.4 (46.5 - 68.5)** | 54.7 (52.4 - 57.1) | 38.2 (30.1 - 46.2)   | 52.0 (46.9 - 57.1) | 44.0 (36.5 - 51.2)** |
| Distant                  | 18.1 (14.9 - 21.3) | 17.1 (11.7 - 23.3)**     | 19.2 (14.3 - 24.7)** | 19.9 (14.5 - 26.0)**  | 20.8 (14.3 - 28.3)**              | 16.7 (12.6 - 21.2)** | 21.7 (19.8 - 23.6) | 24.6 (11.6 - 40.1)**         | 21.5 (16.4 - 27.2)** | 20.9 (20.0 - 21.7) | 13.0 (9.2 - 16.8)    | 19.6 (17.6 - 21.6) | 13.1 (10.1 - 16.5)** |
| All patients             | 11.1 (8.6 - 13.9)  | 10.9 (8.0 - 14.4)        | 10.9 (7.8 - 14.6)    | 13.0 (9.4 - 17.2)     | 11.4 (6.8 - 17.3)                 | 7.7 (5.0 - 11.2)     | 12.2 (10.4 - 14.1) | 10.5 (3.5 - 21.9)            | 9.5 (5.9 - 14.1)     | 7.8 (7.2 - 8.4)    | 6.2 (4.0 - 9.2)      | 7.7 (6.5 - 9.0)    | 7.7 (5.8 - 10.1)     |
| <b>TNM Stage</b>         |                    |                          |                      |                       |                                   |                      |                    |                              |                      |                    |                      |                    |                      |
| Stage I                  | 40.2 (23.1 - 57.3) | 58.3 (38.3 - 78.4)       | *                    | *                     | *                                 | *                    | 60.1 (47.0 - 73.3) | *                            | *                    | 46.3 (40.2 - 52.5) | 21.4 (0.0 - 53.9)    | 54.1 (31.0 - 77.3) | *                    |
| Stage II                 | 50.6 (30.9 - 70.3) | 39.5 (22.2 - 56.9)       | *                    | *                     | *                                 | *                    | 35.5 (22.9 - 48.1) | *                            | *                    | 33.6 (27.1 - 40.0) | 36.2 (12.2 - 60.1)   | 32.4 (21.3 - 43.5) | 32.7 (12.6 - 54.7)** |
| Stage III                | 20.7 (14.6 - 26.9) | 18.7 (14.0 - 23.4)       | 15.7 (8.9 - 24.4)**  | 27.1 (16.5 - 38.8)**  | 18.9 (7.2 - 34.9)**               | 15.9 (8.7 - 25.1)**  | 22.3 (18.9 - 25.7) | 29.3 (3.4 - 64.0)**°         | 23.3 (14.0 - 34.0)** | 13.9 (12.5 - 15.3) | 10.6 (4.8 - 16.3)    | 14.7 (11.3 - 18.0) | 11.1 (7.5 - 15.4)**  |
| Stage IV                 | 3.5 (2.1 - 4.9)    | 4.3 (2.6 - 6.0)          | 4.5 (2.3 - 7.7)**    | 4.1 (1.9 - 7.6)**     | 7.4 (3.4 - 13.4)**                | 3.3 (1.7 - 5.9)**    | 4.3 (3.3 - 5.3)    | 3.6 (0.2 - 16.2)**°          | 3.9 (1.8 - 7.1)**    | 2.6 (2.2 - 3.1)    | 1.3 (0.0 - 2.9)      | 2.3 (1.5 - 3.1)    | 3.3 (2.0 - 5.1)**    |
| <b>Mapped SEER stage</b> |                    |                          |                      |                       |                                   |                      |                    |                              |                      |                    |                      |                    |                      |
| Localised                | 39.6 (20.0 - 59.2) | *                        | *                    | *                     | *                                 | *                    | 55.2 (41.8 - 68.7) | *                            | *                    | 43.5 (38.1 - 48.8) | 21.5 (0.0 - 48.2)    | 39.3 (26.2 - 52.4) | *                    |
| Regional                 | 25.4 (19.4 - 31.4) | 21.5 (15.3 - 28.3)**     | 23.1 (14.2 - 33.3)** | 29.7 (20.0 - 40.1)**  | 20.4 (6.8 - 39.0)**               | 19.4 (11.8 - 28.5)** | 24.9 (21.7 - 28.2) | 31.6 (6.3 - 61.9)**          | 25.0 (16.0 - 35.1)** | 18.5 (16.5 - 20.6) | 13.0 (7.8 - 18.3)    | 18.7 (14.7 - 22.8) | 13.8 (9.3 - 19.2)**  |
| Distant                  | 3.5 (2.1 - 4.9)    | 3.9 (2.3 - 6.1)**        | 5.4 (3.1 - 8.6)**    | 4.1 (1.9 - 7.6)**     | 6.1 (2.7 - 11.5)**                | 3.3 (1.7 - 5.9)**    | 4.1 (3.2 - 5.1)    | 5.1 (0.6 - 17.4)**           | 3.9 (1.8 - 7.1)**    | 3.7 (3.2 - 4.2)    | 1.5 (0.0 - 3.2)      | 3.1 (2.2 - 4.0)    | 2.8 (1.5 - 4.8)**    |

<sup>1</sup>NS = Net Survival; CI = Confidence Interval

\* <30 patients

\*\* Non-imputed results - imputation model did not converge

° No age standardisation

<sup>a</sup> Standard population used for age-standardisation is International Cancer Survival Standard (ICSS-1) derived in Corazziari et al. (2004)



**Supplementary Table 11.** Age-standardised\* one- and three-year net survival (%) by (imputed) stage at diagnosis and country for non-small cell lung carcinoma patients diagnosed during 2010-2014, males

|                                 | Stage             | Australia <sup>†</sup> | Canada <sup>†</sup> | Denmark            | Ireland <sup>†</sup> | New Zealand        | Norway             | United Kingdom <sup>†</sup> |                    |
|---------------------------------|-------------------|------------------------|---------------------|--------------------|----------------------|--------------------|--------------------|-----------------------------|--------------------|
| 1-year NS (95% CI) <sup>‡</sup> | All patients      | 47.1 (45.8 - 48.3)     | 48.1 (47.2 - 48.9)  | 45.0 (43.4 - 46.7) | 41.8 (39.7 - 43.9)   | 41.5 (39.3 - 43.7) | 46.9 (44.8 - 49.0) | 40.8 (40.3 - 41.4)          |                    |
|                                 | TNM Stage         |                        |                     |                    |                      |                    |                    |                             |                    |
|                                 | Stage I           |                        | 91.6 (90.5 - 92.6)  | 92.0 (88.8 - 95.1) | 86.3 (81.6 - 91.1)   |                    |                    | 92.6 (89.8 - 95.4)          | 88.5 (87.3 - 89.7) |
|                                 | Stage II          |                        | 80.2 (77.2 - 83.2)  | 84.4 (81.9 - 86.8) | 69.8 (61.7 - 78.0)   |                    |                    | 78.6 (74.5 - 82.7)          | 76.3 (74.6 - 78.1) |
|                                 | Stage III         |                        | 56.6 (54.8 - 58.5)  | 56.0 (52.8 - 59.2) | 45.3 (41.0 - 49.6)   |                    |                    | 50.2 (44.9 - 55.5)          | 50.3 (49.0 - 51.6) |
|                                 | Stage IV          |                        | 23.6 (22.6 - 24.5)  | 21.2 (19.3 - 23.1) | 19.8 (17.3 - 22.3)   |                    |                    | 21.8 (19.3 - 24.2)          | 18.8 (18.2 - 19.4) |
|                                 | Mapped SEER stage |                        |                     |                    |                      |                    |                    |                             |                    |
|                                 | Localised         | 81.6 (79.0 - 84.2)     | 91.1 (89.8 - 92.3)  | 87.9 (85.4 - 90.3) | 81.7 (78.4 - 85.0)   | 90.7 (86.4 - 95.0) | 81.7 (78.5 - 84.9) | 87.0 (86.0 - 88.0)          |                    |
|                                 | Regional          | 67.4 (64.6 - 70.2)     | 67.2 (65.9 - 68.6)  | 66.3 (63.6 - 69.0) | 48.2 (44.0 - 52.4)   | 64.5 (60.2 - 68.8) | 58.8 (55.5 - 62.2) | 59.9 (58.7 - 61.0)          |                    |
|                                 | Distant           | 25.6 (23.8 - 27.4)     | 23.6 (22.7 - 24.6)  | 23.0 (21.1 - 24.8) | 21.9 (19.5 - 24.3)   | 22.2 (19.5 - 24.9) | 23.1 (20.6 - 25.5) | 20.2 (19.6 - 20.8)          |                    |
| 3-year NS (95% CI) <sup>‡</sup> | All patients      | 23.6 (22.6 - 24.7)     | 27.1 (26.4 - 27.9)  | 22.4 (21.0 - 23.8) | 20.7 (19.1 - 22.3)   | 20.3 (18.4 - 22.2) | 24.7 (22.8 - 26.6) | 19.7 (19.2 - 20.1)          |                    |
|                                 | TNM Stage         |                        |                     |                    |                      |                    |                    |                             |                    |
|                                 | Stage I           |                        | 74.4 (72.6 - 76.2)  | 74.7 (69.5 - 79.9) | 64.8 (58.5 - 71.0)   |                    |                    | 77.4 (71.9 - 82.8)          | 68.2 (66.2 - 70.2) |
|                                 | Stage II          |                        | 54.0 (49.6 - 58.5)  | 60.4 (56.7 - 64.1) | 46.1 (39.8 - 52.5)   |                    |                    | 55.0 (49.7 - 60.4)          | 48.9 (46.9 - 51.0) |
|                                 | Stage III         |                        | 25.6 (24.0 - 27.3)  | 22.6 (19.8 - 25.4) | 17.1 (13.9 - 20.2)   |                    |                    | 19.3 (14.7 - 24.0)          | 18.3 (17.2 - 19.4) |
|                                 | Stage IV          |                        | 6.8 (6.2 - 7.5)     | 3.9 (2.9 - 4.9)    | 5.3 (4.0 - 6.6)      |                    |                    | 4.3 (2.8 - 5.7)             | 4.0 (3.7 - 4.3)    |
|                                 | Mapped SEER stage |                        |                     |                    |                      |                    |                    |                             |                    |
|                                 | Localised         | 60.2 (56.7 - 63.7)     | 73.8 (71.6 - 75.9)  | 69.2 (65.7 - 72.6) | 59.6 (55.5 - 63.7)   | 80.3 (73.2 - 87.5) | 64.6 (60.5 - 68.6) | 65.5 (63.9 - 67.1)          |                    |
|                                 | Regional          | 35.1 (32.1 - 38.0)     | 39.1 (37.6 - 40.6)  | 33.8 (30.8 - 36.8) | 21.8 (18.7 - 25.0)   | 31.0 (26.3 - 35.7) | 28.0 (24.5 - 31.5) | 27.4 (26.3 - 28.5)          |                    |
|                                 | Distant           | 7.2 (6.1 - 8.3)        | 6.9 (6.3 - 7.6)     | 4.6 (3.7 - 5.6)    | 6.0 (4.7 - 7.3)      | 5.1 (3.6 - 6.6)    | 5.7 (4.2 - 7.2)    | 4.1 (3.8 - 4.4)             |                    |

<sup>‡</sup>NS = Net Survival; CI = Confidence Interval

<sup>†</sup>Australia includes New South Wales; Canada includes Alberta, British Columbia, New Brunswick, Manitoba, Newfoundland, Nova Scotia, Ontario, Prince Edward Island, and Saskatchewan; Ireland (2010-2013); United Kingdom includes England, Northern Ireland, Scotland, and Wales

\* Standard population used for age-standardisation is International Cancer Survival Standard (ICSS-1) derived in Corazziari et al. (2004)

**Supplementary Table 12.** Age-standardised\* one- and three-year net survival (%) by (imputed) stage at diagnosis and country for non-small cell lung carcinoma patients diagnosed during 2010-2014, females

| Stage                                 | Australia <sup>†</sup> | Canada <sup>†</sup> | Denmark            | Ireland <sup>†</sup> | New Zealand        | Norway             | United Kingdom <sup>†</sup> |
|---------------------------------------|------------------------|---------------------|--------------------|----------------------|--------------------|--------------------|-----------------------------|
| All patients <sup>‡</sup>             | 55.0 (53.6 - 56.4)     | 57.8 (56.9 - 58.6)  | 53.8 (52.1 - 55.5) | 54.4 (52.1 - 56.6)   | 49.0 (46.7 - 51.2) | 54.6 (52.4 - 56.7) | 48.3 (47.7 - 48.8)          |
| <b>TNM Stage</b>                      |                        |                     |                    |                      |                    |                    |                             |
| Stage I                               |                        | 94.4 (93.5 - 95.2)  | 92.7 (90.5 - 94.9) | 94.0 (91.1 - 97.0)   |                    | 95.4 (92.9 - 98.0) | 92.6 (91.7 - 93.5)          |
| Stage II                              |                        | 83.7 (81.6 - 85.9)  | 89.9 (87.8 - 92.1) | 79.6 (75.7 - 83.6)   |                    | 87.3 (82.1 - 92.6) | 80.7 (79.2 - 82.3)          |
| Stage III                             |                        | 63.8 (61.9 - 65.7)  | 63.7 (59.5 - 67.9) | 54.6 (50.3 - 58.9)   |                    | 58.9 (53.8 - 63.9) | 55.0 (53.7 - 56.3)          |
| Stage IV                              |                        | 31.2 (30.1 - 32.3)  | 31.0 (29.0 - 33.0) | 25.7 (22.5 - 28.9)   |                    | 24.9 (22.1 - 27.6) | 24.8 (24.1 - 25.4)          |
| <b>Mapped SEER stage</b>              |                        |                     |                    |                      |                    |                    |                             |
| Localised                             | 88.2 (85.7 - 90.6)     | 94.3 (93.2 - 95.3)  | 91.7 (90.1 - 93.4) | 89.1 (86.5 - 91.7)   | 96.3 (93.4 - 99.2) | 87.4 (84.9 - 89.8) | 91.7 (91.0 - 92.5)          |
| Regional                              | 73.6 (70.6 - 76.6)     | 73.8 (72.5 - 75.1)  | 72.5 (69.1 - 75.8) | 60.2 (56.5 - 64.0)   | 75.2 (70.7 - 79.7) | 70.2 (67.2 - 73.2) | 63.3 (62.1 - 64.4)          |
| Distant                               | 32.2 (30.0 - 34.5)     | 31.3 (30.3 - 32.4)  | 32.4 (30.4 - 34.4) | 27.9 (24.8 - 31.1)   | 29.5 (26.6 - 32.5) | 25.4 (22.7 - 28.2) | 25.9 (25.2 - 26.6)          |
| <b>1-year NS (95% CI)<sup>‡</sup></b> |                        |                     |                    |                      |                    |                    |                             |
| All patients <sup>‡</sup>             | 30.3 (29.0 - 31.7)     | 35.0 (34.2 - 35.9)  | 30.8 (29.2 - 32.4) | 32.5 (30.4 - 34.6)   | 25.9 (23.9 - 28.0) | 32.1 (30.1 - 34.1) | 25.3 (24.8 - 25.9)          |
| <b>TNM Stage</b>                      |                        |                     |                    |                      |                    |                    |                             |
| Stage I                               |                        | 81.6 (80.2 - 83.1)  | 80.7 (74.4 - 87.1) | 83.0 (78.3 - 87.8)   |                    | 82.9 (78.4 - 87.5) | 76.7 (75.1 - 78.3)          |
| Stage II                              |                        | 61.5 (58.6 - 64.3)  | 72.9 (68.9 - 76.9) | 58.2 (53.6 - 62.8)   |                    | 59.9 (51.8 - 68.0) | 54.9 (52.7 - 57.2)          |
| Stage III                             |                        | 30.6 (28.7 - 32.5)  | 31.1 (27.6 - 34.5) | 23.6 (19.5 - 27.6)   |                    | 24.9 (20.0 - 29.8) | 22.2 (20.9 - 23.5)          |
| Stage IV                              |                        | 9.3 (8.5 - 10.1)    | 8.3 (7.1 - 9.5)    | 6.9 (5.0 - 8.7)      |                    | 5.9 (4.4 - 7.5)    | 5.6 (5.2 - 6.0)             |
| <b>Mapped SEER stage</b>              |                        |                     |                    |                      |                    |                    |                             |
| Localised                             | 71.7 (68.3 - 75.2)     | 82.3 (80.6 - 84.0)  | 78.8 (76.2 - 81.3) | 74.5 (70.9 - 78.1)   | 84.6 (74.9 - 94.2) | 70.7 (66.7 - 74.6) | 73.9 (72.7 - 75.2)          |
| Regional                              | 42.4 (39.0 - 45.9)     | 46.1 (44.4 - 47.7)  | 42.5 (38.8 - 46.3) | 31.6 (27.6 - 35.5)   | 40.9 (35.3 - 46.5) | 36.2 (31.9 - 40.4) | 30.4 (29.2 - 31.7)          |
| Distant                               | 9.4 (8.0 - 10.8)       | 9.4 (8.6 - 10.2)    | 9.3 (8.0 - 10.5)   | 7.6 (5.7 - 9.4)      | 8.6 (6.7 - 10.4)   | 7.2 (5.6 - 8.7)    | 5.5 (5.1 - 5.9)             |
| <b>3-year NS (95% CI)<sup>‡</sup></b> |                        |                     |                    |                      |                    |                    |                             |

<sup>‡</sup>NS = Net Survival; CI = Confidence Interval

<sup>†</sup>Australia includes New South Wales; Canada includes Alberta, British Columbia, New Brunswick, Manitoba, Newfoundland, Nova Scotia, Ontario, Prince Edward Island, and Saskatchewan; Ireland (2010-2013); United Kingdom includes England, Northern Ireland, Scotland, and Wales

\* Standard population used for age-standardisation is International Cancer Survival Standard (ICSS-1) derived in Corazziari et al. (2004)

**Supplementary Table 13.** Age-standardised<sup>o</sup> one- and three-year net survival (%) by (imputed) stage at diagnosis and country for small cell lung carcinoma patients diagnosed during 2010-2014, males

|                    | Stage                          | Australia <sup>†</sup> | Canada <sup>†</sup> | Denmark            | Ireland <sup>†</sup> | New Zealand          | Norway             | United Kingdom <sup>†</sup> |  |
|--------------------|--------------------------------|------------------------|---------------------|--------------------|----------------------|----------------------|--------------------|-----------------------------|--|
| 1-year NS (95% CI) | All patients <sup>‡</sup>      | 31.8 (28.6 - 35.1)     | 28.6 (26.6 - 30.7)  | 31.0 (27.1 - 34.9) | 26.7 (22.1 - 31.5)   | 25.0 (20.6 - 29.6)   | 30.6 (26.4 - 34.9) | 25.0 (23.9 - 26.1)          |  |
|                    | TNM Stage <sup>p</sup>         |                        |                     |                    |                      |                      |                    |                             |  |
|                    | Stage I                        |                        | 78.0 (68.9 - 87.1)  | *                  | *                    |                      | *                  | 75.9 (69.4 - 82.5)          |  |
|                    | Stage II                       |                        | 72.0 (62.7 - 81.2)  | 85.5 (75.3 - 95.8) | *                    |                      | 60.0 (43.7 - 76.2) | 65.4 (59.1 - 71.7)          |  |
|                    | Stage III                      |                        | 50.0 (46.0 - 54.0)  | 54.3 (46.5 - 62.0) | 41.8 (31.6 - 52.0)   |                      | 54.3 (46.0 - 62.6) | 43.7 (41.3 - 46.2)          |  |
|                    | Stage IV                       |                        | 17.3 (15.7 - 18.9)  | 22.4 (19.3 - 25.6) | 16.7 (12.4 - 21.0)   |                      | 15.2 (10.9 - 19.5) | 15.1 (14.2 - 16.1)          |  |
|                    | Mapped SEER stage <sup>p</sup> |                        |                     |                    |                      |                      |                    |                             |  |
|                    | Localised                      | 58.3 (46.5 - 70.1)     | 82.2 (72.4 - 91.9)  | 79.5 (60.1 - 98.9) | *                    | *                    | 58.6 (44.4 - 72.8) | 69.7 (62.9 - 76.4)          |  |
|                    | Regional                       | 60.0 (51.5 - 68.4)     | 52.6 (48.9 - 56.2)  | 63.0 (54.0 - 71.9) | 41.3 (32.0 - 50.6)   | 39.8 (26.8 - 52.4)** | 57.7 (50.7 - 64.8) | 48.5 (45.7 - 51.3)          |  |
|                    | Distant                        | 20.2 (16.7 - 23.7)     | 17.3 (15.7 - 18.9)  | 24.3 (21.3 - 27.4) | 17.8 (13.6 - 21.9)   | 13.5 (9.6 - 18.0)**  | 13.7 (10.4 - 17.0) | 17.7 (16.8 - 18.7)          |  |
| 3-year NS (95% CI) | All patients <sup>‡</sup>      | 8.1 (6.3 - 10.2)       | 9.1 (7.6 - 10.7)    | 7.3 (5.4 - 9.7)    | 7.5 (5.2 - 10.4)     | 6.9 (3.8 - 11.1)     | 9.7 (7.0 - 13.0)   | 6.3 (5.7 - 6.9)             |  |
|                    | TNM Stage <sup>p</sup>         |                        |                     |                    |                      |                      |                    |                             |  |
|                    | Stage I                        |                        | 48.4 (35.8 - 61.0)  | *                  | *                    |                      | *                  | 39.3 (30.6 - 47.9)          |  |
|                    | Stage II                       |                        | 33.0 (23.1 - 42.8)  | 39.9 (18.7 - 61.2) | *                    |                      | 30.7 (15.9 - 45.5) | 32.7 (25.0 - 40.4)          |  |
|                    | Stage III                      |                        | 17.2 (14.1 - 20.2)  | 19.5 (13.7 - 25.3) | 13.0 (6.9 - 19.2)    |                      | 22.9 (16.7 - 29.2) | 11.5 (9.6 - 13.3)           |  |
|                    | Stage IV                       |                        | 3.8 (3.0 - 4.6)     | 3.2 (1.9 - 4.5)    | 2.0 (0.4 - 3.7)      |                      | 1.3 (0.2 - 2.4)    | 2.0 (1.5 - 2.5)             |  |
|                    | Mapped SEER stage <sup>p</sup> |                        |                     |                    |                      |                      |                    |                             |  |
|                    | Localised                      | 26.1 (15.6 - 36.6)     | 42.9 (28.4 - 57.4)  | 48.3 (29.8 - 66.9) | *                    | *                    | 30.0 (17.7 - 42.4) | 36.2 (28.6 - 43.8)          |  |
|                    | Regional                       | 19.6 (13.3 - 25.9)     | 20.3 (17.3 - 23.4)  | 21.3 (13.9 - 28.6) | 15.8 (9.5 - 22.1)    | 20.9 (10.4 - 33.7)** | 23.9 (17.8 - 30.0) | 15.8 (13.5 - 18.1)          |  |
|                    | Distant                        | 2.2 (0.9 - 3.5)        | 3.8 (3.0 - 4.6)     | 4.6 (3.1 - 6.0)    | 2.2 (0.7 - 3.8)      | 4.3 (2.3 - 7.2)**    | 1.3 (0.3 - 2.3)    | 2.6 (2.1 - 3.0)             |  |

<sup>‡</sup>NS = Net Survival; CI = Confidence Interval

<sup>†</sup>Australia includes New South Wales; Canada includes Alberta, British Columbia, New Brunswick, Manitoba, Newfoundland, Nova Scotia, Ontario, Prince Edward Island, and Saskatchewan; Ireland (2010-2013); United Kingdom includes England, Northern Ireland, Scotland, and Wales

\* <30 patients

\*\* Non-imputed results - imputation model did not converge

<sup>o</sup> Standard population used for age-standardisation is International Cancer Survival Standard (ICSS-1) derived in Corazziari et al. (2004)

**Supplementary Table 14.** Age-standardised<sup>o</sup> one- and three-year net survival (%) by (imputed) stage at diagnosis and country for small cell lung carcinoma patients diagnosed during 2010-2014, females

|                                 | Stage             | Australia <sup>†</sup> | Canada <sup>†</sup> | Denmark            | Ireland <sup>†</sup> | New Zealand          | Norway             | United Kingdom <sup>†</sup> |  |
|---------------------------------|-------------------|------------------------|---------------------|--------------------|----------------------|----------------------|--------------------|-----------------------------|--|
| 1-year NS (95% CI) <sup>‡</sup> | All patients      | 38.4 (35.0 - 41.8)     | 39.2 (36.9 - 41.4)  | 38.8 (35.2 - 42.3) | 35.1 (30.2 - 40.0)   | 33.3 (27.9 - 38.8)   | 37.4 (32.4 - 42.4) | 31.2 (29.9 - 32.4)          |  |
|                                 | TNM Stage         |                        |                     |                    |                      |                      |                    |                             |  |
|                                 | Stage I           |                        | 86.6 (80.1 - 93.0)  | *                  | *                    |                      | *                  | 79.7 (73.7 - 85.8)          |  |
|                                 | Stage II          |                        | 76.8 (68.4 - 85.2)  | 76.7 (63.1 - 90.3) | 69.2 (54.2 - 84.2)   |                      | 86.4 (74.9 - 97.9) | 69.6 (63.3 - 75.9)          |  |
|                                 | Stage III         |                        | 56.3 (52.9 - 59.7)  | 54.8 (48.3 - 61.4) | 49.1 (40.7 - 57.6)   |                      | 53.2 (44.1 - 62.3) | 50.5 (48.2 - 52.8)          |  |
|                                 | Stage IV          |                        | 23.7 (21.8 - 25.7)  | 26.2 (22.9 - 29.5) | 21.5 (16.6 - 26.4)   |                      | 23.9 (19.5 - 28.3) | 18.9 (17.8 - 20.0)          |  |
|                                 | Mapped SEER stage |                        |                     |                    |                      |                      |                    |                             |  |
|                                 | Localised         | 62.8 (50.5 - 75.2)     | 84.7 (76.9 - 92.5)  | 79.4 (66.0 - 92.8) | *                    | *                    | 71.2 (59.0 - 83.4) | 75.5 (70.0 - 81.1)          |  |
|                                 | Regional          | 66.4 (58.7 - 74.1)     | 59.7 (56.5 - 62.9)  | 61.7 (54.1 - 69.3) | 51.5 (43.3 - 59.7)   | 48.4 (34.0 - 61.3)** | 57.2 (49.5 - 64.8) | 56.5 (53.9 - 59.2)          |  |
|                                 | Distant           | 25.7 (21.0 - 30.4)     | 23.6 (21.7 - 25.5)  | 28.7 (25.5 - 31.9) | 23.5 (18.6 - 28.4)   | 17.2 (12.5 - 22.6)** | 22.1 (18.1 - 26.1) | 22.5 (21.4 - 23.6)          |  |
| 3-year NS (95% CI) <sup>‡</sup> | All patients      | 12.0 (9.7 - 14.5)      | 13.8 (11.9 - 15.8)  | 12.0 (8.9 - 15.6)  | 11.0 (8.1 - 14.4)    | 10.4 (7.4 - 13.9)    | 12.8 (9.3 - 17.0)  | 9.2 (8.4 - 10.0)            |  |
|                                 | TNM Stage         |                        |                     |                    |                      |                      |                    |                             |  |
|                                 | Stage I           |                        | 58.0 (47.8 - 68.1)  | *                  | *                    |                      | *                  | 51.9 (44.2 - 59.7)          |  |
|                                 | Stage II          |                        | 39.8 (28.4 - 51.3)  | 59.9 (44.2 - 75.7) | 43.3 (24.3 - 62.3)   |                      | 49.7 (33.3 - 66.1) | 37.0 (30.2 - 43.8)          |  |
|                                 | Stage III         |                        | 24.2 (21.2 - 27.2)  | 22.7 (17.4 - 28.0) | 18.6 (12.7 - 24.6)   |                      | 20.0 (12.9 - 27.2) | 15.6 (13.9 - 17.3)          |  |
|                                 | Stage IV          |                        | 4.8 (3.8 - 5.8)     | 4.5 (3.0 - 6.0)    | 2.6 (0.8 - 4.3)      |                      | 2.1 (0.7 - 3.5)    | 3.2 (2.7 - 3.7)             |  |
|                                 | Mapped SEER stage |                        |                     |                    |                      |                      |                    |                             |  |
|                                 | Localised         | 30.2 (18.0 - 42.4)     | 53.3 (41.6 - 64.9)  | 63.8 (47.6 - 80.0) | *                    | *                    | 40.3 (27.7 - 53.0) | 47.7 (41.1 - 54.3)          |  |
|                                 | Regional          | 25.1 (18.6 - 31.7)     | 27.3 (24.4 - 30.3)  | 33.2 (26.0 - 40.4) | 22.0 (15.7 - 28.4)   | 14.7 (7.0 - 25.2)**  | 21.2 (15.0 - 27.4) | 19.6 (17.4 - 21.9)          |  |
|                                 | Distant           | 6.5 (3.7 - 9.4)        | 4.8 (3.8 - 5.7)     | 5.7 (4.1 - 7.2)    | 3.5 (1.6 - 5.5)      | 2.9 (1.3 - 5.7)**    | 2.3 (0.9 - 3.7)    | 4.5 (3.9 - 5.1)             |  |

<sup>‡</sup>NS = Net Survival; CI = Confidence Interval

<sup>†</sup>Australia includes New South Wales; Canada includes Alberta, British Columbia, New Brunswick, Manitoba, Newfoundland, Nova Scotia, Ontario, Prince Edward Island, and Saskatchewan; Ireland (2010-2013); United Kingdom includes England, Northern Ireland, Scotland, and Wales

\* <30 patients

\*\* Non-imputed results - imputation model did not converge

<sup>o</sup> Standard population used for age-standardisation is International Cancer Survival Standard (ICSS-1) derived in Corazziari et al. (2004)

**Supplementary Table 15.** Number and proportion of male patients with non-small cell lung carcinoma (NSCLC) and small cell lung carcinoma (SCLC) diagnosed during 2010-2014 by jurisdiction and stage at diagnosis (TNM and mapped SEER), before and after imputation

|                              | TNM stage    | NSCLC |            |                         |                  |          |                  |            |                         | SCLC             |          |                  |        |            |                         |                  |          | Mapped SEER      |            |                         |        |   |  |  |  |
|------------------------------|--------------|-------|------------|-------------------------|------------------|----------|------------------|------------|-------------------------|------------------|----------|------------------|--------|------------|-------------------------|------------------|----------|------------------|------------|-------------------------|--------|---|--|--|--|
|                              |              | Stage | Number     | Median age at diagnosis |                  | %        |                  | Number     | Median age at diagnosis |                  | %        |                  | Stage  | Number     | Median age at diagnosis |                  | %        |                  | Number     | Median age at diagnosis |        | % |  |  |  |
|                              |              |       |            | Observed                | After imputation | Observed | After imputation |            | Observed                | After imputation | Observed | After imputation |        |            | Observed                | After imputation | Observed | After imputation |            |                         |        |   |  |  |  |
| Canada, Alberta              | All patients | 3453  | 70 (62-77) |                         |                  |          | 590              | 68 (62-76) |                         |                  |          | All patients     | 3,453  | 70 (62-77) |                         |                  |          | 590              | 68 (62-76) |                         |        |   |  |  |  |
|                              | Missing      | 39    | 77 (68-81) | 1.1                     |                  |          | 3                | 77 (76-80) | 0.5                     |                  |          | Missing          | 5      | 70 (59-81) | 0.1                     |                  |          | 2                | 77 (76-77) | 0.3                     |        |   |  |  |  |
|                              | I            | 592   | 71 (64-77) | 17.3                    | 17.8             |          | 21               | 73 (63-82) | 3.6                     | 4.4              |          | Localised        | 432    | 72 (65-78) | 12.5                    | 12.7             |          | 15               | 72 (64-83) | 2.6                     | 2.6 *  |   |  |  |  |
|                              | II           | 310   | 71 (62-76) | 9.1                     | 9.3              |          | 23               | 68 (63-73) | 3.9                     | 4.1              |          | Regional         | 1,125  | 70 (63-76) | 32.6                    | 33.4             |          | 144              | 67 (62-75) | 24.5                    | 24.5 * |   |  |  |  |
|                              | III          | 625   | 69 (62-76) | 18.3                    | 18.7             |          | 114              | 67 (62-75) | 19.4                    | 22.0             |          | Distant          | 1,891  | 69 (61-77) | 54.8                    | 53.9             |          | 429              | 68 (62-76) | 73.0                    | 73.0 * |   |  |  |  |
|                              | IV           | 1,887 | 69 (61-77) | 55.3                    | 54.1             |          | 429              | 68 (62-76) | 73.1                    | 69.5             |          |                  |        |            |                         |                  |          |                  |            |                         |        |   |  |  |  |
| Canada, British Columbia     | All patients | 5188  | 71 (63-78) |                         |                  |          | 736              | 69 (62-77) |                         |                  |          | All patients     | 5,188  | 71 (63-78) |                         |                  |          | 736              | 69 (62-77) |                         |        |   |  |  |  |
|                              | Missing      | 255   | 75 (68-81) | 4.9                     |                  |          | 31               | 73 (64-79) | 4.2                     |                  |          | Missing          | 170    | 76 (70-81) | 3.3                     |                  |          | 23               | 73 (66-78) | 3.1                     |        |   |  |  |  |
|                              | I            | 786   | 71 (64-78) | 15.9                    | 17.0             |          | 13               | 77 (70-79) | 1.8                     | 1.8 *            |          | Localised        | 519    | 71 (64-78) | 10.3                    | 10.8             |          | 10               | 77 (76-82) | 1.4                     | 1.4 *  |   |  |  |  |
|                              | II           | 460   | 71 (64-78) | 9.3                     | 9.7              |          | 26               | 70 (66-80) | 3.7                     | 3.7 *            |          | Regional         | 1,914  | 72 (64-78) | 38.1                    | 38.1             |          | 210              | 70 (63-77) | 29.5                    | 29.5 * |   |  |  |  |
|                              | III          | 1107  | 71 (64-78) | 22.4                    | 21.8             |          | 173              | 69 (63-77) | 24.5                    | 24.5 *           |          | Distant          | 2,585  | 70 (62-77) | 51.5                    | 51.1             |          | 493              | 69 (61-76) | 69.1                    | 69.1 * |   |  |  |  |
|                              | IV           | 2580  | 70 (62-77) | 52.3                    | 51.5             |          | 493              | 69 (61-76) | 69.9                    | 69.9 *           |          |                  |        |            |                         |                  |          |                  |            |                         |        |   |  |  |  |
| Canada, Manitoba             | All patients | 1233  | 69 (62-76) |                         |                  |          | 203              | 67 (60-74) |                         |                  |          | All patients     | 1,233  | 69 (62-76) |                         |                  |          | 203              | 67 (60-74) |                         |        |   |  |  |  |
|                              | Missing      | 11    | 66 (54-75) | 0.9                     |                  |          | 6                | 72 (63-77) | 3.0                     |                  |          | Missing          | 1      | 54 (54-54) | 0.1                     |                  |          | 1                | 65 (65-65) | 0.5                     |        |   |  |  |  |
|                              | I            | 155   | 69 (63-75) | 12.7                    | 12.1             |          | 7                | 69 (59-75) | 3.6                     | 3.6 *            |          | Localised        | 240    | 69 (63-76) | 19.5                    | 20.3             |          | 9                | 74 (64-77) | 4.5                     | 4.5 *  |   |  |  |  |
|                              | II           | 247   | 70 (64-77) | 20.2                    | 18.7             |          | 10               | 75 (65-77) | 5.1                     | 5.1 *            |          | Regional         | 331    | 70 (64-76) | 26.9                    | 24.4             |          | 40               | 69 (63-76) | 19.8                    | 19.8 * |   |  |  |  |
|                              | III          | 226   | 69 (62-76) | 18.5                    | 18.9             |          | 39               | 67 (59-73) | 19.8                    | 19.8 *           |          | Distant          | 661    | 68 (61-76) | 53.7                    | 55.3             |          | 153              | 66 (59-73) | 75.7                    | 75.7 * |   |  |  |  |
|                              | IV           | 594   | 68 (61-75) | 48.6                    | 50.3             |          | 141              | 67 (59-74) | 71.6                    | 71.6 *           |          |                  |        |            |                         |                  |          |                  |            |                         |        |   |  |  |  |
| Canada, New Brunswick        | All patients | 1355  | 70 (63-76) |                         |                  |          | 243              | 68 (61-74) |                         |                  |          | All patients     | 1,355  | 70 (63-76) |                         |                  |          | 243              | 68 (61-74) |                         |        |   |  |  |  |
|                              | Missing      | 16    | 72 (67-80) | 1.2                     |                  |          | 2                | 66 (59-73) | 0.8                     |                  |          | Missing          | 2      | 79 (71-86) | 0.1                     |                  |          | 1                | 59 (59-59) | 0.4                     |        |   |  |  |  |
|                              | I            | 351   | 71 (65-78) | 26.2                    | 25.7             |          | 7                | 68 (62-74) | 2.9                     | 2.9 *            |          | Localised        | 266    | 70 (65-78) | 19.7                    | 20.4             |          | 5                | 70 (67-79) | 2.1                     | 2.1 *  |   |  |  |  |
|                              | II           | 136   | 71 (65-75) | 10.2                    | 9.5              |          | 12               | 66 (62-71) | 5.0                     | 5.0 *            |          | Regional         | 520    | 70 (63-76) | 38.4                    | 36.7             |          | 72               | 67 (61-73) | 29.8                    | 29.8 * |   |  |  |  |
|                              | III          | 285   | 69 (61-76) | 21.3                    | 21.7             |          | 57               | 67 (61-73) | 23.7                    | 23.7 *           |          | Distant          | 567    | 69 (62-75) | 41.9                    | 42.9             |          | 165              | 69 (61-74) | 68.2                    | 68.2 * |   |  |  |  |
|                              | IV           | 567   | 69 (62-75) | 42.3                    | 43.1             |          | 165              | 69 (61-74) | 68.5                    | 68.5 *           |          |                  |        |            |                         |                  |          |                  |            |                         |        |   |  |  |  |
| Canada, Newfoundland         | All patients | 838   | 69 (63-75) |                         |                  |          | 145              | 67 (60-73) |                         |                  |          | All patients     | 838    | 69 (63-75) |                         |                  |          | 145              | 67 (60-73) |                         |        |   |  |  |  |
|                              | Missing      | 13    | 69 (64-79) | 1.6                     |                  |          | 4                | 70 (60-76) | 2.8                     |                  |          | Missing          | 4      | 73 (61-79) | 0.5                     |                  |          |                  |            | 0.0                     |        |   |  |  |  |
|                              | I            | 131   | 71 (64-77) | 15.9                    | 15.7             |          | 7                | 76 (64-78) | 5.0                     | 5.0 *            |          | Localised        | 165    | 71 (65-77) | 19.8                    | 21.3             |          | 8                | 76 (65-78) | 5.5                     | 5.5 *  |   |  |  |  |
|                              | II           | 121   | 70 (64-75) | 14.7                    | 15.0             |          | 1                | 51 (51-51) | 0.7                     | 0.7 *            |          | Regional         | 278    | 68 (62-74) | 33.3                    | 30.3             |          | 30               | 67 (59-72) | 20.7                    | 20.7 * |   |  |  |  |
|                              | III          | 212   | 68 (61-73) | 25.7                    | 24.7             |          | 31               | 69 (60-73) | 22.0                    | 22.0 *           |          | Distant          | 391    | 68 (62-76) | 46.9                    | 48.3             |          | 107              | 67 (60-73) | 73.8                    | 73.8 * |   |  |  |  |
|                              | IV           | 361   | 68 (62-76) | 43.8                    | 44.7             |          | 102              | 67 (60-72) | 72.3                    | 72.3 *           |          |                  |        |            |                         |                  |          |                  |            |                         |        |   |  |  |  |
| Canada, Nova Scotia          | All patients | 1546  | 70 (63-76) |                         |                  |          | 226              | 69 (61-74) |                         |                  |          | All patients     | 1,546  | 70 (63-76) |                         |                  |          | 226              | 69 (61-74) |                         |        |   |  |  |  |
|                              | Missing      | 20    | 76 (69-86) | 1.3                     |                  |          | 0                | -          | 0.0                     |                  |          | Missing          | 10     | 75 (70-87) | 0.6                     |                  |          | 0                | -          | 0.0                     |        |   |  |  |  |
|                              | I            | 337   | 71 (64-77) | 22.1                    | 23.4             |          | 5                | 73 (69-78) | 2.2                     | 2.2 *            |          | Localised        | 284    | 71 (64-77) | 18.5                    | 20.6             |          | 4                | 71 (69-77) | 1.8                     | 1.8 *  |   |  |  |  |
|                              | II           | 170   | 71 (64-77) | 11.1                    | 10.6             |          | 4                | 68 (66-71) | 1.8                     | 1.8 *            |          | Regional         | 539    | 70 (64-77) | 35.1                    | 33.9             |          | 43               | 67 (61-74) | 19.0                    | 19.0 * |   |  |  |  |
|                              | III          | 306   | 70 (64-76) | 20.1                    | 20.0             |          | 38               | 67 (60-75) | 16.8                    | 16.8 *           |          | Distant          | 713    | 69 (62-76) | 46.4                    | 45.5             |          | 179              | 69 (61-74) | 79.2                    | 79.2 * |   |  |  |  |
|                              | IV           | 713   | 69 (62-76) | 46.7                    | 45.9             |          | 179              | 69 (61-74) | 79.2                    | 79.2 *           |          |                  |        |            |                         |                  |          |                  |            |                         |        |   |  |  |  |
| Canada, Ontario              | All patients | 16111 | 70 (63-77) |                         |                  |          | 2436             | 68 (61-76) |                         |                  |          | All patients     | 16,111 | 70 (63-77) |                         |                  |          | 2436             | 68 (61-76) |                         |        |   |  |  |  |
|                              | Missing      | 1579  | 70 (63-78) | 9.8                     |                  |          | 152              | 69 (61-75) | 6.2                     |                  |          | Missing          | 1,490  | 70 (63-78) | 9.2                     |                  |          | 145              | 69 (61-75) | 6.0                     |        |   |  |  |  |
|                              | I            | 2816  | 72 (65-78) | 19.4                    | 20.2             |          | 64               | 74 (64-79) | 2.8                     | 3.0              |          | Localised        | 2,205  | 72 (65-78) | 15.1                    | 16.0             |          | 53               | 74 (66-79) | 2.3                     | 2.5    |   |  |  |  |
|                              | II           | 1455  | 71 (64-77) | 10.0                    | 10.3             |          | 58               | 70 (62-75) | 2.5                     | 2.9              |          | Regional         | 5,234  | 71 (63-77) | 35.8                    | 36.1             |          | 564              | 68 (62-75) | 24.6                    | 26.3   |   |  |  |  |
|                              | III          | 3078  | 70 (63-77) | 21.2                    | 21.3             |          | 488              | 68 (62-75) | 21.4                    | 22.6             |          | Distant          | 7,182  | 70 (62-77) | 49.1                    | 47.9             |          | 1674             | 68 (61-76) | 73.1                    | 71.2   |   |  |  |  |
|                              | IV           | 7183  | 70 (62-77) | 49.4                    | 48.3             |          | 1674             | 68 (61-76) | 73.3                    | 71.4             |          |                  |        |            |                         |                  |          |                  |            |                         |        |   |  |  |  |
| Canada, Prince Edward Island | All patients | 231   | 68 (63-75) |                         |                  |          | 37               | 71 (64-77) |                         |                  |          | All patients     | 231    | 68 (63-75) |                         |                  |          | 37               | 71 (64-77) |                         |        |   |  |  |  |
|                              | Missing      | 4     | 79 (57-86) | 1.7                     |                  |          | 0                | -          | 0.0                     |                  |          | Missing          | 3      | 76 (50-81) | 1.3                     |                  |          | 0                | -          | 0.0                     |        |   |  |  |  |
|                              | I            | 36    | 68 (59-73) | 15.9                    | 15.9 *           |          | 0                | -          | 0.0                     | 0.0 *            |          | Localised        | 32     | 68 (59-73) | 14.0                    | 15.5             |          | 0                | -          | 0.0                     | 0.0 *  |   |  |  |  |
|                              | II           | 21    | 67 (62-78) | 9.3                     | 9.3 *            |          | 3                | 77 (63-77) | 8.1                     | 8.1 *            |          | Regional         | 91     | 69 (64-75) | 39.9                    | 38.5             |          | 5                | 67 (65-77) | 13.5                    | 13.5 * |   |  |  |  |
|                              | III          | 65    | 70 (64-75) | 28.6                    | 28.6 *           |          | 2                | 67 (66-67) | 5.4                     | 5.4 *            |          | Distant          | 105    | 67 (63-75) | 46.1                    | 46.0             |          | 32               | 71 (64-76) | 86.5                    | 86.5 * |   |  |  |  |
|                              | IV           | 105   | 67 (63-75) | 46.3                    | 46.3 *           |          | 32               | 71 (64-76) | 86.5                    | 86.5 *           |          |                  |        |            |                         |                  |          |                  |            |                         |        |   |  |  |  |
| Canada, Saskatchewan         | All patients | 1187  | 71 (64-77) |                         |                  |          | 246              | 68 (61-74) |                         |                  |          | All patients     | 1,187  | 71 (64-77) |                         |                  |          | 246              | 68 (61-74) |                         |        |   |  |  |  |
|                              | Missing      | 8     | 71 (69-84) | 0.7                     |                  |          | 4                | 67 (57-75) | 1.6                     |                  |          | Missing          | 1      | 68 (68-68) | 0.1                     |                  |          | 1                | 58 (58-58) | 0.4                     |        |   |  |  |  |
|                              | I            | 197   | 70 (65-76) | 16.7                    | 15.8             |          | 2                | 77 (73-81) | 0.8                     | 0.8 *            |          | Localised        | 146    | 70 (65-76) | 12.3                    | 12.0             |          | 3                | 75 (73-81) | 1.2                     | 1.2 *  |   |  |  |  |
|                              | II           | 102   | 75 (69-79) | 8.7                     | 8.5              |          | 5                | 68 (57-78) | 2.1                     | 2.1 *            |          | Regional         | 392    | 72 (65-77) | 33.1                    | 32.0             |          | 49               | 69 (58-75) | 20.0                    | 20.0 * |   |  |  |  |
|                              | III          | 233   | 70 (64-76) | 19.8                    | 19.4             |          | 42               | 70 (58-75) | 17.4                    | 17.4 *           |          | Distant          | 648    | 70 (63-77) | 54.6                    | 56.0             |          | 193              | 68 (61-74) | 78.8                    | 78.8 * |   |  |  |  |
|                              | IV           | 647   | 70 (63-77) | 54.9                    | 56.3             |          | 193              | 68 (61-74) | 79.8                    | 79.8 *           |          |                  |        |            |                         |                  |          |                  |            |                         |        |   |  |  |  |
| UK, England                  | All patients | 58417 | 71 (64-78) |                         |                  |          | 9791             | 70 (63-76) |                         |                  |          | All patients     | 58,417 | 71 (64-78) |                         |                  |          | 9791             | 70 (63-76) |                         |        |   |  |  |  |
|                              | Missing      | 22890 | 71 (64-78) | 39.2                    |                  |          | 3852             | 70 (63-76) | 39.3                    |                  |          | Missing          | 18,025 | 72 (64-79) | 30.9                    |                  |          | 3424             | 70 (63-76) | 35.0                    |        |   |  |  |  |
|                              | I            | 5163  | 72 (66-78) | 14.5                    | 14.6             |          | 147              | 73 (65-77) | 2.5                     | 2.5              |          | Localised        | 7,684  | 72 (66-78) | 19.0                    | 17.1             |          | 193              | 73 (65-77) | 3.0                     | 2.9    |   |  |  |  |
|                              | II           | 3663  | 72 (65-78) | 10.3                    | 10.1             |          | 184              | 71 (65-79) | 3.1                     | 3.0              |          | Regional         | 10,532 | 71 (65-77) | 36.1                    | 25.0             |          | 997              | 70 (64-77) | 15.7                    | 15.3   |   |  |  |  |
|                              | III          | 8311  | 71 (64-78) | 23.4                    | 23.0             |          | 1310             | 69 (63-76) | 22.1                    | 21.8             |          | Distant          | 22,176 | 70 (63-77) | 54.9                    | 57.9             |          | 5177             | 70 (63-76) | 81.3                    | 81.9   |   |  |  |  |
|                              | IV           | 18390 | 71 (64-77) | 51.8                    | 52.2             |          | 429              |            |                         |                  |          |                  |        |            |                         |                  |          |                  |            |                         |        |   |  |  |  |

**Supplementary Table 16.** Number and proportion of female patients with non-small cell lung carcinoma (NSCLC) and small cell lung carcinoma (SCLC) diagnosed during 2010-2014 by jurisdiction and stage at diagnosis (TNM and mapped SEER), before and after imputation

|                              |              | TNM stage  |                         |          |                  | SCLC       |                         |          |                  | Mapped SEER  |            |                         |          |                  |            |                         |          |                  |
|------------------------------|--------------|------------|-------------------------|----------|------------------|------------|-------------------------|----------|------------------|--------------|------------|-------------------------|----------|------------------|------------|-------------------------|----------|------------------|
|                              |              | NSCLC      |                         | %        |                  | SCLC       |                         | %        |                  | NSCLC        |            | SCLC                    |          | %                |            |                         |          |                  |
|                              | Stage        | Number     | Median age at diagnosis | Observed | After imputation | Number     | Median age at diagnosis | Observed | After imputation | Stage        | Number     | Median age at diagnosis | Observed | After imputation | Number     | Median age at diagnosis | Observed | After imputation |
| Canada, Alberta              | All patients | 3364       | 69 (61-76)              |          |                  | 607        | 68 (60-76)              |          |                  | All patients | 3,364      | 69 (61-76)              |          |                  | 607        | 68 (60-76)              |          |                  |
|                              | Missing      | 26         | 73 (63-82)              | 0.8      |                  | 3          | 83 (77-85)              | 0.5      |                  | Missing      | 8          | 75 (59-87)              | 0.2      |                  | 0          | -                       |          | 0.0              |
|                              | I            | 781        | 69 (62-76)              | 23.4     | 24.9             | 29         | 70 (62-76)              | 4.8      | 5.7              | Localised    | 559        | 70 (63-76)              | 16.7     | 17.7             | 21         | 68 (63-73)              | 3.5      | 3.5 *            |
|                              | II           | 306        | 71 (64-77)              | 9.2      | 9.4              | 21         | 74 (71-79)              | 3.5      | 4.6              | Regional     | 1,163      | 70 (63-76)              | 34.7     | 34.6             | 169        | 69 (60-76)              | 27.8     | 27.8 *           |
|                              | III          | 617        | 70 (63-76)              | 18.5     | 17.7             | 137        | 66 (60-74)              | 22.7     | 25.7             | Distant      | 1,634      | 68 (60-76)              | 48.7     | 47.8             | 417        | 68 (60-77)              | 68.7     | 68.7 *           |
| Canada, British Columbia     | All patients | 5074       | 70 (62-77)              |          |                  | 774        | 69 (63-76)              |          |                  | All patients | 5,074      | 70 (62-77)              |          |                  | 774        | 69 (63-76)              |          |                  |
| Missing                      | 229          | 75 (66-82) | 4.5                     |          | 20               | 72 (63-78) | 2.6                     |          | Missing          | 147          | 76 (68-83) | 2.9                     |          | 17               | 72 (65-78) | 2.2                     |          |                  |
| I                            | 973          | 70 (64-77) | 20.1                    | 22.6     | 21               | 63 (57-70) | 2.8                     | 2.8 *    | Localised        | 649          | 70 (64-77) | 13.2                    | 14.8     | 11               | 63 (58-75) | 1.5                     | 1.5 *    |                  |
| II                           | 432          | 71 (63-76) | 8.9                     | 8.7      | 26               | 69 (61-72) | 3.4                     | 3.4 *    | Regional         | 1,826        | 71 (63-77) | 37.1                    | 36.9     | 264              | 68 (61-75) | 34.9                    | 34.9 *   |                  |
| III                          | 992          | 70 (63-78) | 20.5                    | 19.9     | 225              | 68 (62-76) | 29.8                    | 29.8 *   | Distant          | 2,452        | 69 (60-77) | 49.8                    | 48.3     | 482              | 70 (64-76) | 63.7                    | 63.7 *   |                  |
| IV                           | 2448         | 69 (60-77) | 50.5                    | 48.8     | 482              | 70 (64-76) | 63.9                    | 63.9 *   |                  |              |            |                         |          |                  |            |                         |          |                  |
| Canada, Manitoba             | All patients | 1231       | 69 (61-76)              |          |                  | 236        | 69 (61-75)              |          |                  | All patients | 1,231      | 69 (61-76)              |          |                  | 236        | 69 (61-75)              |          |                  |
| Missing                      | 3            | 81 (71-81) | 0.2                     |          | 9                | 73 (59-81) | 3.8                     |          | Missing          | 0            | -          | 0.0                     |          | 0                | -          |                         | 0.0      |                  |
| I                            | 213          | 70 (62-76) | 17.3                    | 18.8     | 6                | 75 (68-79) | 2.6                     | 2.6 *    | Localised        | 297          | 70 (63-76) | 24.1                    | 24.1 *   | 10               | 74 (68-77) | 4.2                     | 4.2 *    |                  |
| II                           | 275          | 69 (62-76) | 22.4                    | 20.3     | 12               | 72 (70-76) | 5.3                     | 5.3 *    | Regional         | 348          | 70 (61-77) | 28.3                    | 28.3 *   | 63               | 71 (62-76) | 26.7                    | 26.7 *   |                  |
| III                          | 226          | 69 (60-77) | 18.4                    | 19.2     | 66               | 68 (59-74) | 29.1                    | 29.1 *   | Distant          | 586          | 67 (60-75) | 47.6                    | 47.6 *   | 163              | 68 (61-74) | 69.1                    | 69.1 *   |                  |
| IV                           | 514          | 67 (60-75) | 41.9                    | 41.6     | 143              | 69 (61-74) | 63.0                    | 63.0 *   |                  |              |            |                         |          |                  |            |                         |          |                  |
| Canada, New Brunswick        | All patients | 1034       | 68 (61-76)              |          |                  | 196        | 68 (59-75)              |          |                  | All patients | 1,034      | 68 (61-76)              |          |                  | 196        | 68 (59-75)              |          |                  |
| Missing                      | 10           | 72 (69-79) | 1.0                     |          | 3                | 52 (52-68) | 1.5                     |          | Missing          | 2            | 75 (73-77) | 0.2                     |          | 1                | 52 (52-52) | 0.5                     |          |                  |
| I                            | 321          | 69 (62-76) | 31.3                    | 30.7     | 5                | 72 (70-74) | 2.6                     | 2.6 *    | Localised        | 230          | 69 (63-77) | 22.3                    | 22.1     | 4                | 70 (67-75) | 2.1                     | 2.1 *    |                  |
| II                           | 116          | 68 (63-75) | 11.3                    | 12.2     | 15               | 66 (57-74) | 7.8                     | 7.8 *    | Regional         | 424          | 68 (61-75) | 41.1                    | 40.7     | 70               | 67 (58-75) | 35.9                    | 35.9 *   |                  |
| III                          | 209          | 68 (61-75) | 20.4                    | 19.8     | 52               | 67 (58-75) | 26.9                    | 26.9 *   | Distant          | 378          | 67 (60-76) | 36.6                    | 37.2     | 121              | 67 (60-76) | 62.1                    | 62.1 *   |                  |
| IV                           | 378          | 67 (60-76) | 36.9                    | 37.4     | 121              | 67 (60-76) | 62.7                    | 62.7 *   |                  |              |            |                         |          |                  |            |                         |          |                  |
| Canada, Newfoundland         | All patients | 582        | 67 (60-74)              |          |                  | 126        | 67 (60-72)              |          |                  | All patients | 582        | 67 (60-74)              |          |                  | 126        | 67 (60-72)              |          |                  |
| Missing                      | 9            | 73 (65-81) | 1.5                     |          | 10               | 69 (57-74) | 7.9                     |          | Missing          | 3            | 83 (73-85) | 0.5                     |          | 1                | 68 (68-68) | 0.8                     |          |                  |
| I                            | 117          | 68 (62-75) | 20.4                    | 21.0     | 3                | 84 (71-85) | 2.6                     | 2.6 *    | Localised        | 137          | 69 (62-75) | 23.7                    | 26.3     | 5                | 71 (68-85) | 4.0                     | 4.0 *    |                  |
| II                           | 97           | 69 (62-76) | 16.9                    | 16.9     | 7                | 68 (67-71) | 6.0                     | 6.0 *    | Regional         | 179          | 67 (62-74) | 30.9                    | 27.1     | 38               | 69 (57-73) | 30.4                    | 30.4 *   |                  |
| III                          | 112          | 66 (61-73) | 19.5                    | 18.9     | 28               | 68 (58-74) | 24.1                    | 24.1 *   | Distant          | 263          | 66 (58-73) | 45.4                    | 46.6     | 82               | 66 (60-72) | 65.6                    | 65.6 *   |                  |
| IV                           | 247          | 66 (58-73) | 43.1                    | 43.2     | 78               | 66 (60-72) | 67.2                    | 67.2 *   |                  |              |            |                         |          |                  |            |                         |          |                  |
| Canada, Nova Scotia          | All patients | 1344       | 68 (61-75)              |          |                  | 281        | 68 (60-76)              |          |                  | All patients | 1,344      | 68 (61-75)              |          |                  | 281        | 68 (60-76)              |          |                  |
| Missing                      | 6            | 71 (66-86) | 0.4                     |          | 1                | 73 (73-73) | 0.4                     |          | Missing          | 2            | 76 (66-85) | 0.1                     |          | 1                | 73 (73-73) | 0.4                     |          |                  |
| I                            | 403          | 69 (62-76) | 30.1                    | 30.7     | 4                | 68 (61-77) | 1.4                     | 1.4 *    | Localised        | 352          | 69 (63-76) | 26.2                    | 26.4     | 4                | 68 (61-77) | 1.4                     | 1.4 *    |                  |
| II                           | 103          | 71 (62-76) | 7.7                     | 8.1      | 8                | 65 (60-74) | 2.9                     | 2.9 *    | Regional         | 390          | 69 (62-76) | 29.1                    | 29.4     | 66               | 69 (61-76) | 23.6                    | 23.6 *   |                  |
| III                          | 232          | 69 (61-75) | 17.3                    | 17.0     | 58               | 70 (61-76) | 20.7                    | 20.7 *   | Distant          | 600          | 67 (60-75) | 44.7                    | 44.2     | 210              | 68 (60-77) | 75.0                    | 75.0 *   |                  |
| IV                           | 600          | 67 (60-75) | 44.8                    | 44.2     | 210              | 68 (60-77) | 75.0                    | 75.0 *   |                  |              |            |                         |          |                  |            |                         |          |                  |
| Canada, Ontario              | All patients | 14864      | 69 (62-77)              |          |                  | 2303       | 69 (61-75)              |          |                  | All patients | 14,864     | 69 (62-77)              |          |                  | 2303       | 69 (61-75)              |          |                  |
| Missing                      | 1451         | 70 (61-78) | 9.8                     |          | 140              | 70 (63-77) | 6.1                     |          | Missing          | 1,366        | 70 (61-78) | 9.2                     |          | 134              | 70 (63-77) | 5.8                     |          |                  |
| I                            | 3314         | 70 (63-77) | 24.7                    | 26.0     | 80               | 73 (64-79) | 3.7                     | 3.7 *    | Localised        | 2,626        | 70 (63-77) | 19.5                    | 20.9     | 68               | 73 (63-80) | 3.1                     | 3.4      |                  |
| II                           | 1263         | 69 (62-76) | 9.4                     | 9.6      | 75               | 69 (64-77) | 3.5                     | 3.5 *    | Regional         | 4,652        | 69 (62-76) | 34.5                    | 35.1     | 686              | 68 (60-74) | 31.6                    | 33.6     |                  |
| III                          | 2617         | 69 (61-76) | 19.5                    | 20.0     | 593              | 67 (60-74) | 27.4                    | 27.4 *   | Distant          | 6,220        | 69 (61-77) | 46.1                    | 44.1     | 1415             | 69 (61-75) | 65.2                    | 63.0     |                  |
| IV                           | 6219         | 69 (61-77) | 46.4                    | 44.4     | 1415             | 69 (61-75) | 65.4                    | 65.4 *   |                  |              |            |                         |          |                  |            |                         |          |                  |
| Canada, Prince Edward Island | All patients | 169        | 68 (60-75)              |          |                  | 44         | 69 (63-75)              |          |                  | All patients | 169        | 68 (60-75)              |          |                  | 44         | 69 (63-75)              |          |                  |
| Missing                      | 2            | 77 (77-77) | 1.2                     |          | 1                | 70 (70-70) | 2.3                     |          | Missing          | 1            | 77 (77-77) | 0.6                     |          | 1                | 70 (70-70) | 2.3                     |          |                  |
| I                            | 38           | 72 (64-77) | 22.8                    | 22.6     | 3                | 77 (73-77) | 7.0                     | 7.0 *    | Localised        | 32           | 72 (65-77) | 19.0                    | 19.9     | 2                | 75 (73-77) | 4.7                     | 4.7 *    |                  |
| II                           | 15           | 64 (60-69) | 9.0                     | 8.2      | 3                | 75 (50-81) | 7.0                     | 7.0 *    | Regional         | 51           | 68 (60-73) | 30.4                    | 29.2     | 11               | 67 (62-75) | 25.6                    | 25.6 *   |                  |
| III                          | 29           | 70 (61-74) | 17.4                    | 18.3     | 7                | 67 (62-68) | 16.3                    | 16.3 *   | Distant          | 85           | 67 (59-74) | 50.6                    | 50.9     | 30               | 70 (63-75) | 69.8                    | 69.8 *   |                  |
| IV                           | 85           | 67 (59-74) | 50.9                    | 50.9     | 30               | 70 (63-75) | 69.8                    | 69.8 *   |                  |              |            |                         |          |                  |            |                         |          |                  |
| Canada, Saskatchewan         | All patients | 1165       | 70 (63-77)              |          |                  | 242        | 68 (60-74)              |          |                  | All patients | 1,165      | 70 (63-77)              |          |                  | 242        | 68 (60-74)              |          |                  |
| Missing                      | 9            | 78 (74-81) | 0.8                     |          | 2                | 78 (66-89) | 0.8                     |          | Missing          | 5            | 78 (72-84) | 0.4                     |          | 0                | -          |                         | 0.0      |                  |
| I                            | 261          | 69 (64-77) | 22.6                    | 21.8     | 4                | 69 (62-73) | 1.7                     | 1.7 *    | Localised        | 190          | 69 (64-76) | 16.4                    | 16.7     | 4                | 69 (62-73) | 1.7                     | 1.7 *    |                  |
| II                           | 85           | 72 (66-75) | 7.4                     | 7.8      | 6                | 75 (67-84) | 2.5                     | 2.5 *    | Regional         | 376          | 71 (64-76) | 32.4                    | 33.6     | 71               | 70 (61-78) | 29.3                    | 29.3 *   |                  |
| III                          | 216          | 71 (63-76) | 18.7                    | 20.4     | 63               | 69 (61-77) | 26.3                    | 26.3 *   | Distant          | 594          | 70 (62-78) | 51.2                    | 49.7     | 167              | 67 (60-72) | 69.0                    | 69.0 *   |                  |
| IV                           | 594          | 70 (62-78) | 51.4                    | 50.0     | 167              | 67 (60-72) | 69.6                    | 69.6 *   |                  |              |            |                         |          |                  |            |                         |          |                  |
| UK, England                  | All patients | 44016      | 70 (63-77)              |          |                  | 9113       | 69 (62-75)              |          |                  | All patients | 44,016     | 70 (63-77)              |          |                  | 9113       | 69 (62-75)              |          |                  |
| Missing                      | 16729        | 70 (63-78) | 38.0                    |          | 3554             | 69 (62-76) | 39.0                    |          | Missing          | 12,715       | 71 (63-79) | 28.9                    |          | 3179             | 69 (62-76) | 34.9                    |          |                  |
| I                            | 5124         | 71 (65-77) | 18.8                    | 19.3     | 158              | 70 (63-78) | 2.8                     | 2.9      | Localised        | 7,338        | 70 (64-76) | 23.4                    | 21.4     | 208              | 70 (63-78) | 3.5                     | 3.5      |                  |
| II                           | 2478         | 71 (64-77) | 9.1                     | 9.1      | 185              | 69 (63-75) | 3.3                     | 3.4      | Regional         | 7,557        | 70 (63-77) | 24.1                    | 23.4     | 1030             | 69 (62-75) | 17.4                    | 17.1     |                  |
| III                          | 5819         | 70 (63-77) | 21.3                    | 21.0     | 1480             | 68 (62-75) | 26.6                    | 26.8     | Distant          | 16,406       | 69 (62-77) | 52.4                    | 55.2     | 4696             | 68 (62-75) | 79.1                    | 79.4     |                  |
| IV                           | 13866        | 69 (62-77) | 50.8                    | 50.6     | 3736             | 69 (62-75) | 67.2                    | 66.9     |                  |              |            |                         |          |                  |            |                         |          |                  |
| UK, Northern Ireland         | All patients | 1255       | 69 (61-76)              |          |                  | 332        | 67 (60-74)              |          |                  | All patients | 1,255      | 69 (61-76)              |          |                  | 332        | 67 (60-74)              |          |                  |
| Missing                      | 51           | 74 (67-83) | 4.1                     |          | 60               | 68 (62-75) | 18.1                    |          | Missing          | 41           | 73 (67-83) | 3.3                     |          | 56               | 68 (62-75) | 16.9                    |          |                  |
| I                            | 192          | 70 (63-76) | 15.9                    | 17.6     | 8                | 68 (53-69) | 2.9                     | 2.9 *    | Localised        | 196          | 70 (63-76) | 16.1                    | 17.7     | 9                | 67 (54-69) | 3.3                     | 4.9      |                  |
| II                           | 134          | 69 (62-77) | 11.1                    | 11.8     | 12               | 71 (62-82) | 4.4                     | 4.4 *    | Regional         | 440          | 69 (62-76) | 36.2                    | 37.3     | 94               | 68 (60-75) | 34.1                    | 35.9     |                  |
| III                          | 303          | 69 (62-75) | 25.2                    | 25.2     | 79               | 65 (60-74) | 29.0                    | 29.0 *   | Distant          | 578          | 67 (60-75) | 47.6                    | 45.0     | 173              | 66 (61-72) | 62.7                    | 59.2     |                  |
| IV                           | 575          | 67 (60-75) | 47.8                    | 45.5     | 173              | 66 (61-72) | 63.6                    | 63.6 *   |                  |              |            |                         |          |                  |            |                         |          |                  |
| UK, Scotland                 | All patients | 6226       | 70 (63-76)              |          |                  | 1721       | 68 (62-75)              |          |                  | All patients | 6,226      | 70 (63-76)              |          |                  | 1721       | 68 (62-75)              |          |                  |
| Missing                      | 731          | 73 (66-79) | 11.7                    |          | 274              | 69 (62-76) | 15.9                    |          | Missing          | 512          | 74 (66-80) | 8.2                     |          | 212              | 69 (63-76) | 12.3                    |          |                  |
| I                            | 640          | 70 (63-75) | 11.6                    | 11.9     | 22               | 69 (63-75) | 1.5                     |          |                  |              |            |                         |          |                  |            |                         |          |                  |

**Supplementary Table 17.** Age-standardised<sup>o</sup> one- and three-year net survival (%) by (imputed) stage at diagnosis and jurisdiction for non-small cell lung carcinoma patients diagnosed during 2010-2014, males

| Stage             | Canada, Alberta    | Canada, British Columbia | Canada, Manitoba    | Canada, New Brunswick | Canada, Newfoundland and Labrador | Canada, Nova Scotia | Canada, Ontario    | Canada, Prince Edward Island | Canada, Saskatchewan | UK, England        | UK, Northern Ireland | UK, Scotland       | UK, Wales          |
|-------------------|--------------------|--------------------------|---------------------|-----------------------|-----------------------------------|---------------------|--------------------|------------------------------|----------------------|--------------------|----------------------|--------------------|--------------------|
| All patients      | 46.5 (44.3 - 48.6) | 47.0 (44.9 - 49.0)       | 48.6 (44.7 - 52.4)  | 53.9 (50.0 - 57.7)    | 47.6 (40.8 - 54.2)                | 48.4 (44.9 - 51.8)  | 48.1 (46.8 - 49.3) | 40.5 (31.1 - 49.7)           | 48.5 (44.4 - 52.5)   | 40.8 (40.2 - 41.4) | 39.7 (36.2 - 43.1)   | 42.0 (40.3 - 43.6) | 39.7 (37.0 - 42.4) |
| TNM Stage         |                    |                          |                     |                       |                                   |                     |                    |                              |                      |                    |                      |                    |                    |
| Stage I           | 91.7 (88.9 - 94.4) | 92.6 (90.4 - 94.8)       | 95.9 (90.9 - 100.0) | 93.3 (90.1 - 96.5)    | 82.8 (73.0 - 92.6)                | 91.6 (87.5 - 95.8)  | 91.5 (89.9 - 93.0) | 74.2 (43.9 - 89.8)**         | 88.3 (81.7 - 94.8)   | 88.5 (87.1 - 89.9) | 82.2 (75.4 - 89.1)   | 92.3 (88.4 - 96.3) | 87.3 (83.6 - 91.1) |
| Stage II          | 85.0 (80.0 - 90.1) | 76.9 (70.3 - 83.6)       | 86.4 (80.6 - 92.1)  | 78.6 (68.7 - 88.5)    | 79.6 (68.0 - 91.3)                | 74.0 (65.7 - 82.4)  | 79.8 (76.9 - 82.7) | *                            | 84.0 (76.4 - 91.7)   | 74.9 (72.7 - 77.1) | 72.5 (64.0 - 81.0)   | 83.7 (81.1 - 86.4) | 71.4 (64.4 - 78.4) |
| Stage III         | 56.9 (52.2 - 61.6) | 53.8 (49.2 - 58.4)       | 56.0 (48.1 - 63.9)  | 62.2 (55.4 - 69.0)    | 61.3 (52.2 - 70.4)                | 59.2 (52.2 - 66.3)  | 54.9 (52.2 - 57.6) | 43.9 (25.4 - 60.9)**         | 69.7 (62.2 - 77.2)   | 49.6 (48.2 - 51.0) | 49.6 (42.8 - 56.3)   | 56.6 (53.3 - 60.0) | 50.8 (44.8 - 56.8) |
| Stage IV          | 22.9 (20.5 - 25.2) | 24.9 (22.6 - 27.2)       | 21.2 (17.2 - 25.2)  | 20.4 (16.4 - 24.4)    | 21.5 (15.9 - 27.1)                | 19.6 (15.9 - 23.3)  | 23.7 (22.2 - 25.1) | 13.4 (6.3 - 23.1)**          | 24.0 (19.8 - 28.2)   | 19.4 (18.7 - 20.1) | 17.0 (13.4 - 20.5)   | 15.9 (14.2 - 17.5) | 17.7 (14.8 - 20.6) |
| Mapped SEER stage |                    |                          |                     |                       |                                   |                     |                    |                              |                      |                    |                      |                    |                    |
| Localised         | 90.7 (87.3 - 94.2) | 91.9 (88.8 - 94.9)       | 95.6 (92.0 - 99.2)  | 91.8 (87.9 - 95.7)    | 82.1 (72.4 - 91.8)                | 92.4 (88.1 - 96.7)  | 90.9 (89.1 - 92.6) | 73.4 (51.5 - 95.3)           | 87.9 (80.2 - 95.6)   | 86.8 (85.6 - 88.0) | 81.5 (74.5 - 88.4)   | 88.7 (86.4 - 91.1) | 87.4 (83.5 - 91.2) |
| Regional          | 70.7 (67.4 - 73.9) | 65.8 (62.6 - 69.1)       | 70.5 (64.5 - 76.6)  | 71.1 (66.1 - 76.1)    | 66.6 (58.7 - 74.5)                | 67.3 (62.5 - 72.1)  | 65.8 (63.6 - 68.0) | 58.1 (44.6 - 71.6)           | 75.0 (69.4 - 80.6)   | 59.9 (58.6 - 61.3) | 55.6 (49.5 - 61.7)   | 64.4 (61.8 - 67.1) | 56.6 (52.0 - 61.2) |
| Distant           | 22.9 (20.5 - 25.3) | 24.8 (22.5 - 27.1)       | 22.9 (18.9 - 26.9)  | 20.4 (16.4 - 24.4)    | 23.4 (17.8 - 29.1)                | 19.8 (16.0 - 23.5)  | 23.6 (22.1 - 25.1) | 13.4 (4.9 - 21.8)            | 23.8 (19.6 - 27.9)   | 20.7 (20.1 - 21.4) | 17.0 (13.5 - 20.5)   | 18.1 (16.5 - 19.8) | 17.7 (14.8 - 20.5) |
| All patients      | 26.5 (24.6 - 28.5) | 25.9 (24.1 - 27.8)       | 30.1 (26.5 - 33.9)  | 33.4 (30.0 - 36.8)    | 22.6 (17.3 - 28.4)                | 28.6 (25.6 - 31.7)  | 27.0 (25.9 - 28.1) | 16.3 (10.1 - 23.8)           | 26.1 (22.1 - 30.2)   | 19.7 (19.3 - 20.2) | 18.9 (16.5 - 21.5)   | 20.1 (18.8 - 21.4) | 17.7 (15.6 - 19.9) |
| TNM Stage         |                    |                          |                     |                       |                                   |                     |                    |                              |                      |                    |                      |                    |                    |
| Stage I           | 74.9 (70.1 - 79.8) | 72.6 (68.5 - 76.6)       | 78.9 (69.6 - 88.1)  | 74.9 (68.6 - 81.1)    | 64.4 (49.8 - 79.0)                | 67.5 (60.7 - 74.2)  | 76.2 (73.7 - 78.8) | 57.1 (29.9 - 77.1)**         | 74.4 (65.3 - 83.5)   | 68.6 (66.5 - 70.7) | 61.2 (52.7 - 69.6)   | 73.2 (67.3 - 79.0) | 64.5 (58.4 - 70.7) |
| Stage II          | 55.2 (47.8 - 62.6) | 52.4 (44.5 - 60.4)       | 68.5 (60.6 - 76.4)  | 48.5 (36.4 - 60.7)    | 50.1 (34.4 - 65.8)                | 46.6 (37.2 - 55.9)  | 54.7 (50.4 - 59.0) | *                            | 61.2 (45.9 - 76.6)   | 48.2 (45.3 - 51.1) | 41.1 (31.5 - 50.7)   | 53.6 (49.6 - 57.7) | 40.2 (31.4 - 49.0) |
| Stage III         | 26.0 (21.8 - 30.3) | 25.1 (21.5 - 28.8)       | 27.1 (20.0 - 34.3)  | 30.3 (23.7 - 36.9)    | 23.6 (15.5 - 31.6)                | 30.6 (22.5 - 38.6)  | 23.7 (20.8 - 26.6) | 11.5 (3.9 - 23.5)**          | 31.3 (23.8 - 38.9)   | 17.8 (16.8 - 18.9) | 18.6 (14.1 - 23.2)   | 22.6 (19.7 - 25.6) | 18.3 (13.4 - 23.1) |
| Stage IV          | 7.3 (5.8 - 8.9)    | 8.1 (6.4 - 9.9)          | 4.3 (2.2 - 6.5)     | 4.6 (2.3 - 7.0)       | 3.1 (0.5 - 5.7)                   | 7.7 (5.3 - 10.1)    | 6.5 (5.6 - 7.4)    | 4.0 (1.2 - 9.5)**            | 5.0 (2.6 - 7.3)      | 4.3 (3.9 - 4.7)    | 3.1 (1.6 - 4.7)      | 2.4 (1.7 - 3.0)    | 3.8 (2.2 - 5.5)    |
| Mapped SEER stage |                    |                          |                     |                       |                                   |                     |                    |                              |                      |                    |                      |                    |                    |
| Localised         | 67.9 (61.1 - 74.7) | 71.8 (66.9 - 76.8)       | 79.9 (72.2 - 87.6)  | 72.6 (65.0 - 80.1)    | 65.0 (51.7 - 78.3)                | 68.4 (61.0 - 75.7)  | 75.7 (72.6 - 78.8) | 60.7 (35.9 - 85.4)           | 74.2 (63.6 - 84.8)   | 65.6 (63.8 - 67.5) | 60.7 (52.3 - 69.1)   | 65.3 (61.5 - 69.1) | 63.8 (57.7 - 69.8) |
| Regional          | 43.7 (40.0 - 47.4) | 39.1 (35.9 - 42.4)       | 44.8 (37.6 - 52.0)  | 42.3 (36.9 - 47.8)    | 30.2 (22.4 - 38.0)                | 38.0 (29.4 - 46.6)  | 37.4 (35.1 - 39.8) | 15.7 (6.4 - 25.0)            | 42.1 (35.6 - 48.6)   | 27.5 (26.2 - 28.8) | 26.6 (22.1 - 31.1)   | 31.8 (29.2 - 34.4) | 23.8 (19.7 - 27.9) |
| Distant           | 7.4 (5.8 - 9.0)    | 8.1 (6.4 - 9.9)          | 7.0 (4.6 - 9.4)     | 4.8 (2.3 - 7.2)       | 3.9 (1.0 - 6.7)                   | 7.7 (5.3 - 10.1)    | 6.5 (5.5 - 7.5)    | 4.0 (0.0 - 8.0)              | 5.1 (2.7 - 7.4)      | 4.2 (3.8 - 4.6)    | 3.2 (1.7 - 4.8)      | 3.1 (2.3 - 3.8)    | 4.0 (2.3 - 5.6)    |

<sup>o</sup>NS = Net Survival; CI = Confidence Interval

\* <30 patients

\*\* Non-imputed results - imputation model did not converge

<sup>o</sup> Standard population used for age-standardisation is International Cancer Survival Standard (ICSS-1) derived in Corazzari et al. (2004)

**Supplementary Table 18.** Age-standardised<sup>o</sup> one- and three-year net survival (%) by (imputed) stage at diagnosis and jurisdiction for non-small cell lung carcinoma patients diagnosed during 2010-2014, females

| Stage                    | Canada, Alberta    | Canada, British Columbia | Canada, Manitoba     | Canada, New Brunswick | Canada, Newfoundland and Labrador | Canada, Nova Scotia | Canada, Ontario    | Canada, Prince Edward Island | Canada, Saskatchewan | UK, England        | UK, Northern Ireland | UK, Scotland       | UK, Wales          |
|--------------------------|--------------------|--------------------------|----------------------|-----------------------|-----------------------------------|---------------------|--------------------|------------------------------|----------------------|--------------------|----------------------|--------------------|--------------------|
| All patients             | 58.7 (56.7 - 60.7) | 56.8 (54.9 - 58.6)       | 59.9 (56.2 - 63.4)   | 64.3 (60.9 - 67.5)    | 62.8 (57.0 - 68.1)                | 58.3 (54.8 - 61.6)  | 59.1 (58.0 - 60.2) | 55.4 (46.0 - 63.9)           | 58.2 (54.6 - 61.6)   | 50.4 (49.8 - 51.0) | 47.8 (44.3 - 51.1)   | 50.3 (48.6 - 52.0) | 47.2 (44.7 - 49.6) |
| <b>TNM Stage</b>         |                    |                          |                      |                       |                                   |                     |                    |                              |                      |                    |                      |                    |                    |
| Stage I                  | 96.2 (94.4 - 98.0) | 94.7 (93.0 - 96.5)       | 98.7 (96.2 - 100.0)  | 93.0 (89.3 - 96.7)    | 96.0 (91.0 - 100.0)               | 95.1 (92.1 - 98.1)  | 93.9 (92.6 - 95.2) | 98.4 (92.7 - 100.0)          | 92.0 (87.4 - 96.5)   | 92.5 (91.6 - 93.5) | 86.7 (80.7 - 92.6)   | 96.3 (94.2 - 98.4) | 89.3 (85.3 - 93.4) |
| Stage II                 | 79.4 (73.7 - 85.1) | 84.3 (80.2 - 88.4)       | 89.1 (84.1 - 94.1)   | 92.7 (87.2 - 98.3)    | 83.8 (73.5 - 94.2)                | 86.7 (78.0 - 95.4)  | 82.8 (78.9 - 86.7) | *                            | 79.6 (68.9 - 90.3)   | 79.0 (76.8 - 81.2) | 82.6 (75.2 - 90.1)   | 86.7 (84.1 - 89.3) | 77.6 (70.9 - 84.3) |
| Stage III                | 66.8 (62.3 - 71.3) | 62.1 (56.7 - 67.6)       | 66.5 (59.1 - 73.9)   | 61.1 (53.0 - 69.1)    | 62.9 (50.0 - 75.8)                | 63.8 (56.0 - 71.5)  | 63.2 (60.4 - 66.0) | 70.0 (49.1 - 90.8)           | 64.7 (57.1 - 72.2)   | 55.0 (53.4 - 56.6) | 46.7 (39.9 - 53.6)   | 59.8 (55.9 - 63.6) | 50.2 (43.9 - 56.6) |
| Stage IV                 | 31.4 (28.6 - 34.1) | 33.3 (30.9 - 35.8)       | 22.8 (18.1 - 27.5)   | 23.5 (18.5 - 28.5)    | 32.0 (24.1 - 40.0)                | 22.1 (18.0 - 26.1)  | 31.4 (29.7 - 33.0) | 23.8 (12.6 - 35.0)           | 33.0 (28.4 - 37.7)   | 25.6 (24.7 - 26.4) | 18.9 (15.2 - 22.7)   | 21.1 (19.0 - 23.2) | 21.8 (18.5 - 25.0) |
| <b>Mapped SEER stage</b> |                    |                          |                      |                       |                                   |                     |                    |                              |                      |                    |                      |                    |                    |
| Localised                | 96.7 (94.6 - 98.8) | 95.1 (93.1 - 97.2)       | 97.1 (92.8 - 98.8)** | 95.3 (91.7 - 98.9)    | 94.8 (89.9 - 99.8)                | 94.8 (91.5 - 98.1)  | 93.4 (91.8 - 95.0) | 97.9 (91.0 - 100.0)          | 91.9 (86.2 - 97.5)   | 91.6 (90.8 - 92.4) | 86.9 (81.0 - 92.9)   | 94.0 (92.4 - 95.7) | 89.4 (85.5 - 93.4) |
| Regional                 | 76.2 (73.3 - 79.1) | 73.8 (70.9 - 76.7)       | 77.7 (71.7 - 82.5)** | 77.9 (73.3 - 82.5)    | 67.0 (53.1 - 80.8)                | 74.8 (69.5 - 80.2)  | 72.8 (70.8 - 74.8) | 75.4 (60.1 - 90.7)           | 73.2 (67.8 - 78.5)   | 63.6 (62.2 - 64.9) | 57.7 (52.2 - 63.2)   | 66.0 (62.7 - 69.3) | 58.4 (53.6 - 63.2) |
| Distant                  | 31.3 (28.5 - 34.1) | 33.3 (30.9 - 35.8)       | 26.3 (21.7 - 31.1)** | 31.6 (26.4 - 36.9)    | 40.8 (32.9 - 48.6)                | 22.1 (18.0 - 26.2)  | 31.3 (29.7 - 32.9) | 24.5 (13.2 - 35.8)           | 35.2 (30.4 - 39.9)   | 26.7 (26.0 - 27.5) | 19.0 (15.2 - 22.8)   | 22.4 (20.3 - 24.5) | 21.7 (18.5 - 24.9) |
| All patients             | 36.2 (34.1 - 38.3) | 34.1 (32.3 - 36.0)       | 41.5 (38.0 - 45.0)   | 43.5 (38.7 - 48.1)    | 39.7 (33.2 - 46.0)                | 37.8 (34.4 - 41.2)  | 36.9 (35.7 - 38.1) | 31.8 (23.3 - 40.6)           | 36.6 (33.1 - 40.1)   | 28.3 (27.8 - 28.9) | 27.1 (24.0 - 30.3)   | 27.9 (26.4 - 29.5) | 26.8 (24.6 - 29.0) |
| <b>TNM Stage</b>         |                    |                          |                      |                       |                                   |                     |                    |                              |                      |                    |                      |                    |                    |
| Stage I                  | 73.9 (62.4 - 85.4) | 83.3 (78.8 - 87.7)       | 87.0 (80.8 - 93.3)   | 78.2 (72.2 - 84.1)    | 84.3 (73.5 - 95.1)                | 77.6 (72.2 - 82.9)  | 82.5 (80.4 - 84.6) | 76.0 (55.7 - 96.3)           | 82.4 (76.3 - 88.5)   | 76.3 (74.6 - 78.1) | 67.6 (59.0 - 76.2)   | 81.4 (77.0 - 85.8) | 73.5 (67.6 - 79.4) |
| Stage II                 | 58.1 (50.3 - 65.9) | 62.1 (56.5 - 67.7)       | 70.1 (63.1 - 77.0)   | 60.4 (49.5 - 71.2)    | 66.0 (52.5 - 79.5)                | 69.9 (58.2 - 81.5)  | 59.4 (54.8 - 64.0) | *                            | 52.7 (38.6 - 66.8)   | 52.4 (49.6 - 55.3) | 51.6 (40.6 - 62.7)   | 60.1 (55.7 - 64.5) | 49.9 (39.8 - 60.1) |
| Stage III                | 31.5 (27.0 - 36.0) | 29.6 (23.1 - 36.1)       | 32.3 (25.0 - 39.7)   | 32.5 (24.6 - 40.4)    | 28.7 (15.8 - 41.6)                | 29.4 (22.3 - 36.4)  | 30.4 (27.5 - 33.4) | 28.7 (4.6 - 52.8)            | 30.9 (23.2 - 38.6)   | 22.5 (20.7 - 24.3) | 18.7 (13.0 - 24.4)   | 23.7 (19.9 - 27.5) | 21.1 (16.0 - 26.2) |
| Stage IV                 | 10.4 (8.4 - 12.4)  | 11.0 (9.3 - 12.8)        | 7.1 (4.3 - 9.9)      | 9.2 (5.8 - 12.7)      | 7.7 (2.1 - 13.3)                  | 4.9 (2.7 - 7.1)     | 8.6 (7.5 - 9.7)    | 6.3 (0.0 - 12.7)             | 10.3 (7.3 - 13.3)    | 6.0 (5.4 - 6.6)    | 3.6 (1.9 - 5.4)      | 4.3 (3.3 - 5.3)    | 6.0 (4.0 - 8.0)    |
| <b>Mapped SEER stage</b> |                    |                          |                      |                       |                                   |                     |                    |                              |                      |                    |                      |                    |                    |
| Localised                | 82.7 (78.5 - 86.9) | 85.6 (82.2 - 89.0)       | 86.9 (81.0 - 91.2)** | 80.0 (73.2 - 86.7)    | 85.4 (76.2 - 94.7)                | 77.3 (71.6 - 83.0)  | 81.8 (79.4 - 84.2) | 78.8 (55.3 - 100.0)          | 82.8 (75.5 - 90.1)   | 73.9 (72.4 - 75.5) | 67.4 (58.7 - 76.1)   | 74.3 (70.8 - 77.7) | 73.3 (67.5 - 79.1) |
| Regional                 | 45.4 (41.2 - 49.6) | 46.6 (42.7 - 50.5)       | 52.0 (45.7 - 58.0)** | 50.7 (43.6 - 57.9)    | 42.4 (30.7 - 54.1)                | 47.4 (41.3 - 53.4)  | 45.6 (43.2 - 47.9) | 36.5 (19.6 - 53.5)           | 48.5 (42.5 - 54.5)   | 30.8 (29.4 - 32.2) | 28.7 (23.2 - 34.3)   | 31.7 (28.0 - 35.3) | 28.8 (24.0 - 33.7) |
| Distant                  | 10.4 (8.4 - 12.4)  | 10.9 (9.1 - 12.7)        | 8.6 (6.0 - 11.7)**   | 13.6 (6.2 - 21.0)     | 7.4 (0.0 - 18.1)                  | 4.9 (2.7 - 7.0)     | 8.5 (7.5 - 9.6)    | 6.4 (0.0 - 12.8)             | 11.5 (8.2 - 14.8)    | 5.6 (5.1 - 6.0)    | 3.5 (1.8 - 5.2)      | 4.8 (3.9 - 5.8)    | 6.1 (4.1 - 8.2)    |

<sup>†</sup>NS = Net Survival; CI = Confidence Interval

\* <30 patients

\*\* Non-imputed results - imputation model did not converge

<sup>o</sup> Standard population used for age-standardisation is International Cancer Survival Standard (ICSS-1) derived in Corazziari et al. (2004)



**Supplementary Table 19.** Age-standardised\* one- and three-year net survival (%) by (imputed) stage at diagnosis and jurisdiction for small cell lung carcinoma patients diagnosed during 2010-2014, males

| Stage                    | Canada, Alberta      | Canada, British Columbia | Canada, Manitoba     | Canada, New Brunswick | Canada, Newfoundland and Labrador | Canada, Nova Scotia  | Canada, Ontario    | Canada, Prince Edward Island | Canada, Saskatchewan | UK, England        | UK, Northern Ireland | UK, Scotland       | UK, Wales            |
|--------------------------|----------------------|--------------------------|----------------------|-----------------------|-----------------------------------|----------------------|--------------------|------------------------------|----------------------|--------------------|----------------------|--------------------|----------------------|
| All patients             | 31.3 (26.6 - 36.1)   | 25.5 (16.9 - 35.0)       | 27.2 (20.2 - 34.7)   | 27.7 (20.6 - 35.4)    | 29.4 (20.8 - 38.5)                | 22.5 (15.7 - 30.0)   | 27.9 (24.7 - 31.1) | 27.2 (11.8 - 45.4)           | 26.4 (19.1 - 34.3)   | 25.6 (24.3 - 26.9) | 18.7 (13.2 - 25.0)   | 25.0 (22.1 - 28.0) | 20.3 (16.1 - 24.9)   |
| <b>TNM Stage</b>         |                      |                          |                      |                       |                                   |                      |                    |                              |                      |                    |                      |                    |                      |
| Stage I                  | *                    | *                        | *                    | *                     | *                                 | *                    | 84.8 (73.9 - 95.7) | *                            | *                    | 74.6 (67.1 - 82.2) | *                    | *                  | *                    |
| Stage II                 | *                    | *                        | *                    | *                     | *                                 | *                    | 72.0 (57.2 - 86.8) | *                            | *                    | 67.7 (60.3 - 75.1) | *                    | 60.7 (43.7 - 77.7) | *                    |
| Stage III                | 57.2 (46.8 - 67.7)   | 41.1 (31.9 - 50.0)**     | 43.1 (21.9 - 62.7)** | 54.7 (37.0 - 69.4)**  | 61.7 (35.8 - 79.7)**              | 23.8 (8.5 - 43.2)**  | 52.2 (46.3 - 58.1) | *                            | 44.9 (26.7 - 61.5)** | 44.2 (41.5 - 47.0) | 33.9 (21.8 - 46.5)** | 44.9 (37.8 - 52.1) | 39.2 (27.1 - 51.0)** |
| Stage IV                 | 15.8 (11.6 - 20.0)   | 19.6 (15.4 - 24.1)**     | 12.9 (7.3 - 20.2)**  | 15.5 (9.4 - 23.0)**   | 13.8 (7.1 - 22.8)**               | 15.8 (10.2 - 22.6)** | 17.3 (14.9 - 19.7) | 21.6 (8.2 - 39.1)** °        | 17.9 (11.7 - 25.3)** | 15.8 (14.7 - 16.9) | 10.2 (5.9 - 15.9)**  | 14.1 (11.4 - 16.8) | 10.0 (6.7 - 14.0)**  |
| <b>Mapped SEER stage</b> |                      |                          |                      |                       |                                   |                      |                    |                              |                      |                    |                      |                    |                      |
| Localised                | *                    | *                        | *                    | *                     | *                                 | *                    | 89.8 (80.2 - 99.4) | *                            | *                    | 70.6 (63.4 - 77.9) | *                    | 56.7 (38.1 - 75.3) | *                    |
| Regional                 | 62.0 (52.0 - 70.5)** | 45.4 (36.8 - 53.6)**     | 54.8 (35.2 - 70.7)** | 56.4 (39.4 - 70.3)**  | 57.0 (32.3 - 75.6)**              | 32.2 (15.3 - 50.3)** | 54.9 (49.4 - 60.3) | *                            | 46.6 (29.5 - 62.1)** | 51.0 (47.6 - 54.5) | 37.2 (25.3 - 49.1)** | 44.3 (36.5 - 52.2) | 39.0 (27.1 - 50.6)** |
| Distant                  | 17.6 (13.1 - 22.6)** | 17.7 (12.2 - 24.1)**     | 15.8 (9.6 - 23.2)**  | 15.5 (9.4 - 23.0)**   | 16.8 (9.3 - 26.1)**               | 15.8 (10.2 - 22.6)** | 17.1 (14.8 - 19.5) | 23.9 (8.5 - 43.7)**          | 17.9 (11.7 - 25.3)** | 18.6 (17.5 - 19.8) | 10.9 (6.5 - 16.7)**  | 17.1 (14.3 - 19.9) | 10.0 (6.7 - 14.0)**  |
| All patients             | 8.9 (6.0 - 12.4)     | 12.0 (7.8 - 17.3)        | 6.8 (3.4 - 11.7)     | 12.4 (7.8 - 18.2)     | 13.4 (7.3 - 21.2)                 | 4.1 (1.6 - 8.4)      | 9.6 (7.4 - 12.1)   | 6.0 (0.6 - 21.7)             | 4.3 (1.5 - 9.4)      | 6.4 (5.7 - 7.2)    | 4.7 (2.5 - 8.0)      | 5.7 (4.2 - 7.6)    | 5.9 (3.9 - 8.5)      |
| <b>TNM Stage</b>         |                      |                          |                      |                       |                                   |                      |                    |                              |                      |                    |                      |                    |                      |
| Stage I                  | *                    | *                        | *                    | *                     | *                                 | *                    | 62.1 (43.7 - 80.4) | *                            | *                    | 36.6 (26.5 - 46.7) | *                    | *                  | *                    |
| Stage II                 | *                    | *                        | *                    | *                     | *                                 | *                    | 35.2 (17.0 - 53.4) | *                            | *                    | 31.8 (24.3 - 39.4) | *                    | 27.8 (12.9 - 42.8) | *                    |
| Stage III                | 16.4 (7.7 - 25.1)    | 8.7 (4.0 - 15.7)**       | 10.8 (2.5 - 26.3)**  | 25.2 (12.4 - 40.4)**  | 20.0 (5.4 - 41.2)**               | 3.0 (0.4 - 11.1)**   | 19.1 (14.1 - 24.0) | *                            | 20.6 (7.6 - 37.9)**  | 12.0 (10.2 - 13.9) | 8.7 (3.2 - 17.8)**   | 12.0 (7.0 - 17.0)  | 11.0 (5.9 - 17.8)**  |
| Stage IV                 | 4.0 (1.8 - 6.1)      | 5.7 (3.3 - 9.0)**        | 0.9 (0.1 - 3.8)**    | 3.6 (1.2 - 8.5)**     | 9.9 (4.4 - 18.1)**                | 3.2 (1.2 - 6.7)**    | 3.4 (2.2 - 4.5)    | 5.0 (0.4 - 19.4)** °         | 0.5 (0.0 - 3.4)**    | 2.1 (1.7 - 2.6)    | 0.4 (0.0 - 3.2)**    | 1.4 (0.5 - 2.3)    | 1.7 (0.6 - 4.0)**    |
| <b>Mapped SEER stage</b> |                      |                          |                      |                       |                                   |                      |                    |                              |                      |                    |                      |                    |                      |
| Localised                | *                    | *                        | *                    | *                     | *                                 | *                    | 59.8 (38.2 - 81.4) | *                            | *                    | 35.9 (27.9 - 44.0) | *                    | 27.7 (12.4 - 43.0) | *                    |
| Regional                 | 21.1 (12.4 - 31.3)** | 14.4 (8.7 - 21.4)**      | 17.5 (5.6 - 34.7)**  | 24.6 (13.3 - 37.6)**  | 21.9 (5.7 - 44.7)**               | 4.1 (0.7 - 12.7)**   | 22.4 (17.5 - 27.3) | *                            | 23.1 (10.1 - 39.1)** | 17.2 (13.9 - 20.5) | 13.4 (6.6 - 22.6)**  | 14.8 (8.7 - 20.9)  | 12.6 (7.3 - 19.6)**  |
| Distant                  | 3.7 (1.7 - 7.0)**    | 5.1 (2.8 - 8.4)**        | 2.1 (0.5 - 5.7)**    | 3.6 (1.2 - 8.5)**     | 8.1 (3.2 - 16.0)**                | 3.2 (1.2 - 6.7)**    | 3.3 (2.1 - 4.4)    | 7.8 (0.8 - 26.0)**           | 0.5 (0.0 - 3.4)**    | 2.8 (2.3 - 3.3)    | 0.4 (0.0 - 3.2)**    | 2.3 (1.2 - 3.3)    | 1.7 (0.6 - 4.0)**    |

\*NS = Net Survival; CI = Confidence Interval

\* &lt;30 patients

\*\* Non-imputed results - imputation model did not converge

° No age standardisation

\* Standard population used for age-standardisation is International Cancer Survival Standard (ICSS-1) derived in Corazzari et al. (2004)

**Supplementary Table 20.** Age-standardised<sup>†</sup> one- and three-year net survival (%) by (imputed) stage at diagnosis and jurisdiction for small cell lung carcinoma patients diagnosed during 2010-2014, females

| Stage                    | Canada, Alberta      | Canada, British Columbia | Canada, Manitoba     | Canada, New Brunswick | Canada, Newfoundland and Labrador | Canada, Nova Scotia  | Canada, Ontario      | Canada, Prince Edward Island | Canada, Saskatchewan | UK, England        | UK, Northern Ireland | UK, Scotland       | UK, Wales            |
|--------------------------|----------------------|--------------------------|----------------------|-----------------------|-----------------------------------|----------------------|----------------------|------------------------------|----------------------|--------------------|----------------------|--------------------|----------------------|
| All patients             | 39.0 (34.4 - 43.6)   | 35.0 (29.8 - 40.3)       | 35.6 (28.5 - 42.8)   | 40.9 (31.9 - 49.6)    | 36.7 (25.8 - 47.7)                | 28.3 (21.4 - 35.7)   | 41.0 (37.6 - 44.3)   | 33.3 (11.3 - 57.5)           | 40.7 (32.6 - 48.6)   | 31.5 (30.1 - 33.0) | 27.2 (21.4 - 33.3)   | 29.6 (26.0 - 33.3) | 33.3 (29.0 - 37.6)   |
| <b>TNM Stage</b>         |                      |                          |                      |                       |                                   |                      |                      |                              |                      |                    |                      |                    |                      |
| Stage I                  | *                    | *                        | *                    | *                     | *                                 | *                    | 81.0 (65.5 - 90.0)** | *                            | *                    | 80.4 (73.8 - 87.1) | *                    | *                  | *                    |
| Stage II                 | *                    | *                        | *                    | *                     | *                                 | *                    | 75.4 (58.7 - 86.2)** | *                            | *                    | 69.9 (63.0 - 76.8) | *                    | 76.5 (60.7 - 92.3) | *                    |
| Stage III                | 56.8 (46.4 - 67.3)   | 57.6 (49.3 - 65.1)**     | 53.2 (38.6 - 65.8)** | 57.0 (35.0 - 74.0)**  | *                                 | 50.4 (34.3 - 64.5)** | 56.6 (51.3 - 61.6)** | *                            | 63.9 (46.5 - 76.9)** | 51.0 (48.5 - 53.5) | 42.2 (28.8 - 55.0)** | 52.8 (47.1 - 58.5) | 46.8 (37.7 - 55.3)** |
| Stage IV                 | 20.8 (16.0 - 25.6)   | 16.7 (8.5 - 27.2)**      | 19.1 (12.1 - 27.4)** | 28.3 (19.1 - 38.2)**  | 26.2 (15.3 - 38.5)**              | 17.0 (11.5 - 23.4)** | 27.3 (24.1 - 30.5)** | 32.0 (11.1 - 55.4)** °       | 25.5 (17.4 - 34.3)** | 19.3 (18.0 - 20.5) | 17.8 (11.5 - 25.4)** | 18.2 (15.4 - 21.0) | 16.5 (12.4 - 21.2)** |
| <b>Mapped SEER stage</b> |                      |                          |                      |                       |                                   |                      |                      |                              |                      |                    |                      |                    |                      |
| Localised                | *                    | *                        | *                    | *                     | *                                 | *                    | 76.7 (63.2 - 90.3)   | *                            | *                    | 75.6 (69.0 - 82.2) | *                    | 78.2 (65.4 - 91.1) | *                    |
| Regional                 | 63.1 (54.1 - 70.8)** | 61.6 (54.1 - 68.3)**     | 58.7 (44.2 - 70.6)** | 62.0 (42.9 - 76.3)**  | 51.1 (19.3 - 76.0)**              | 55.3 (40.0 - 68.1)** | 58.8 (54.2 - 63.5)   | *                            | 66.3 (49.4 - 78.7)** | 59.0 (55.8 - 62.2) | 40.2 (29.0 - 51.5)   | 58.4 (51.8 - 65.0) | 47.3 (38.5 - 55.5)** |
| Distant                  | 19.8 (15.4 - 24.7)** | 16.7 (8.5 - 27.2)**      | 23.0 (15.6 - 31.2)** | 28.3 (19.1 - 38.2)**  | 25.9 (15.3 - 37.8)**              | 17.0 (11.5 - 23.4)** | 27.1 (24.0 - 30.2)   | 23.9 (4.9 - 50.8)**          | 25.5 (17.4 - 34.3)** | 23.2 (22.0 - 24.5) | 14.9 (9.1 - 20.8)    | 21.6 (18.9 - 24.4) | 16.5 (12.4 - 21.2)** |
| All patients             | 13.6 (8.9 - 19.2)    | 11.2 (7.5 - 15.6)        | 14.8 (10.0 - 20.6)   | 14.0 (8.8 - 20.3)     | 9.1 (3.4 - 18.1)                  | 11.5 (7.0 - 17.1)    | 14.8 (12.3 - 17.5)   | 13.5 (2.6 - 33.5)            | 15.2 (9.9 - 21.6)    | 9.2 (8.4 - 10.2)   | 7.3 (4.1 - 11.6)     | 9.4 (7.6 - 11.3)   | 8.3 (3.4 - 15.7)     |
| <b>TNM Stage</b>         |                      |                          |                      |                       |                                   |                      |                      |                              |                      |                    |                      |                    |                      |
| Stage I                  | *                    | *                        | *                    | *                     | *                                 | *                    | 55.8 (36.4 - 71.5)** | *                            | *                    | 51.6 (40.4 - 62.8) | *                    | *                  | *                    |
| Stage II                 | *                    | *                        | *                    | *                     | *                                 | *                    | 35.7 (17.9 - 54.1)** | *                            | *                    | 37.5 (28.0 - 46.9) | *                    | 33.1 (16.9 - 49.4) | *                    |
| Stage III                | 22.3 (13.7 - 30.8)   | 22.1 (14.2 - 31.1)**     | 17.3 (8.5 - 28.7)**  | 20.9 (8.6 - 36.8)**   | *                                 | 24.8 (13.5 - 38.0)** | 23.6 (19.0 - 28.5)** | *                            | 24.5 (12.5 - 38.6)** | 15.6 (13.7 - 17.6) | 14.0 (6.4 - 24.4)**  | 16.8 (12.1 - 21.5) | 13.1 (8.2 - 19.1)**  |
| Stage IV                 | 3.0 (1.1 - 5.0)      | 2.8 (1.1 - 5.8)**        | 8.4 (4.1 - 14.4)**   | 5.7 (2.1 - 11.7)**    | 4.2 (0.7 - 12.8)**                | 3.5 (1.2 - 7.7)**    | 5.1 (3.6 - 6.9)**    | **                           | 8.1 (3.8 - 14.5)**   | 3.1 (2.4 - 3.8)    | 2.6 (0.5 - 8.2)**    | 3.1 (1.7 - 4.4)    | 4.5 (2.5 - 7.4)**    |
| <b>Mapped SEER stage</b> |                      |                          |                      |                       |                                   |                      |                      |                              |                      |                    |                      |                    |                      |
| Localised                | *                    | *                        | *                    | *                     | *                                 | *                    | 53.0 (35.0 - 71.0)   | *                            | *                    | 48.5 (41.0 - 55.9) | *                    | 11.5 (0.0 - 31.4)  | *                    |
| Regional                 | 30.2 (21.9 - 38.9)** | 24.6 (17.0 - 33.0)**     | 26.1 (14.3 - 39.6)** | 24.6 (12.9 - 38.4)**  | 17.0 (2.2 - 44.0)**               | 30.2 (18.2 - 43.1)** | 26.7 (22.3 - 31.1)   | *                            | 25.8 (14.1 - 39.2)** | 20.0 (17.3 - 22.7) | 13.1 (6.0 - 20.3)    | 13.1 (6.0 - 20.3)  | 15.1 (10.0 - 21.2)** |
| Distant                  | 2.8 (1.4 - 5.0)**    | 2.8 (1.1 - 5.8)**        | 8.7 (4.7 - 14.3)**   | 5.7 (2.1 - 11.7)**    | 3.8 (0.7 - 11.8)**                | 3.5 (1.2 - 7.7)**    | 5.2 (3.6 - 6.7)      | **                           | 8.1 (3.8 - 14.5)**   | 4.7 (4.0 - 5.4)    | 2.8 (0.0 - 5.8)      | 2.8 (0.0 - 5.8)    | 4.5 (2.5 - 7.4)**    |

<sup>†</sup>NS = Net Survival; CI = Confidence Interval

\* <30 patients

\*\* Non-imputed results - imputation model did not converge

° No age standardisation

<sup>†</sup> Standard population used for age-standardisation is International Cancer Survival Standard (ICSS-1) derived in Corazziari et al. (2004)
